# Supplementary material
Source: PubMed Central journal article supplement (PMC5942247)

**Supplementary Figure 2: Plots of each genetic locus.** The name of each SNP is given in the title, along with the population it was found/plotted in: G, GERA analysis, GG GERA+GLGC analysis. The circles in the plot indicate genotyped SNPs, and the triangles imputed SNPs. The light blue line is the recombination map, and corresponds to the y-axis on the right hand side of the plot. The color scheme of each point identifies the correlation to the lead SNP at the locus (colorbar on the left). The lead SNP is slightly larger, colored in magenta, and has a vertical dotted line going through it.

rs144432213 – TG G

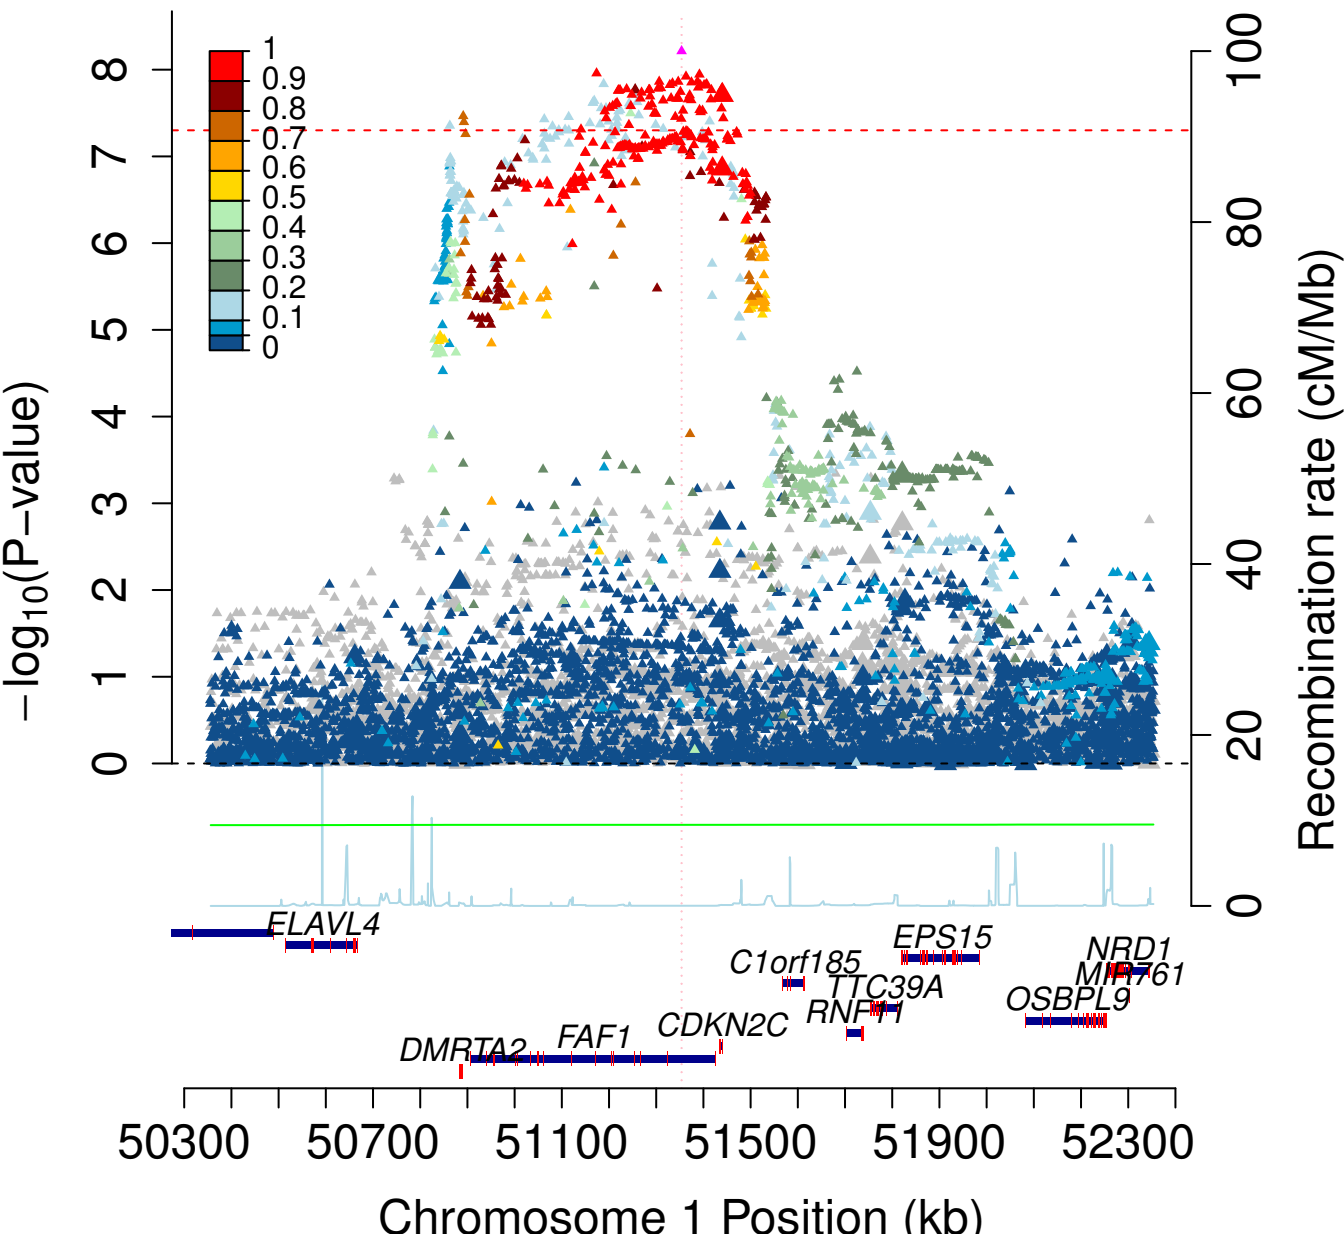

rs55878063 – HDL G

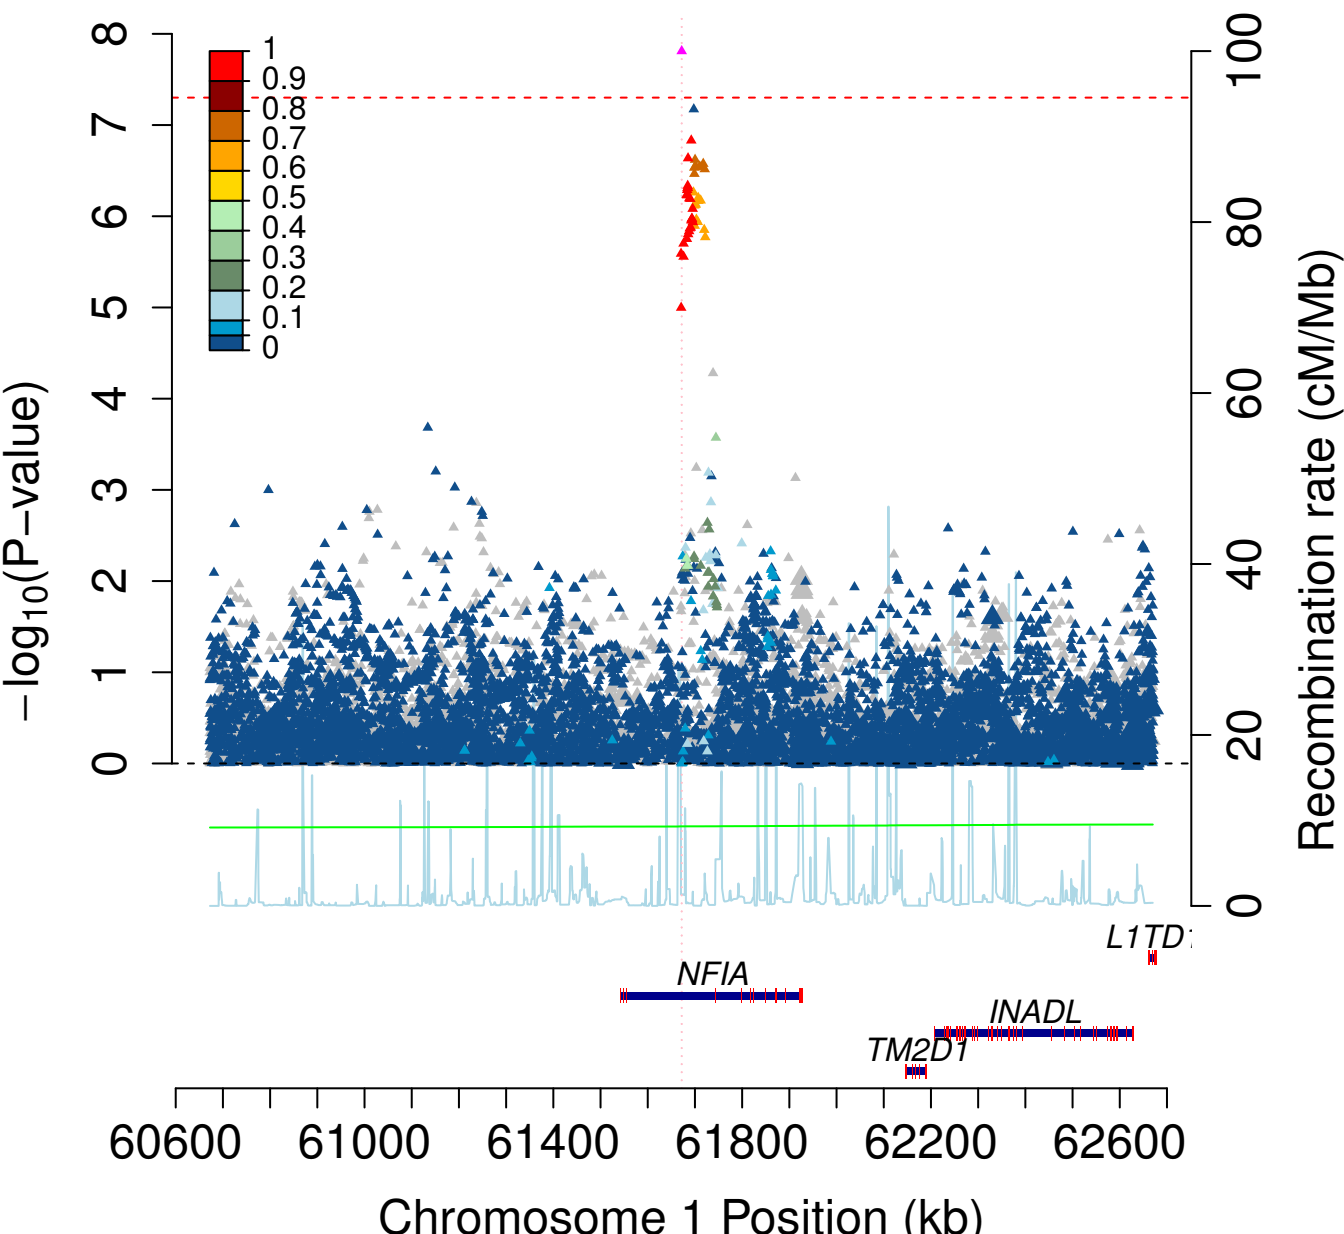

## chr1:93837780:D – HDL G

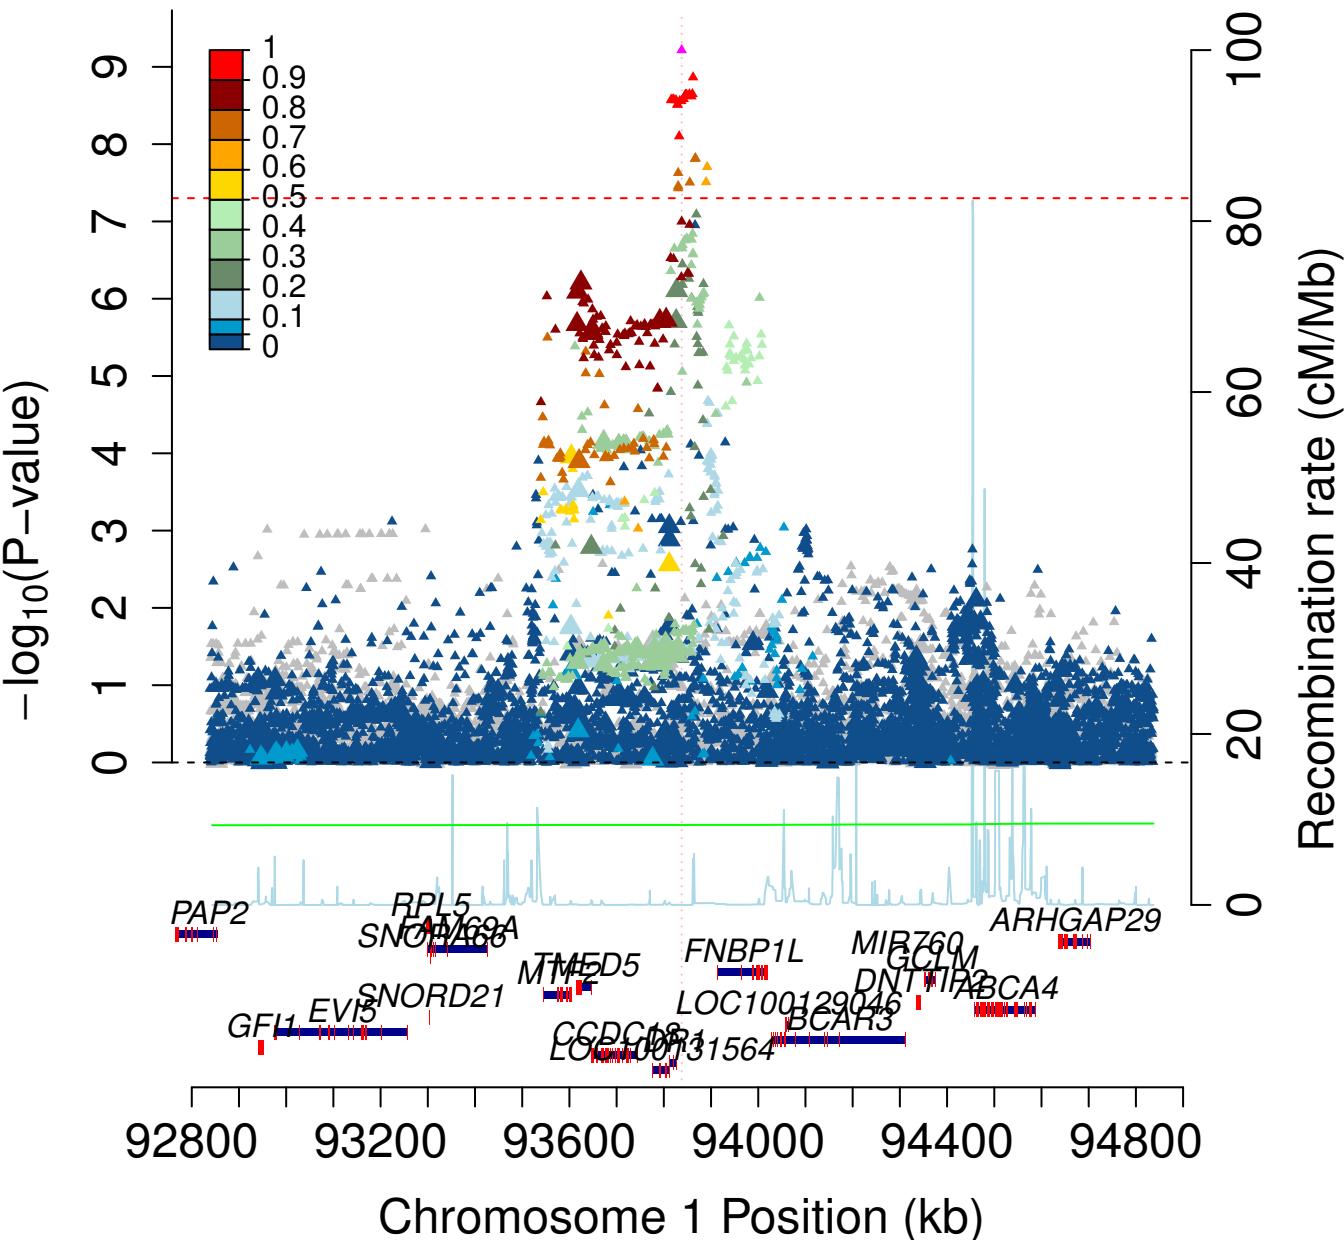

## rs1730859 – LDL GG

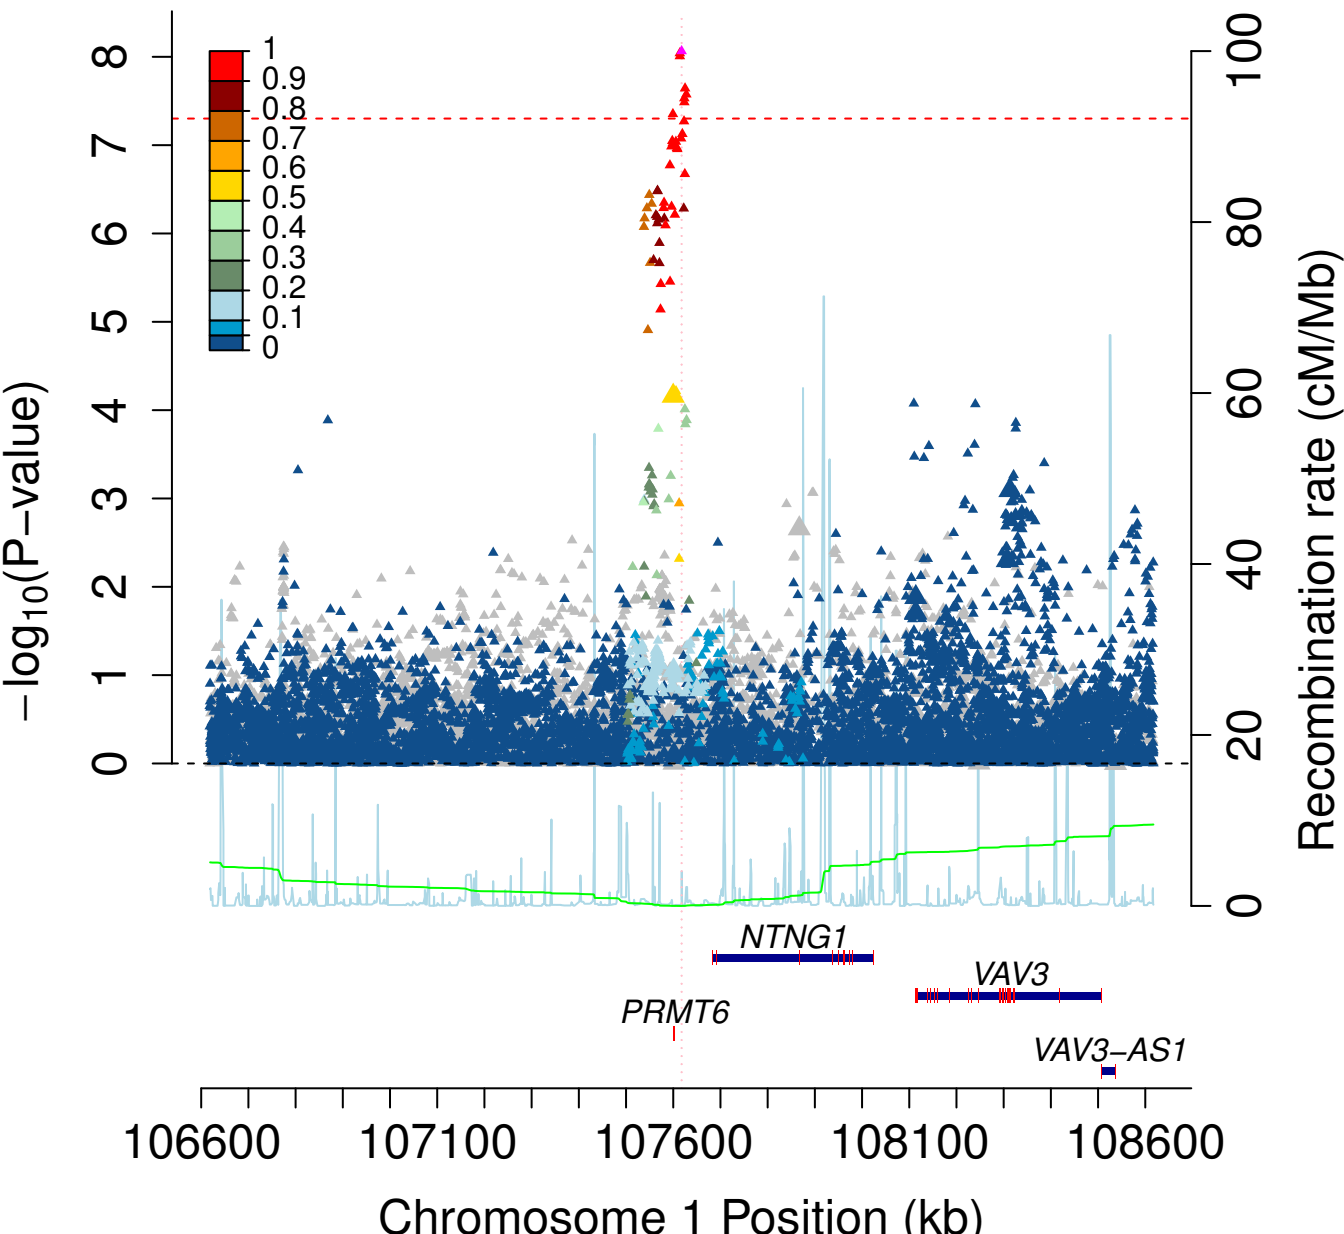

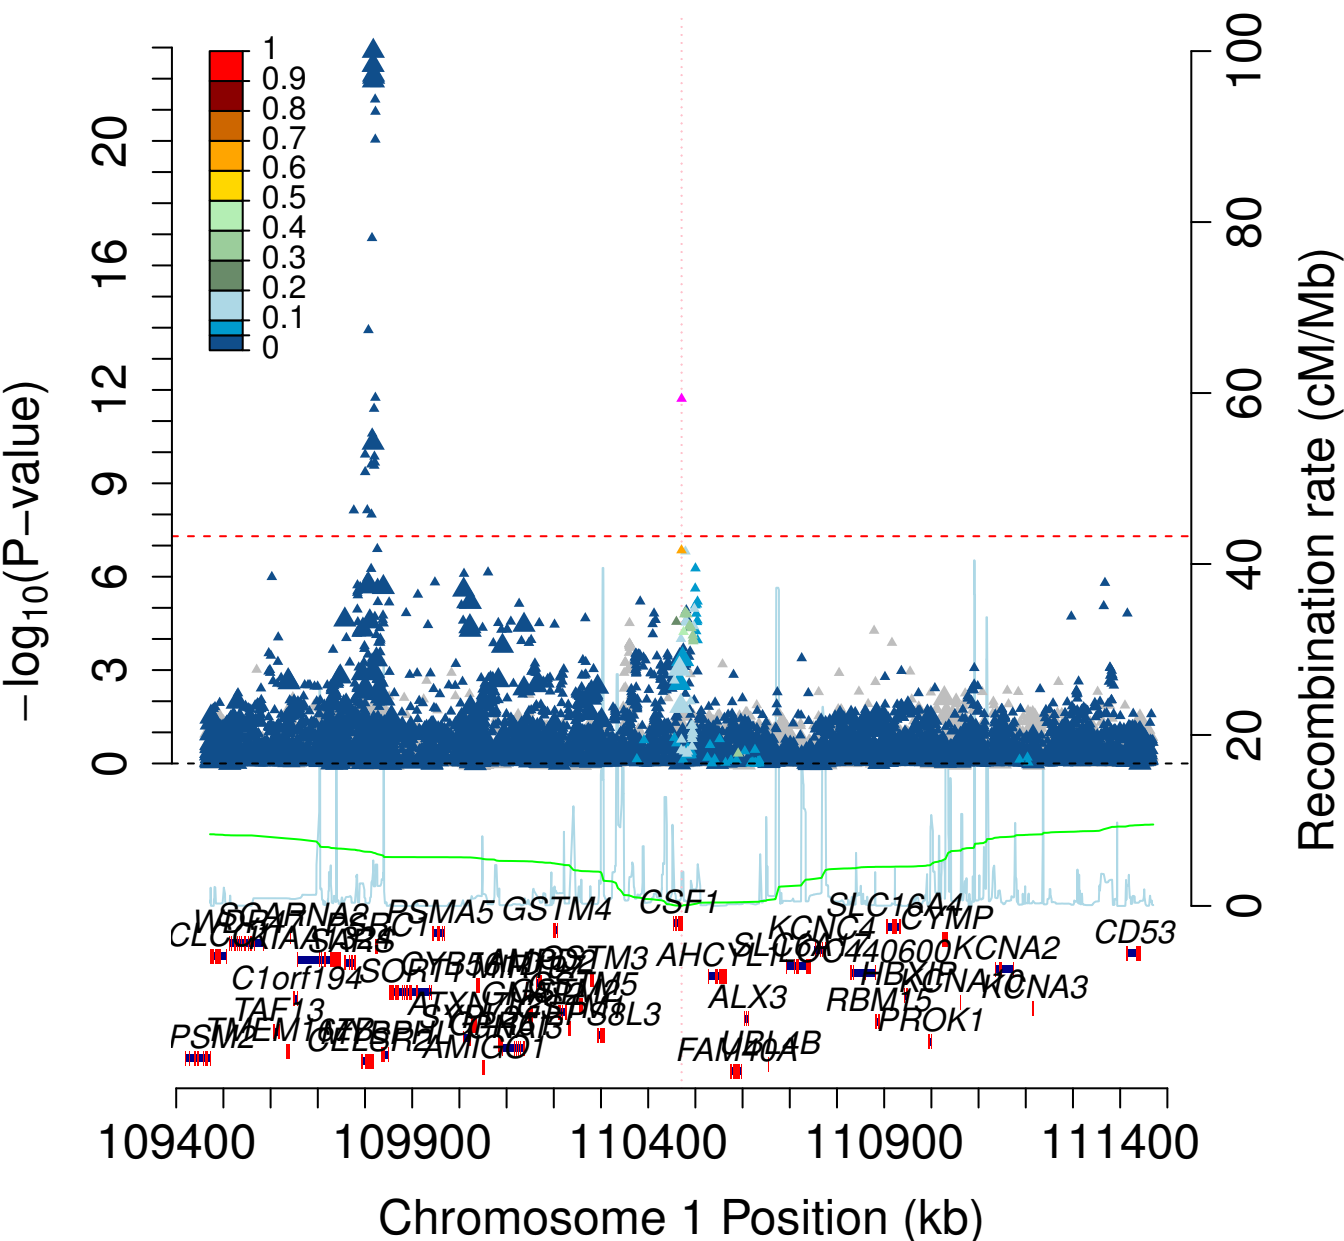

rs6671166 – TG GG

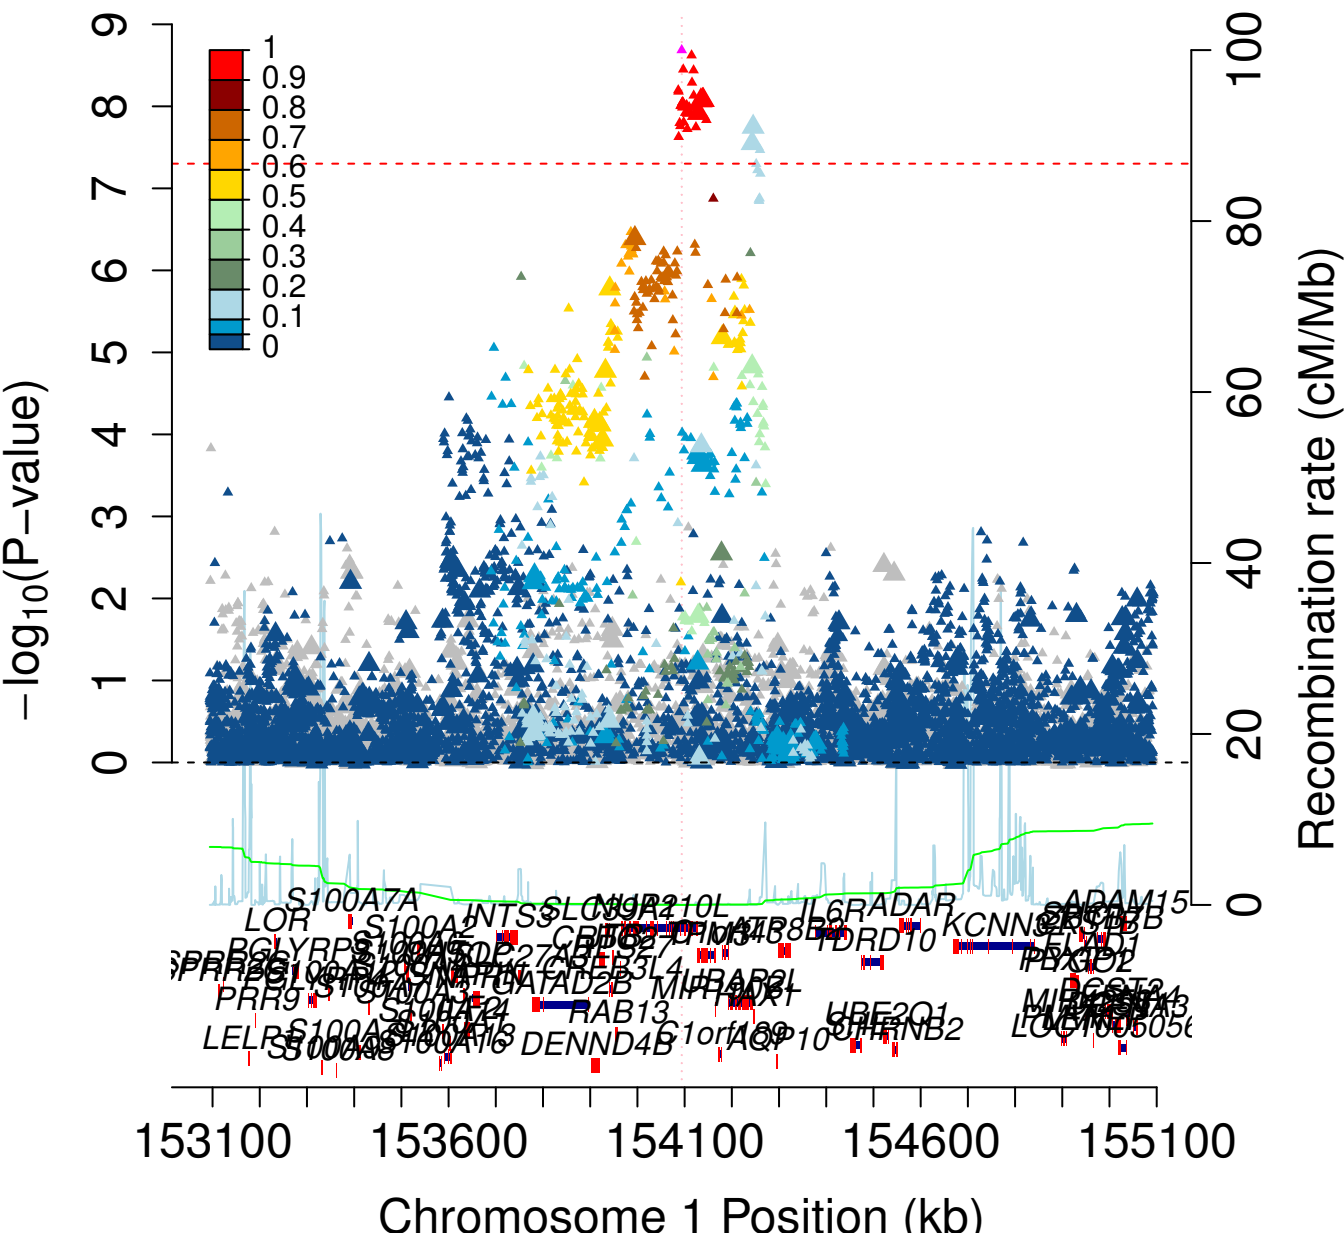

## rs373579 – TC GG

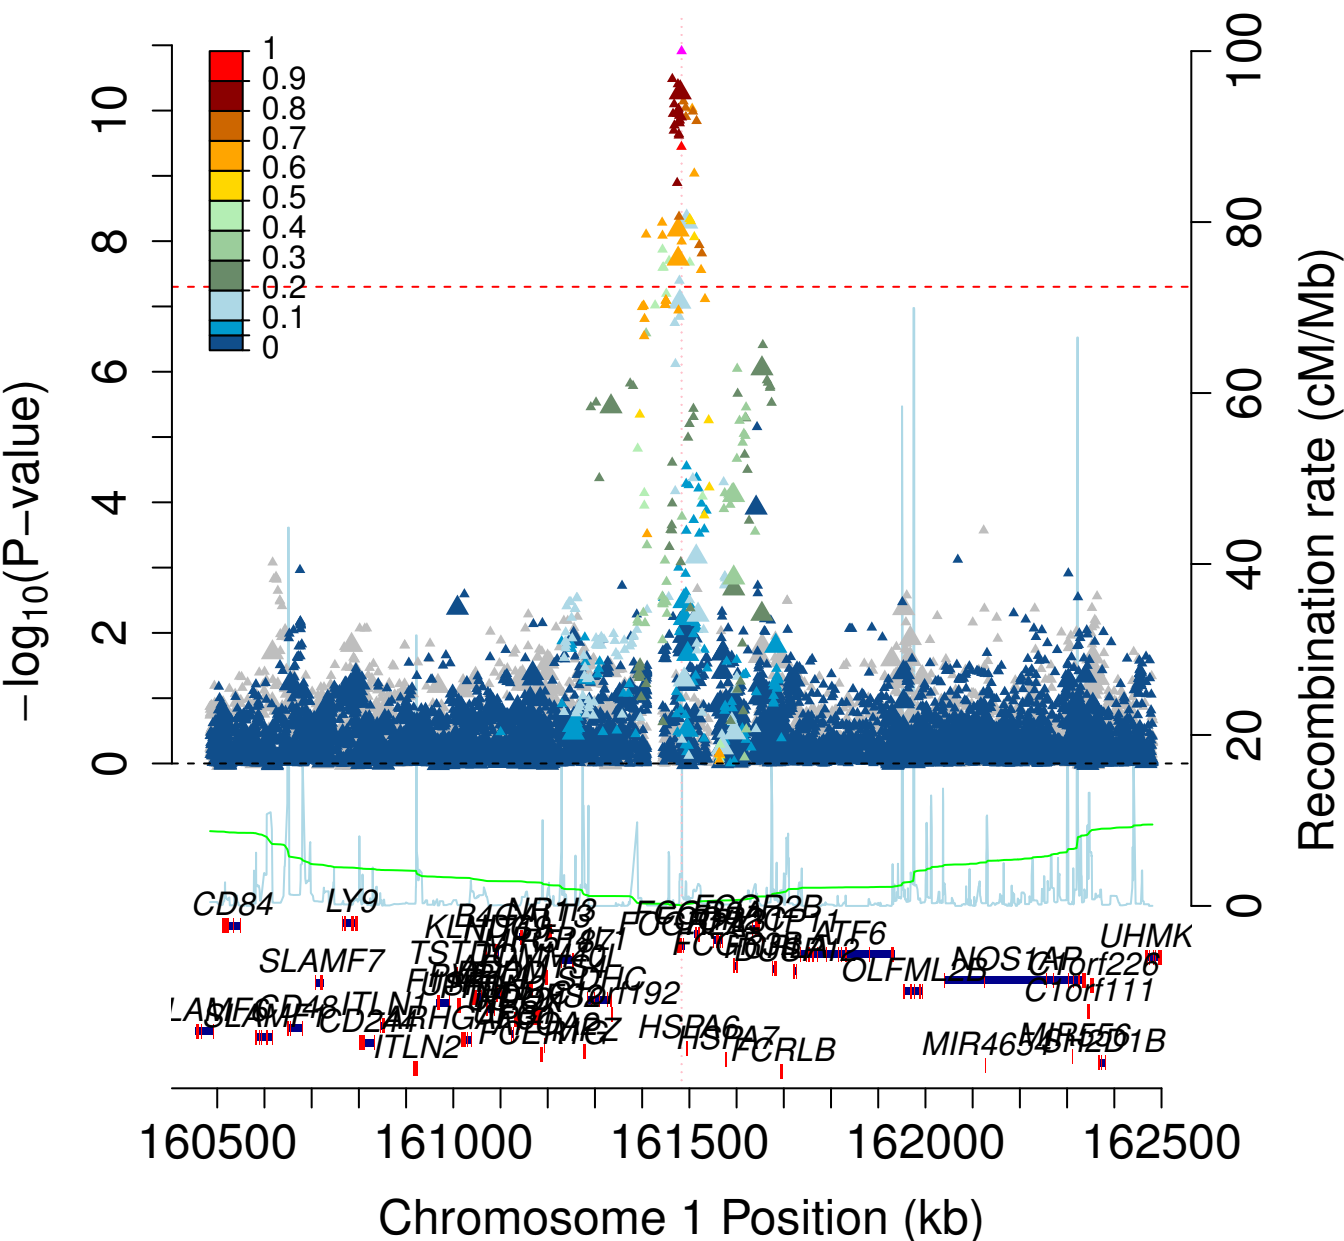



rs7519429 – TG G

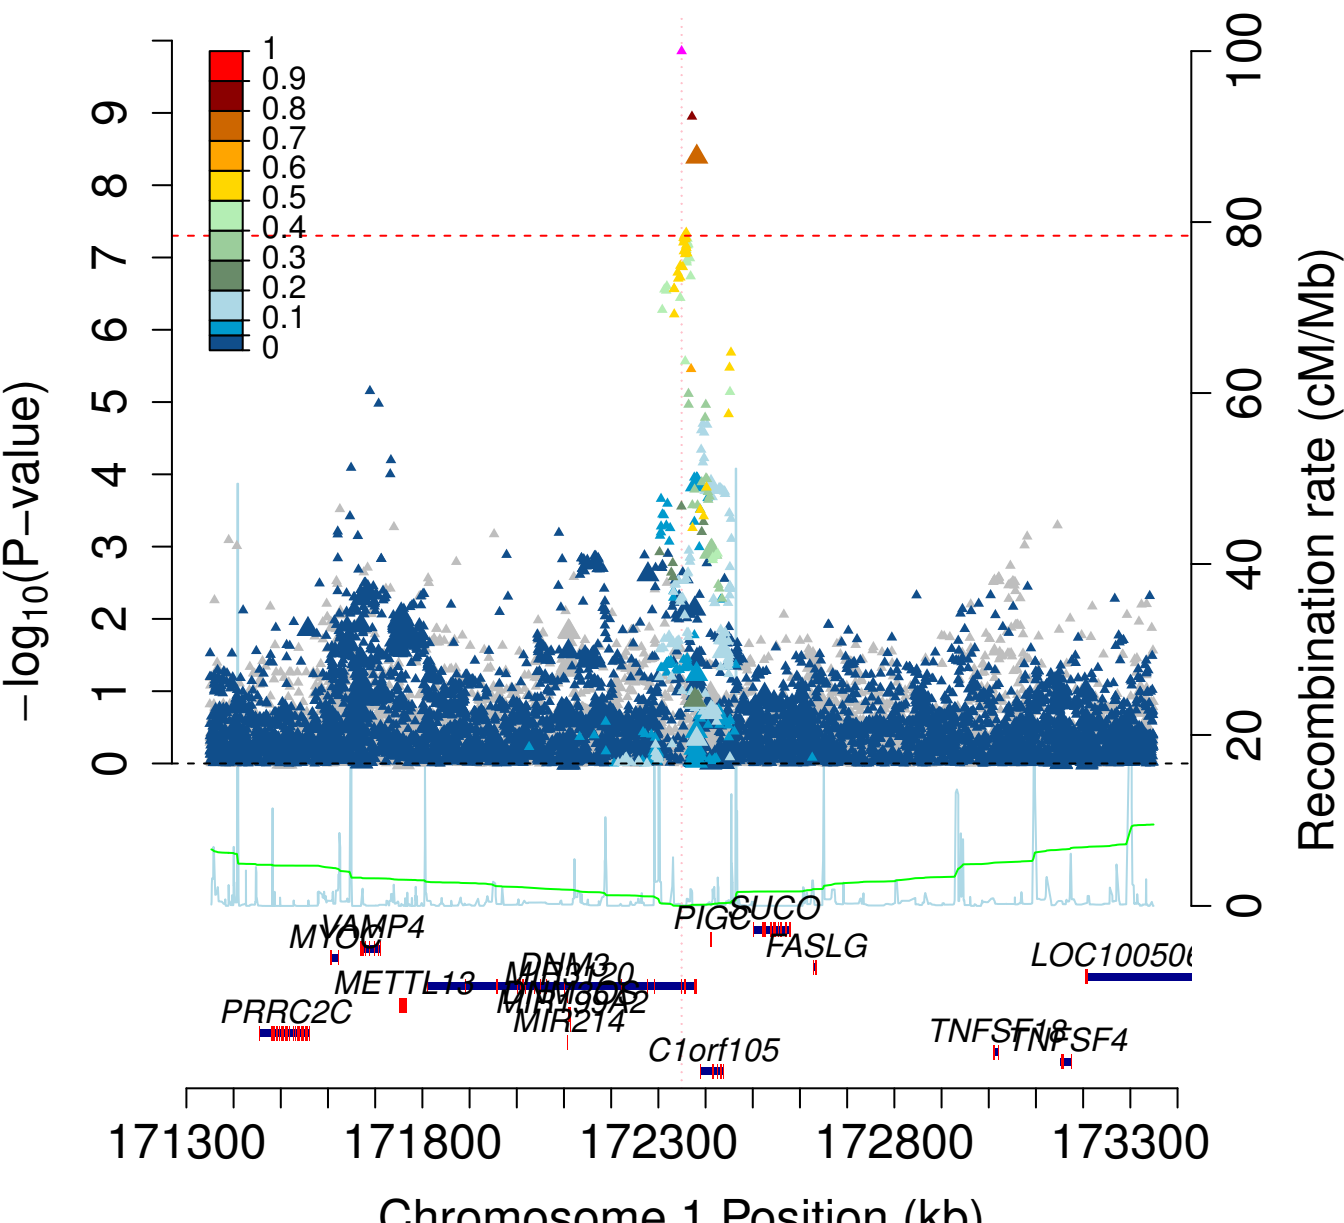

## rs4651135 – TC G

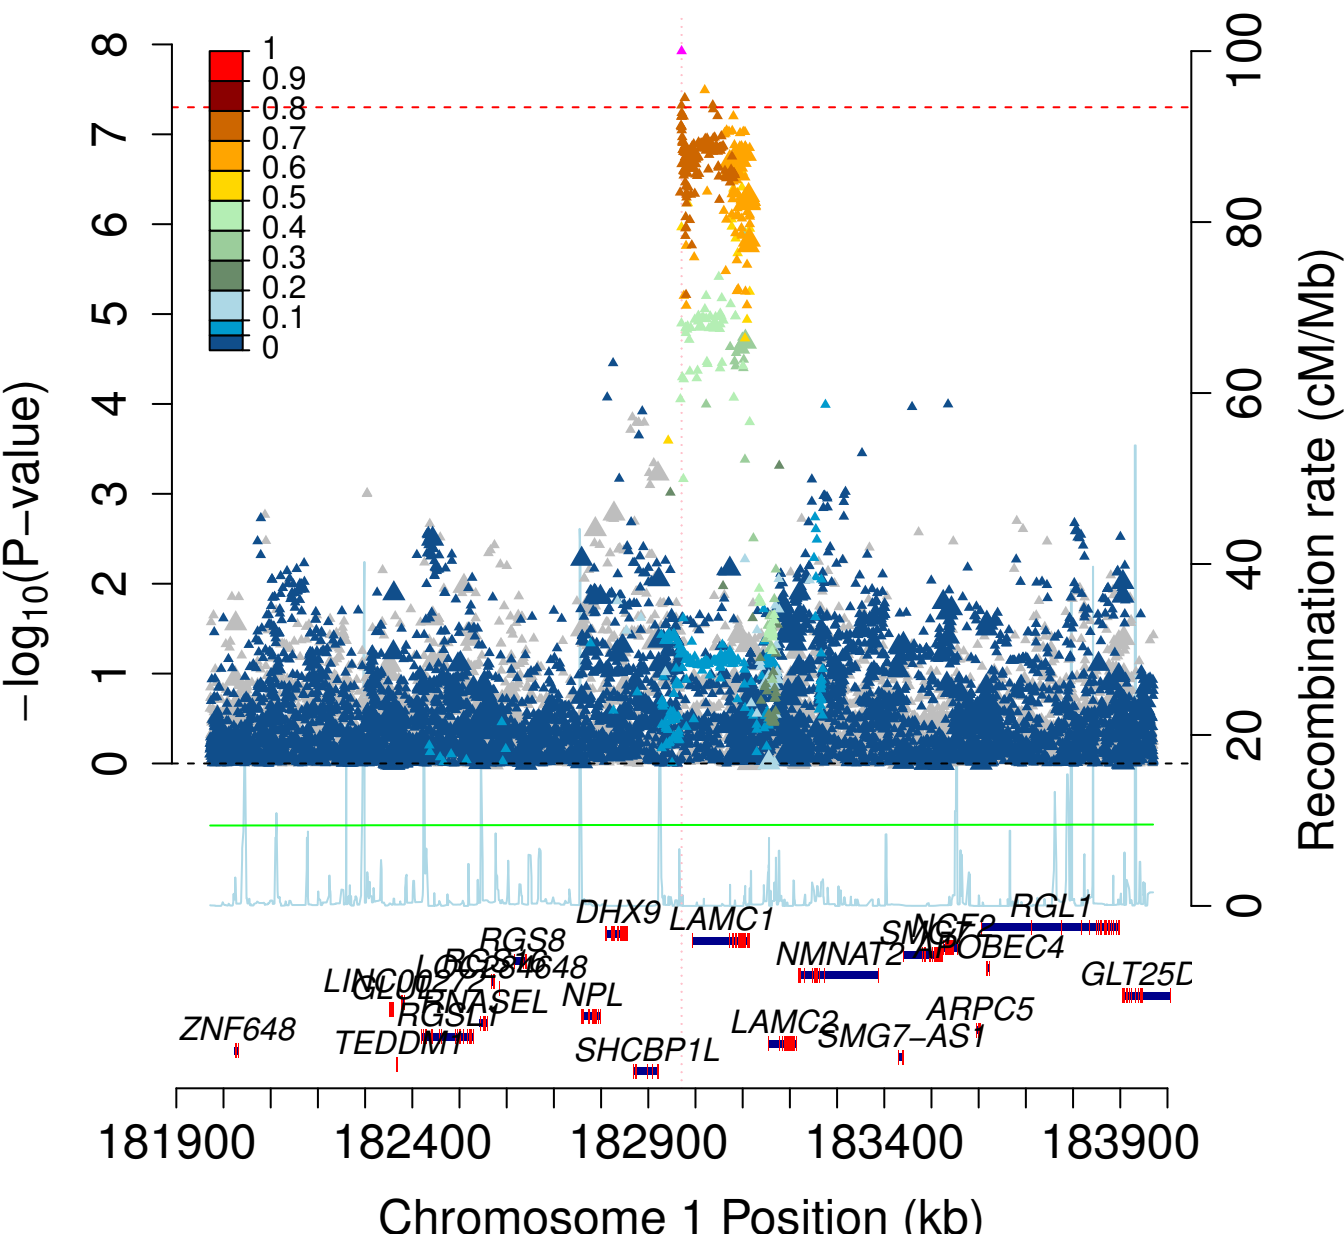



rs2791547 – TG G

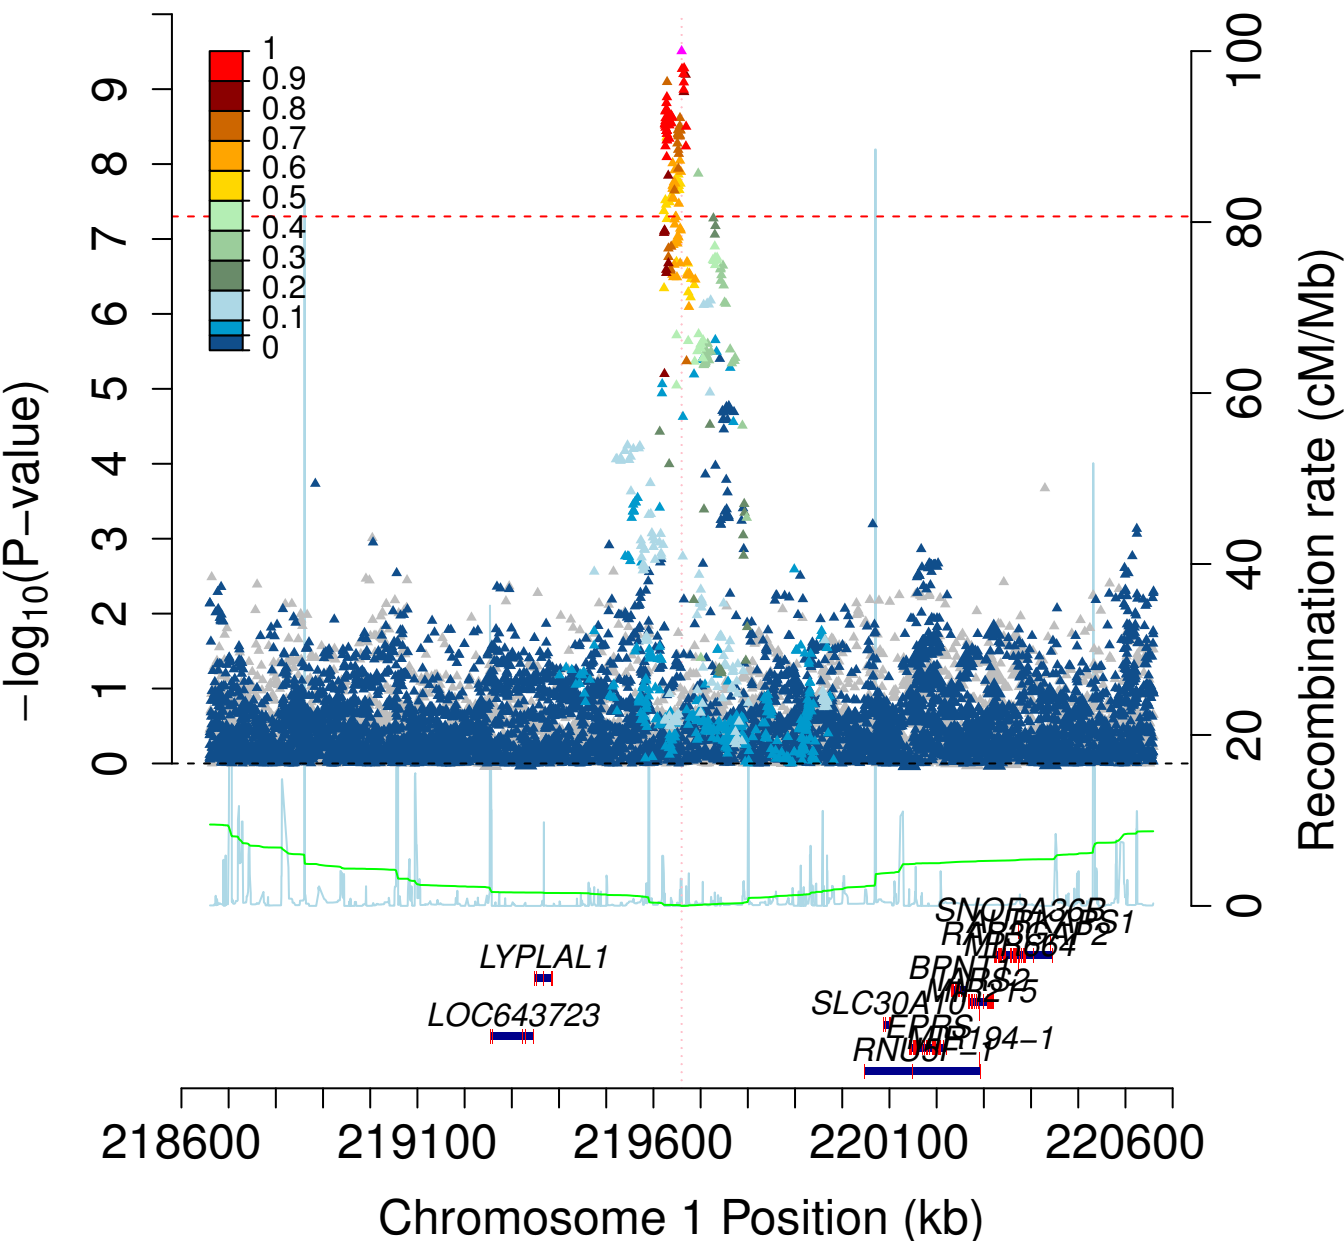

rs2280334 – TG GG

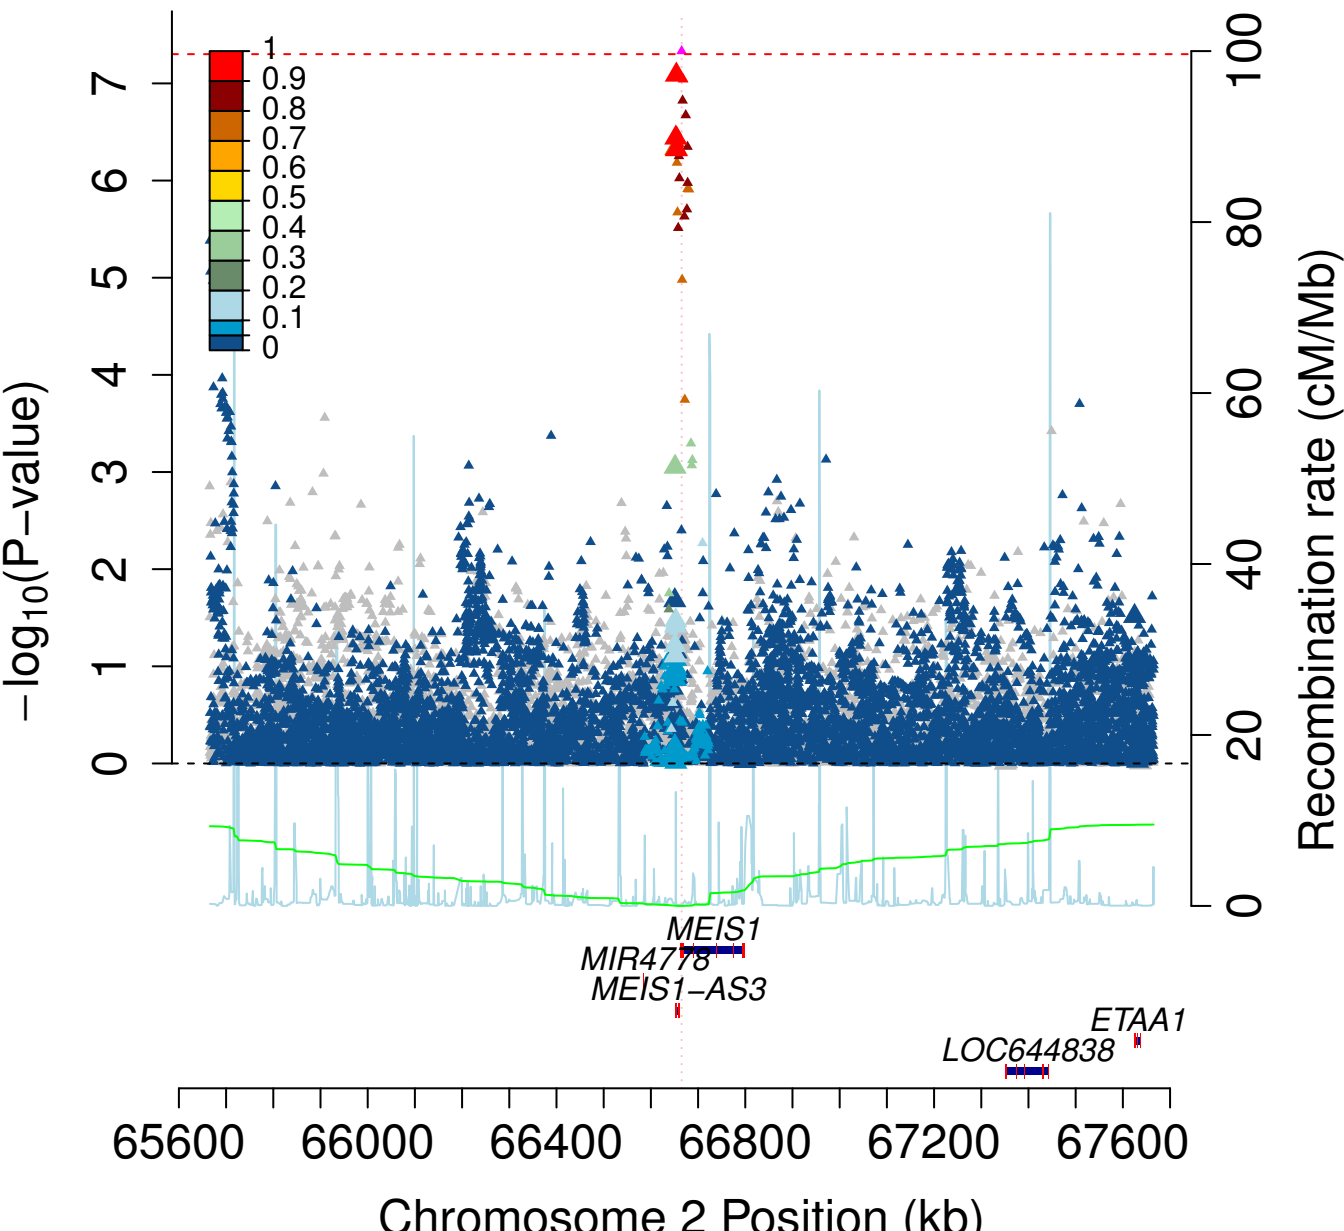

rs2706770 – TC G

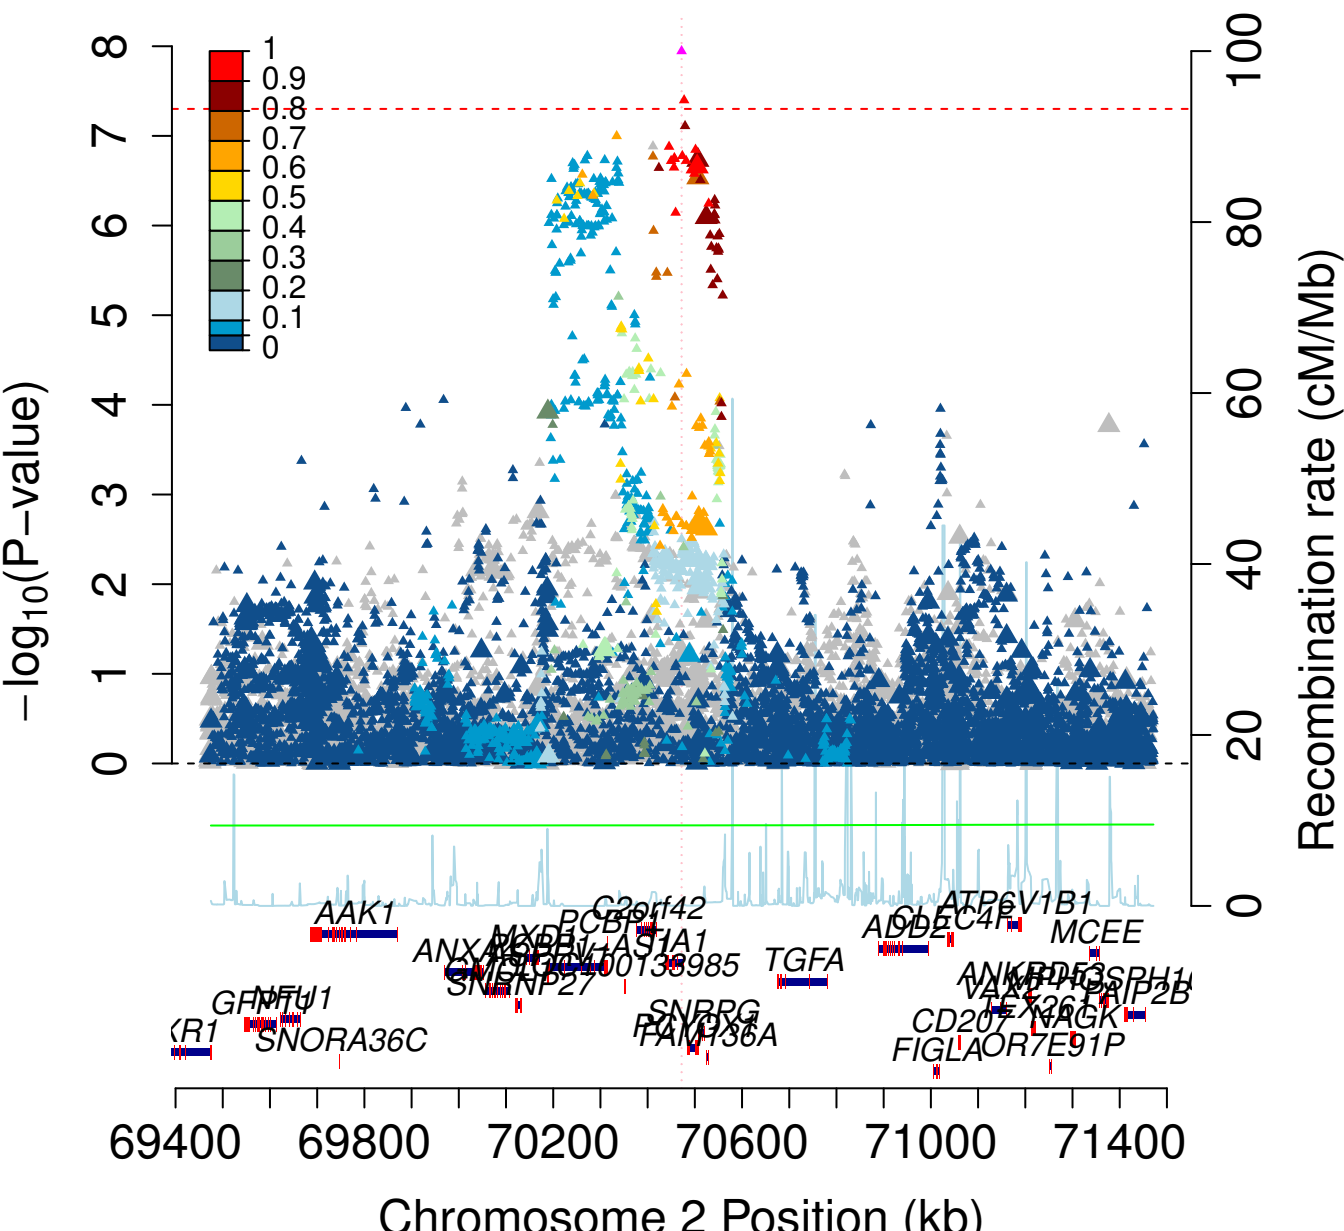



## rs826681 – LDL GG

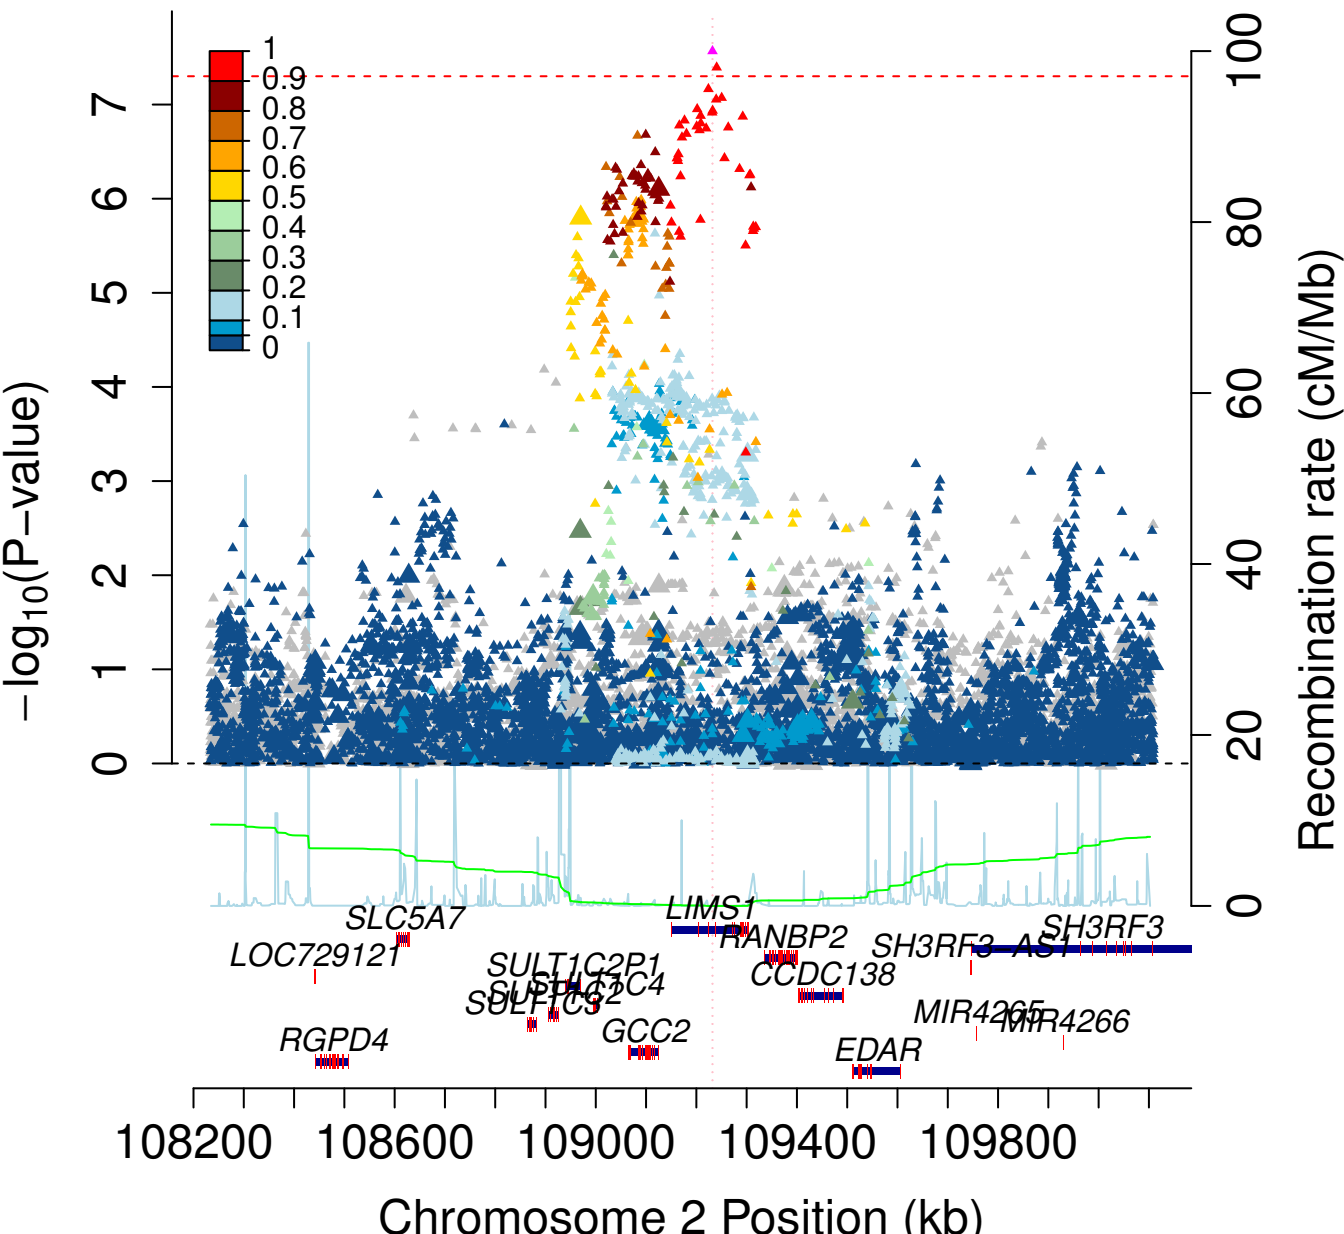







## rs17576323 – HDL GG

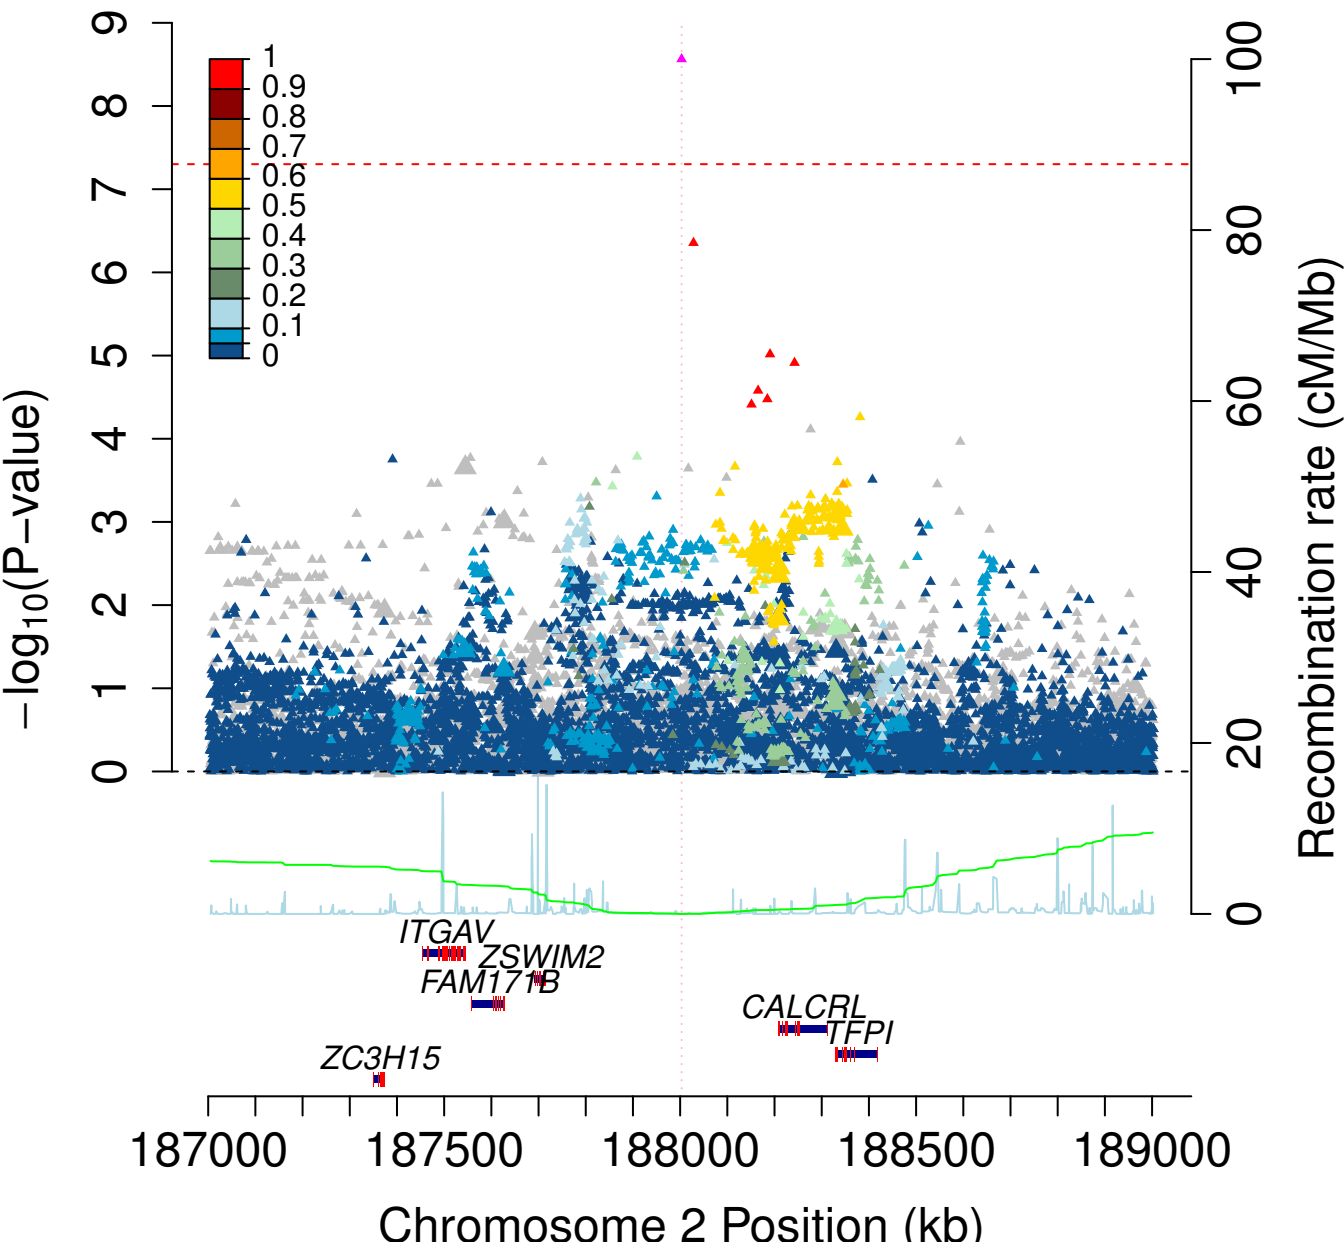

## rs6792725 – TG GG

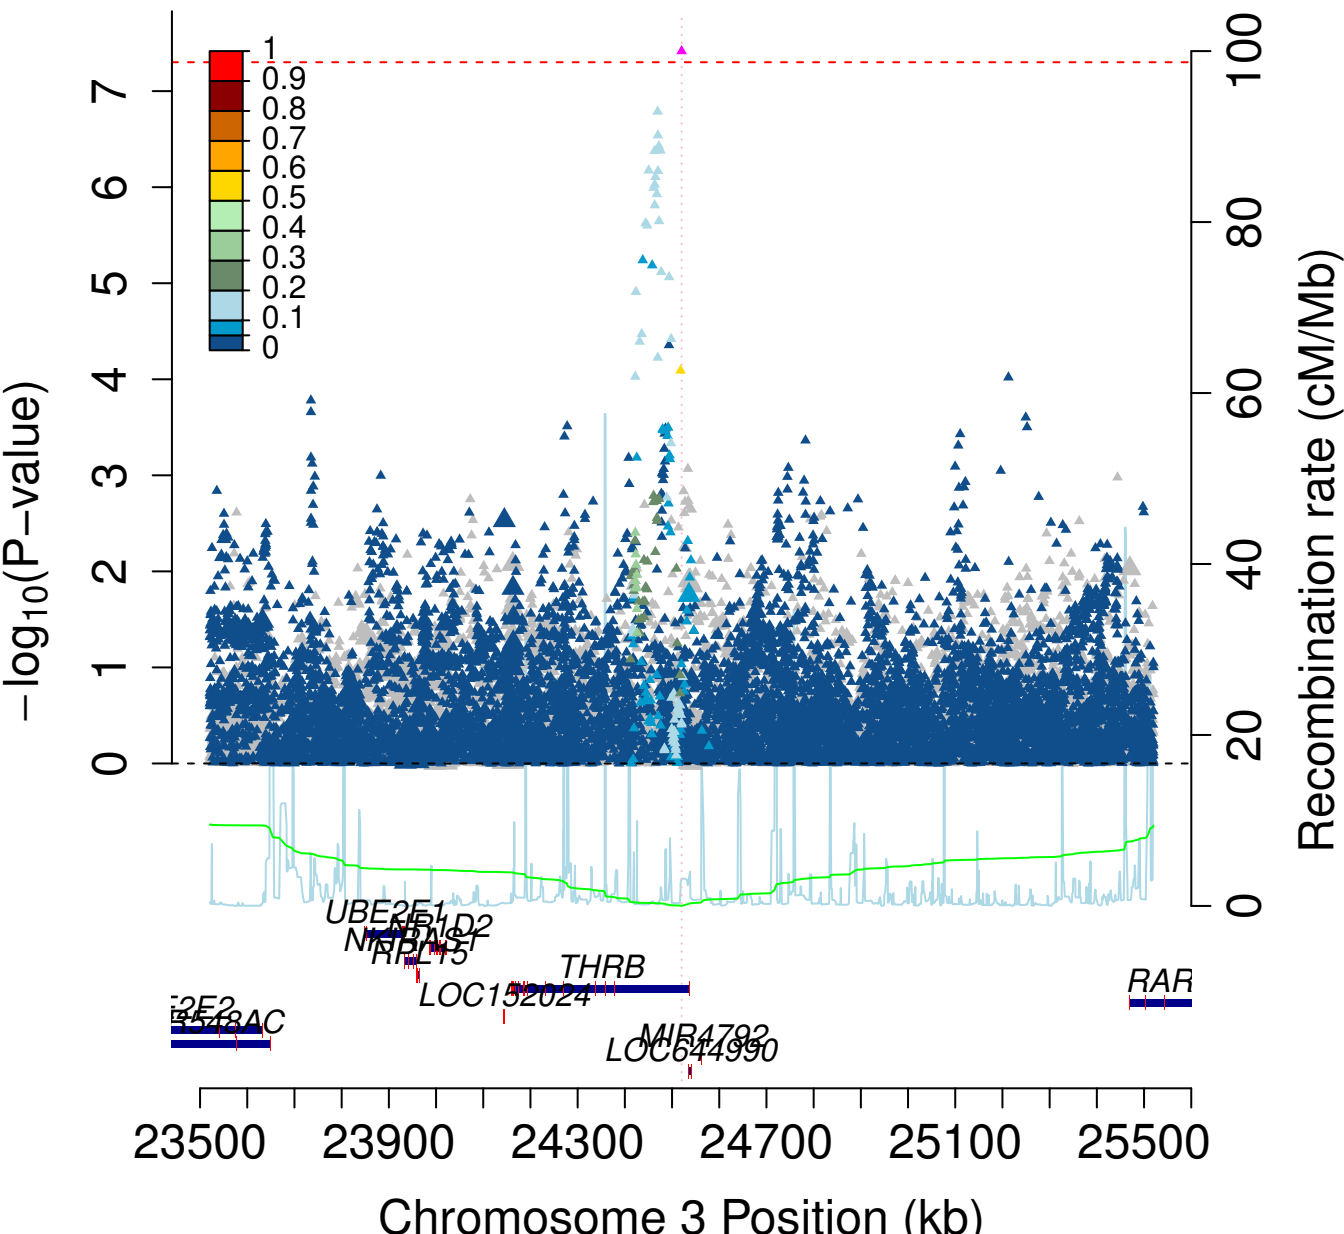

## chr3:122176238:D - LDL G

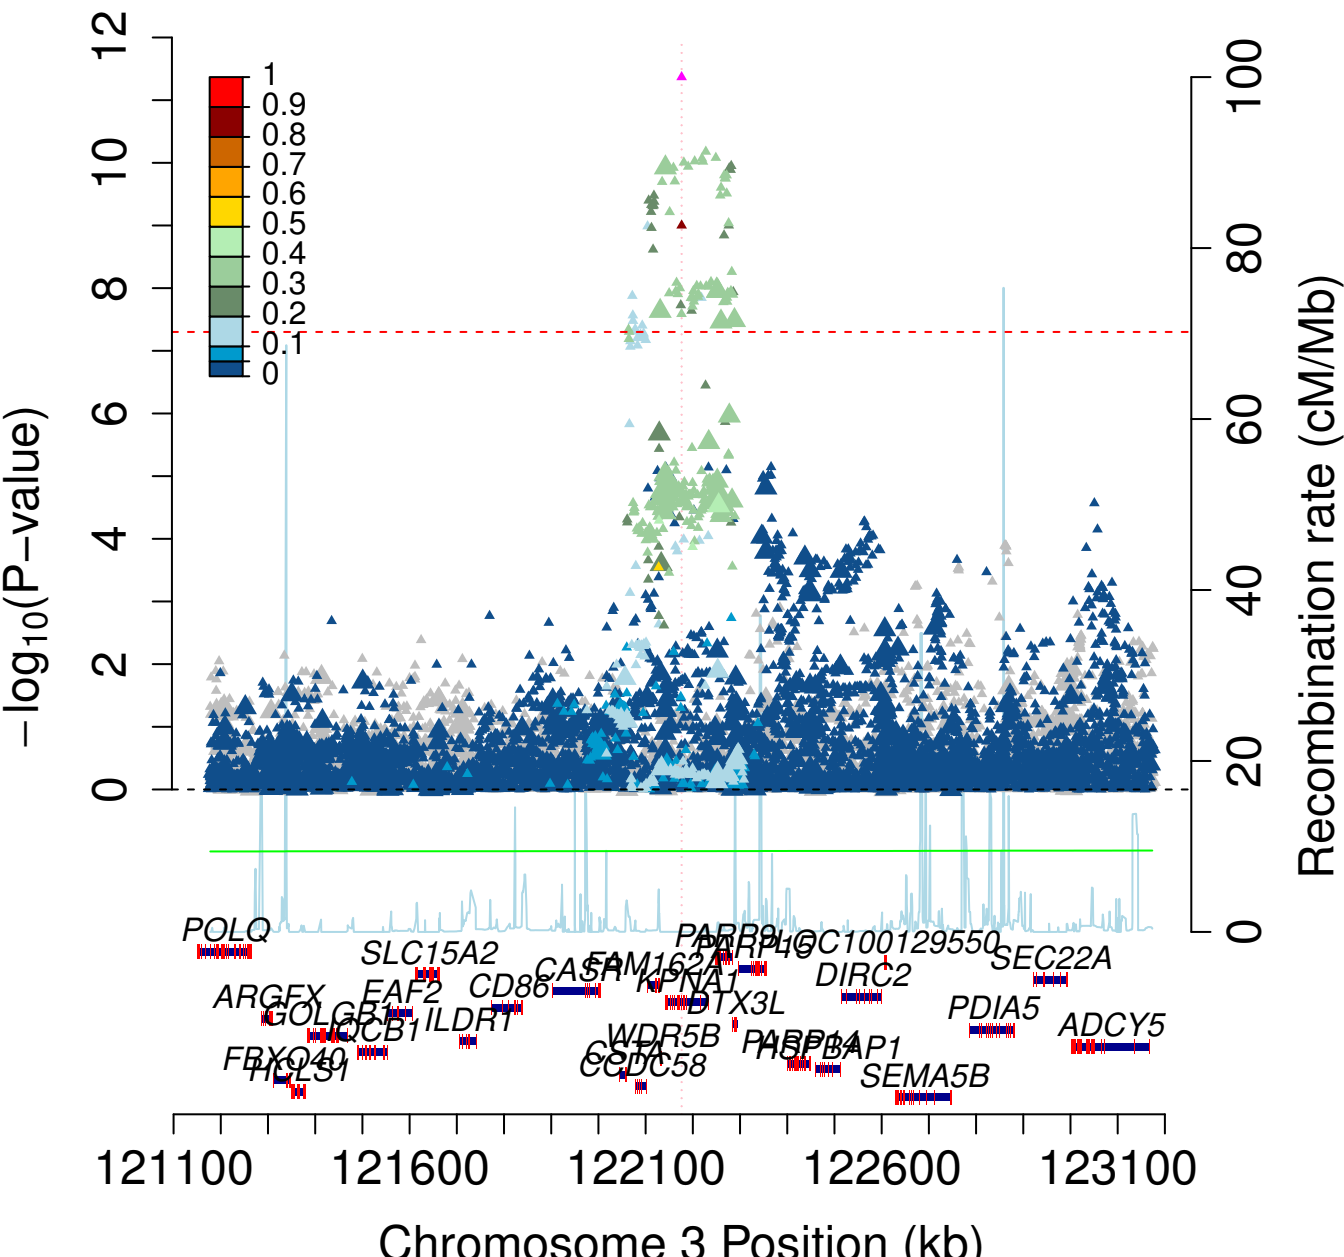

## rs7614016 – HDL GG

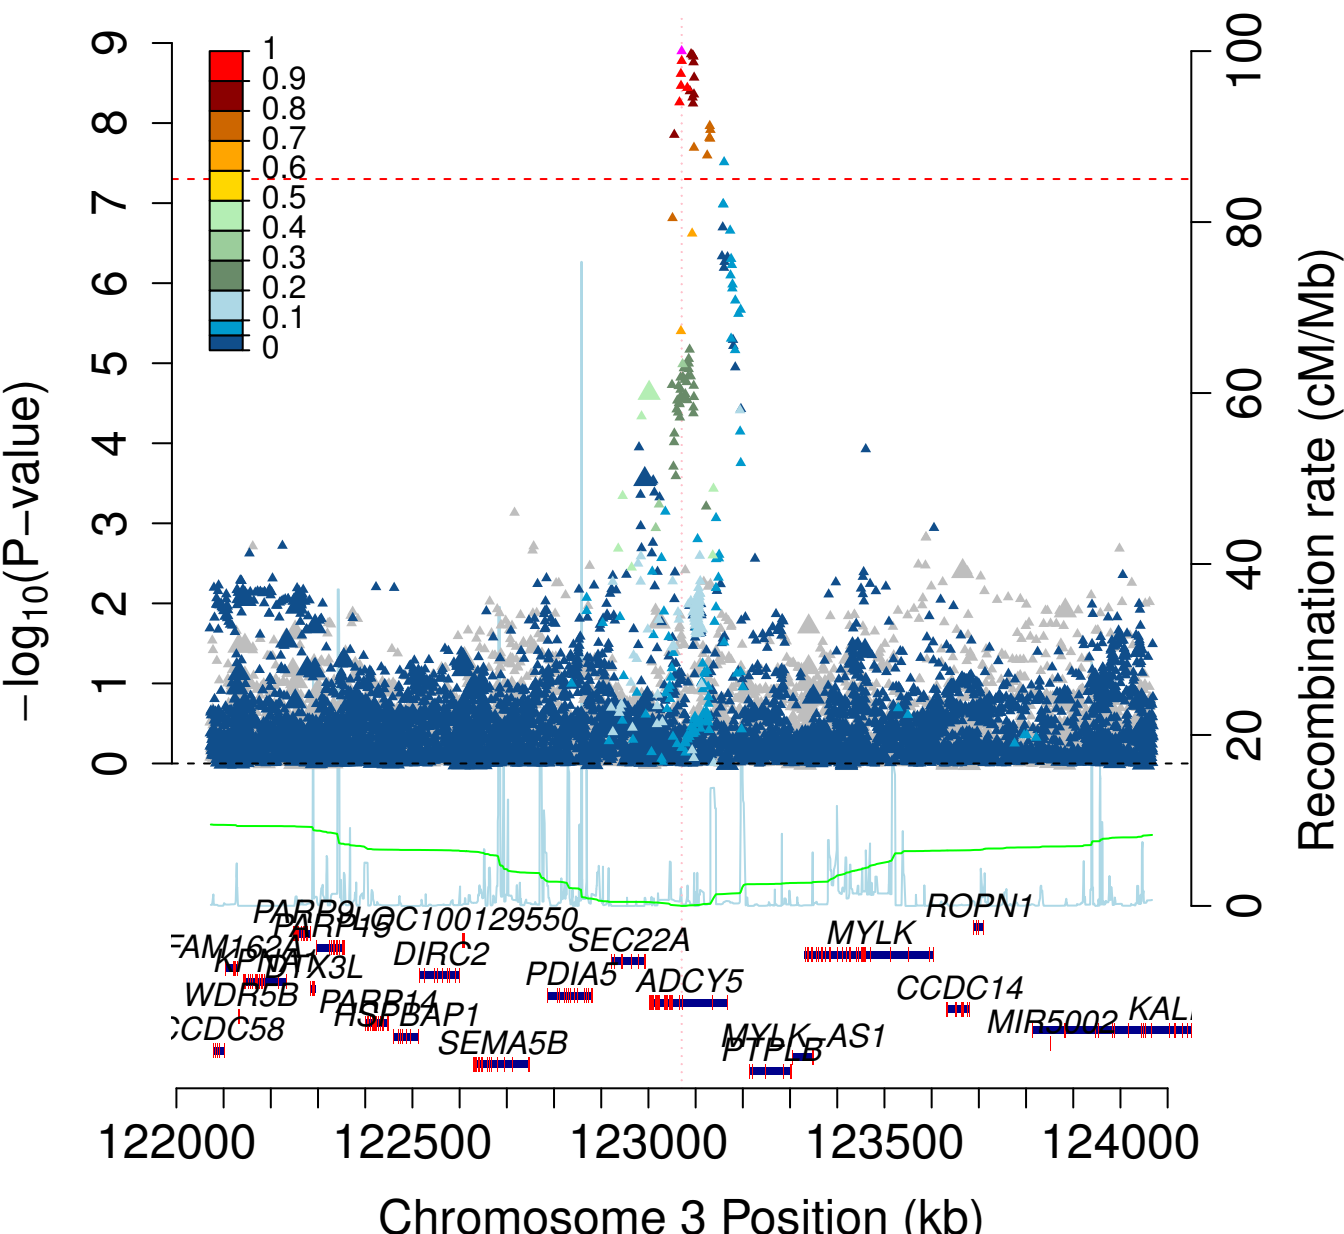

rs4683438 – TG GG

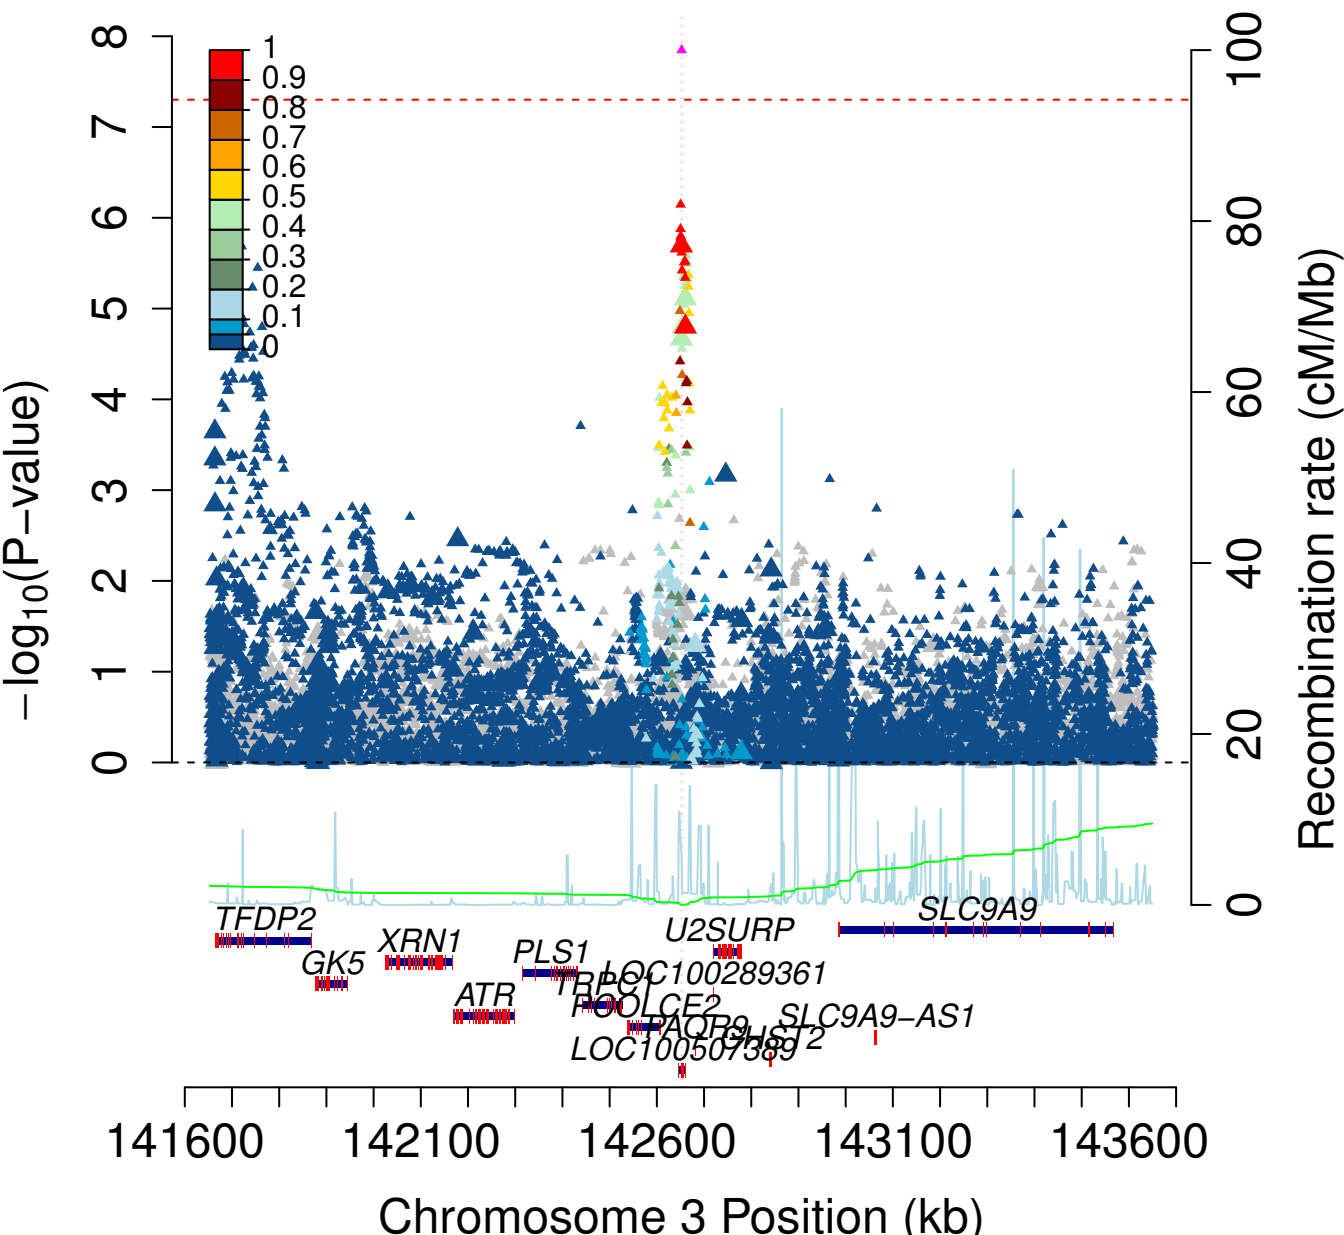

rs78086267 – TG G

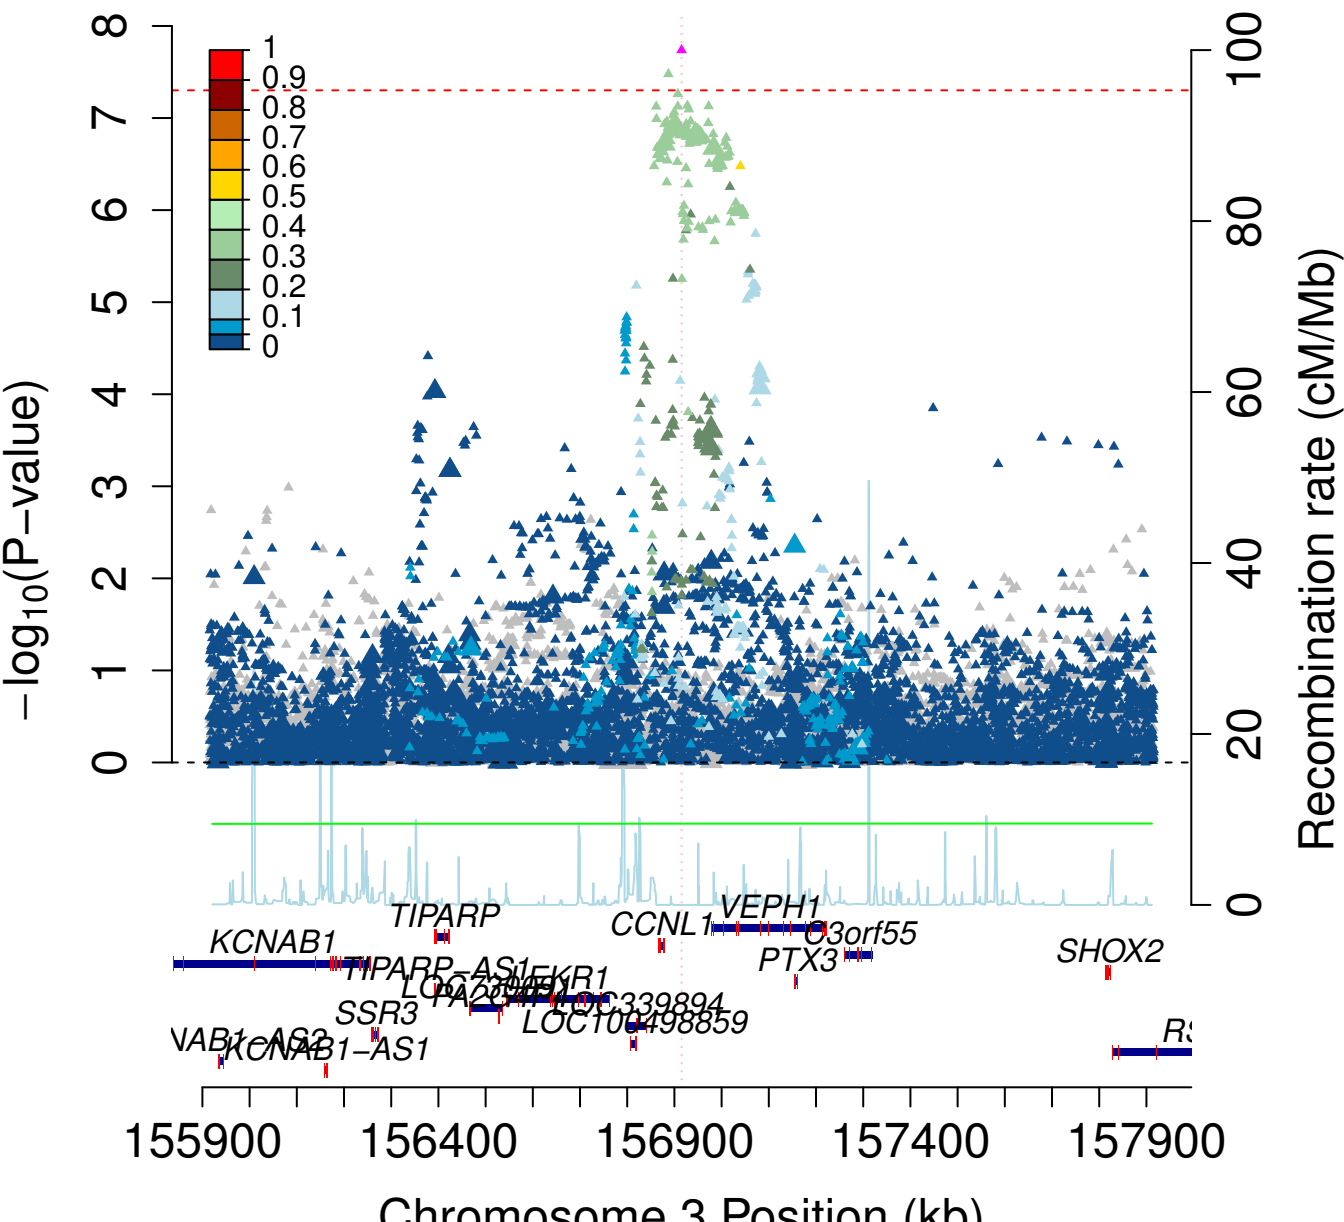



rs56394279 – TC GG

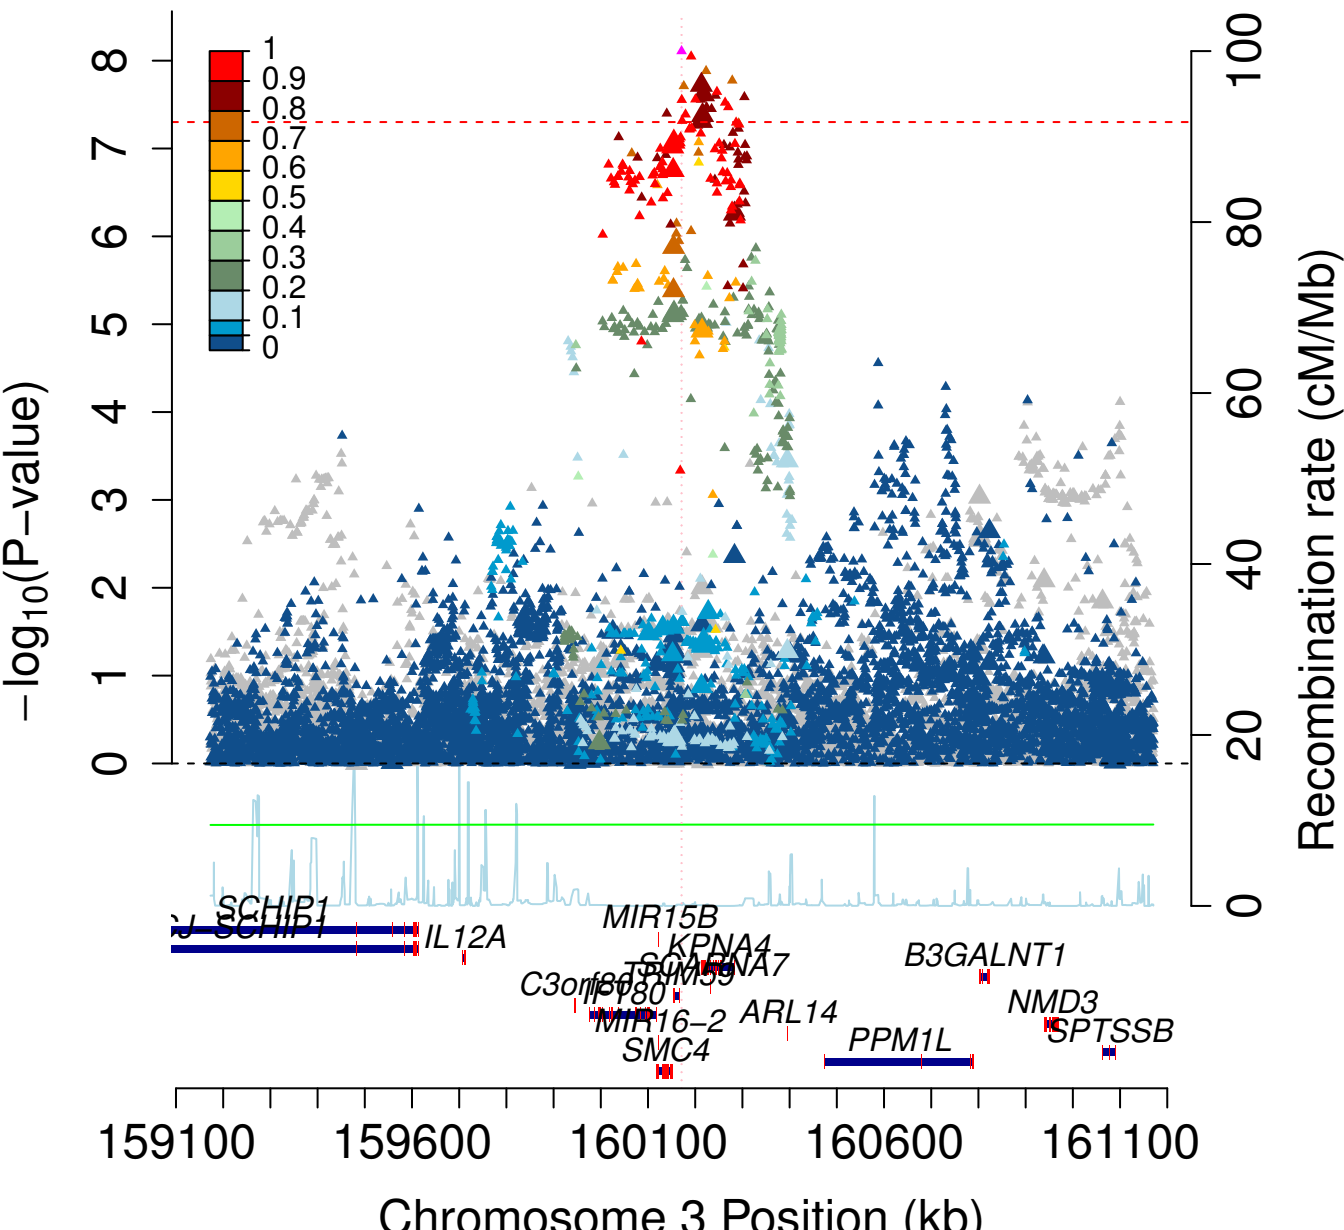

## rs112545201 – HDL G

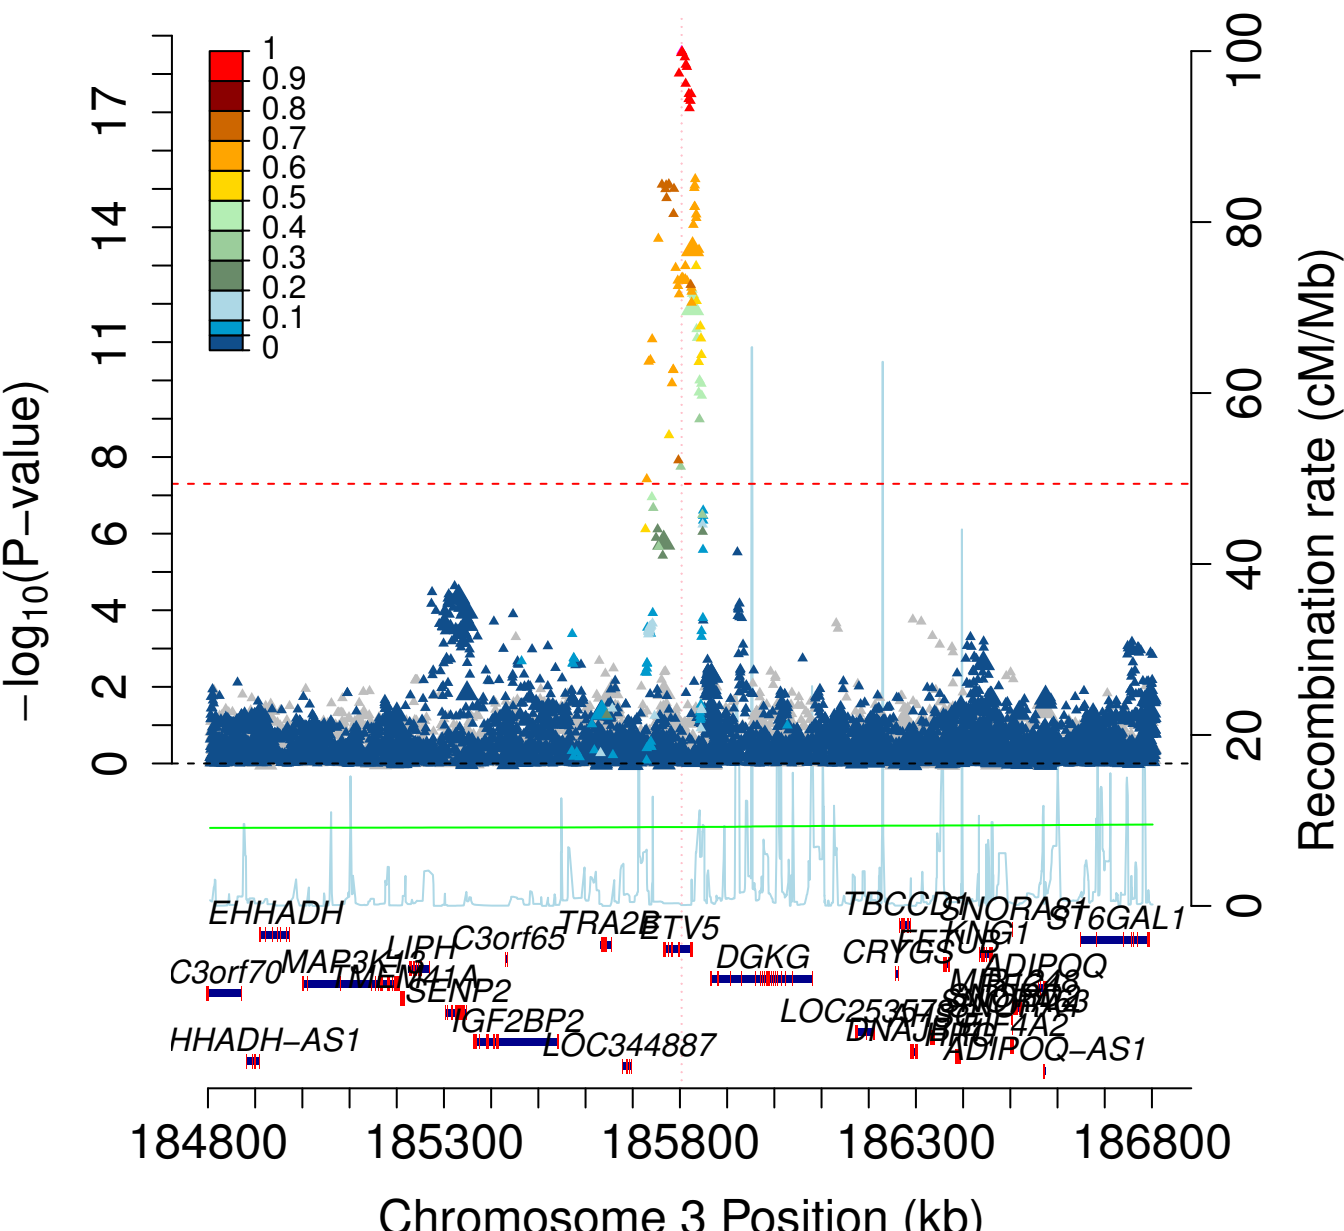

## rs138151052 – TC G

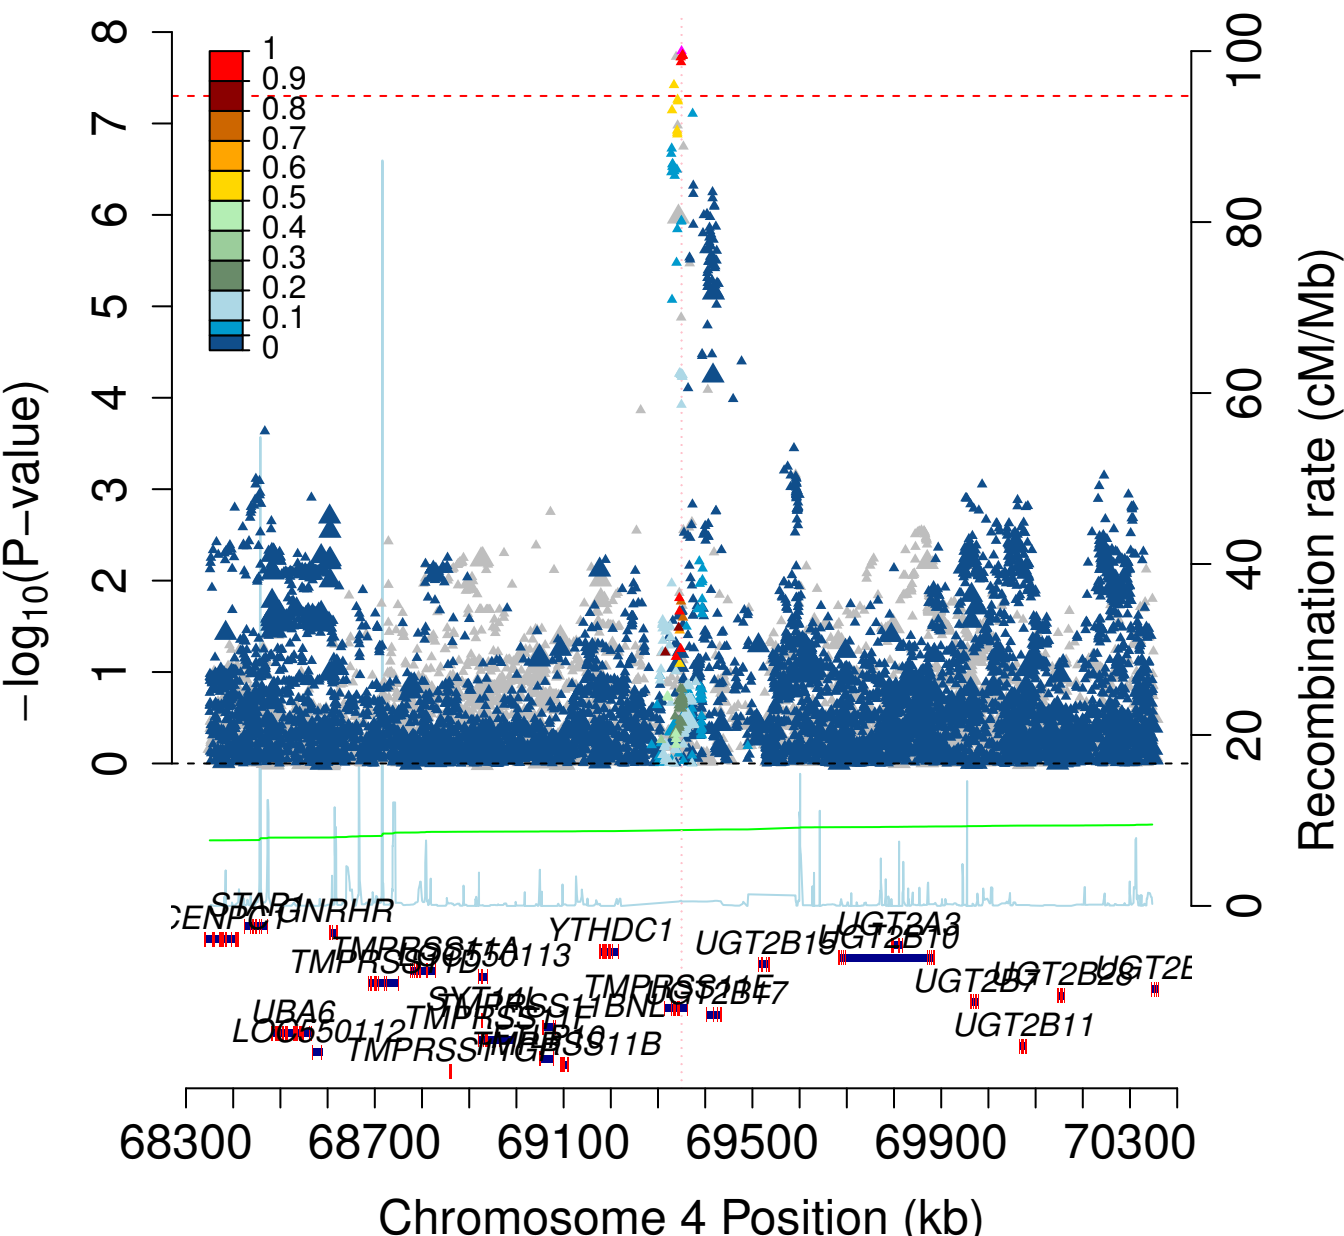

## chr4:106169706:D – HDL G

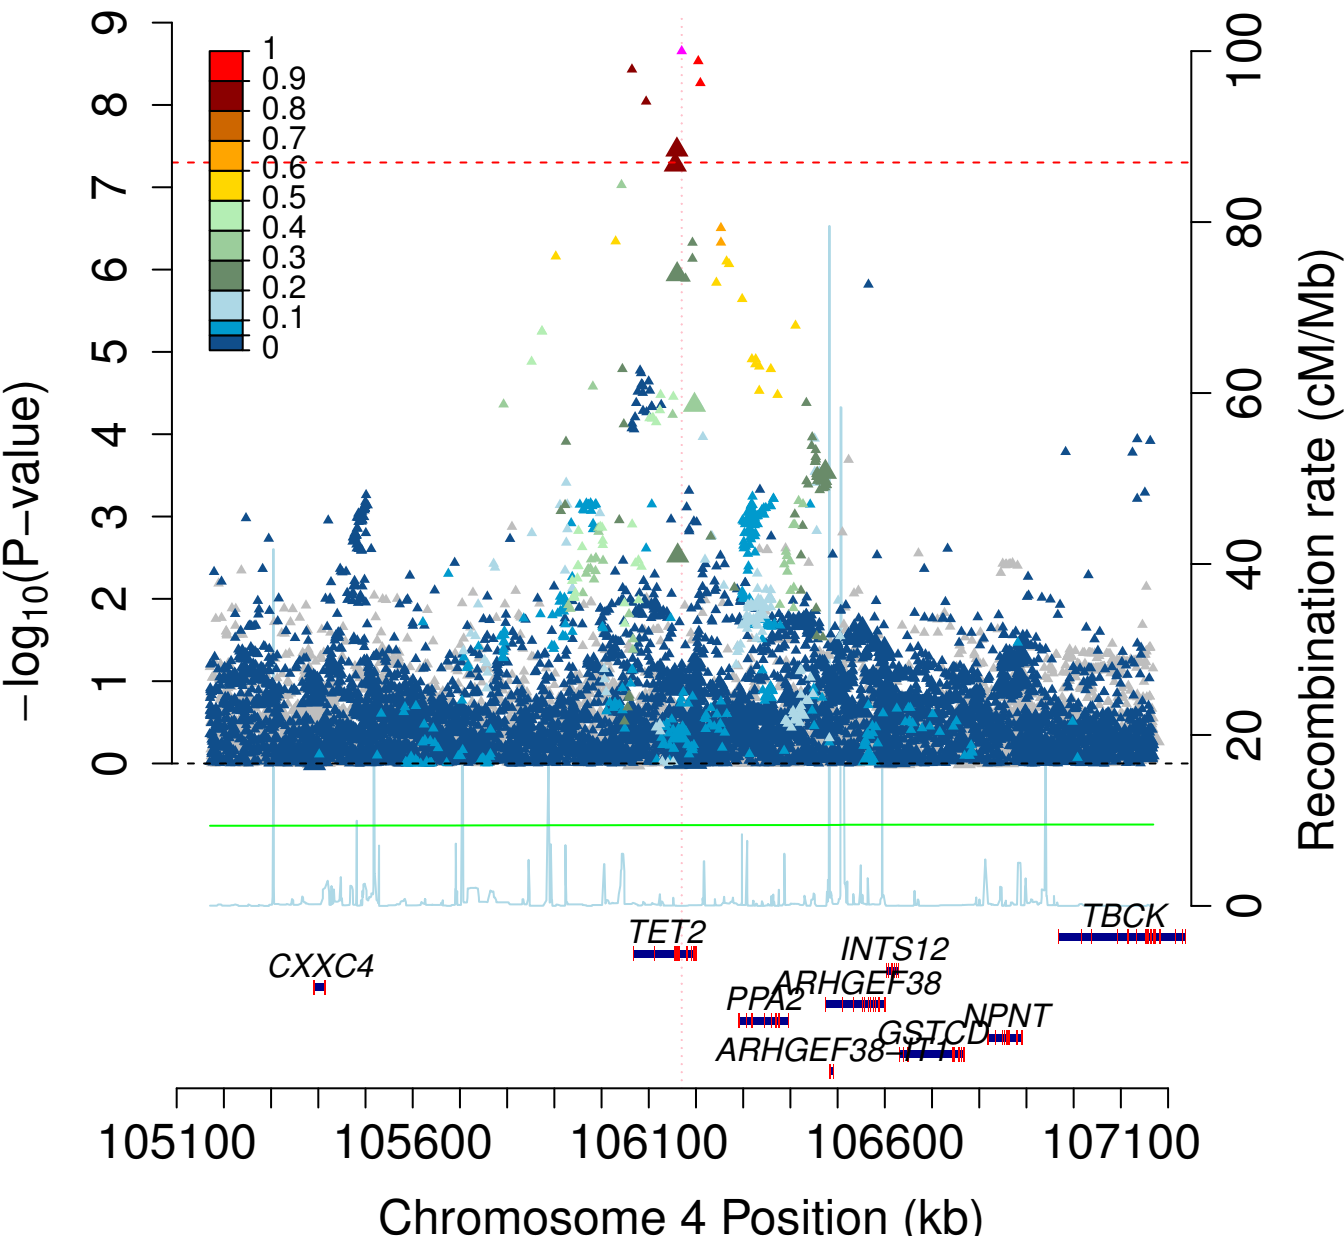

rs2322549 – TG GG

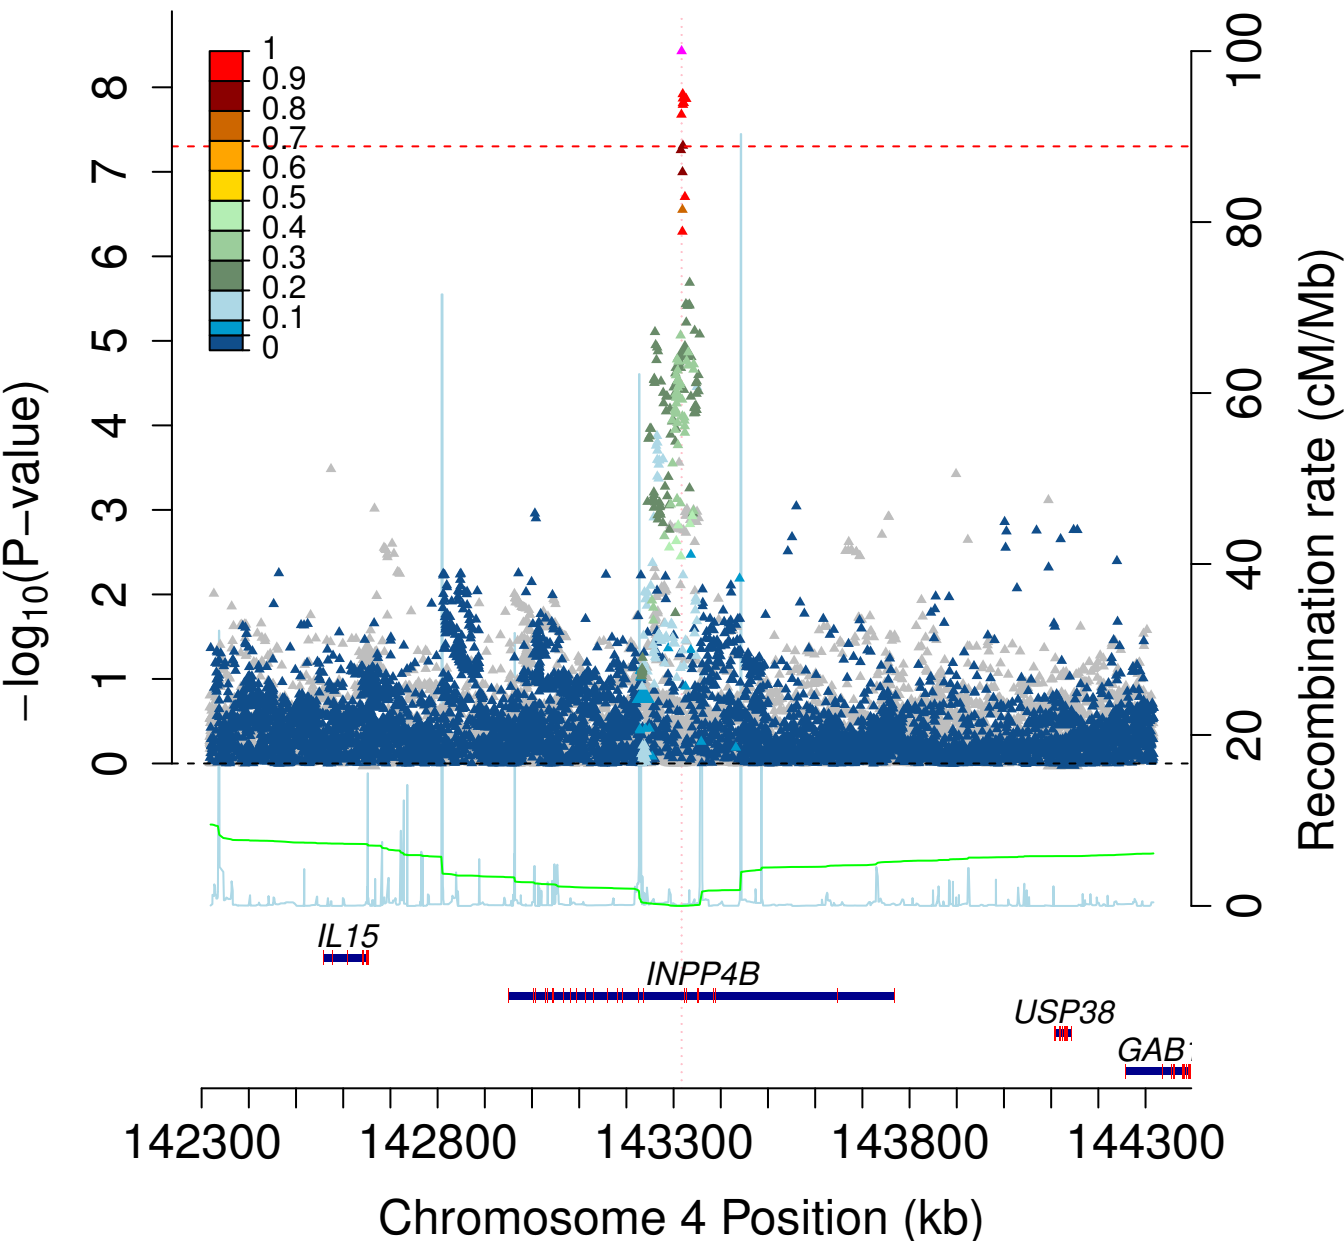

rs11727676 – HDL GG

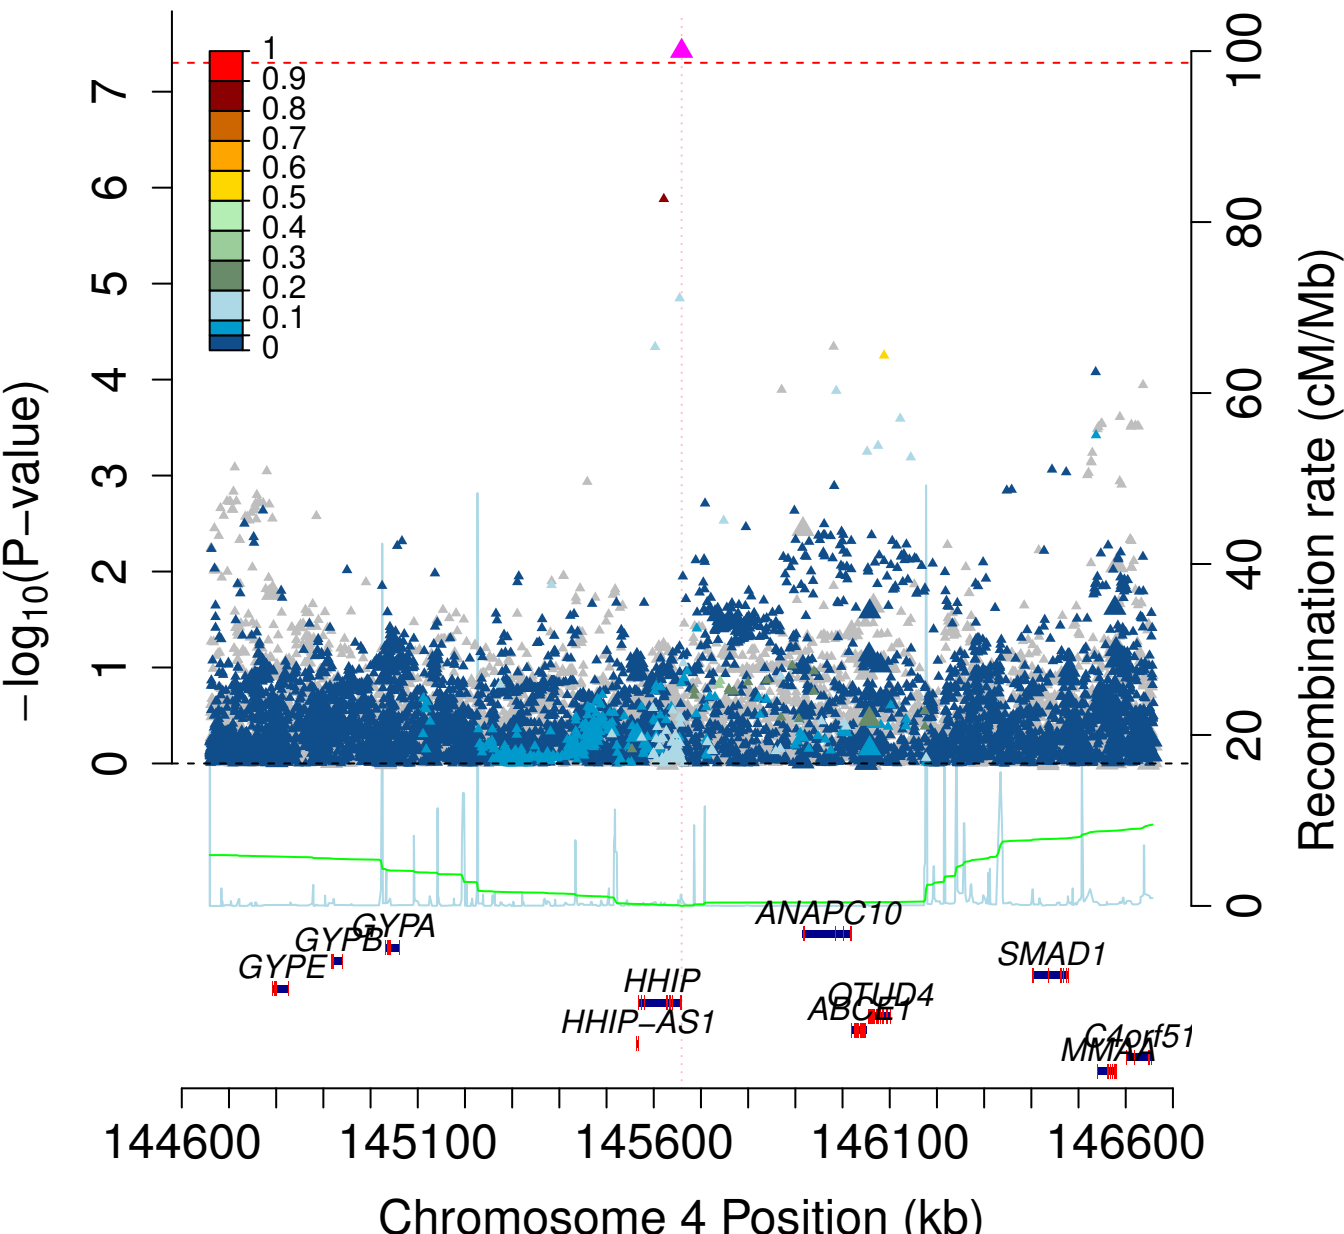

rs62362194 – HDL G

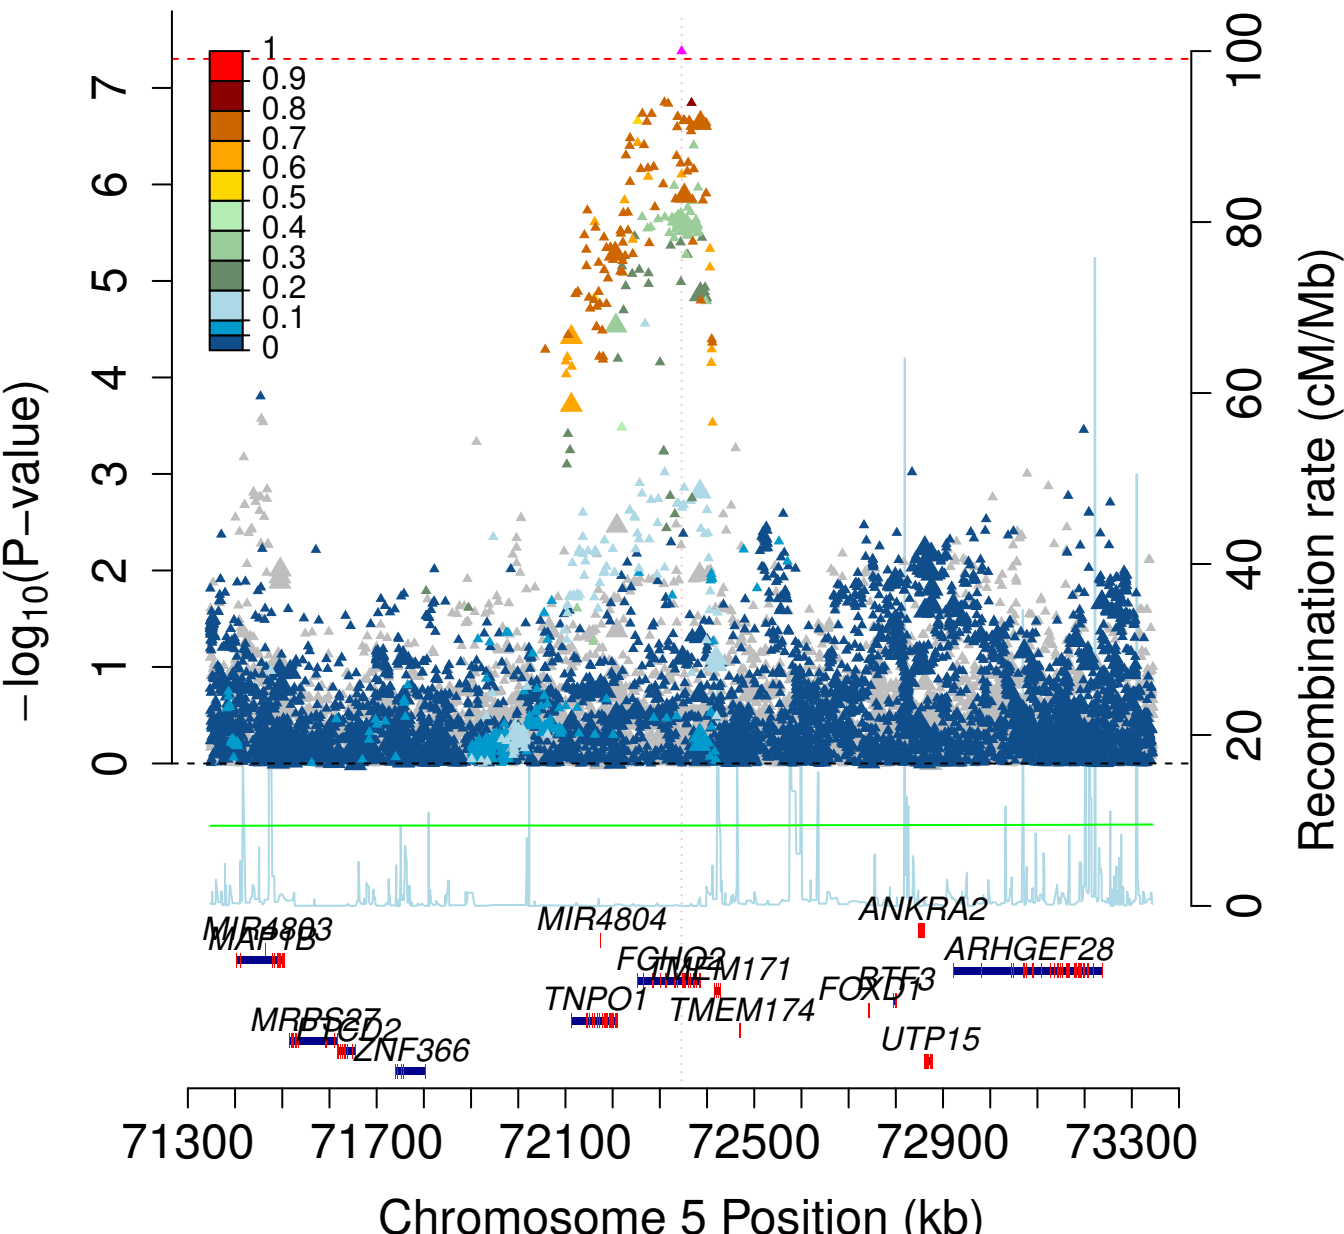

rs1045241 – TG GG

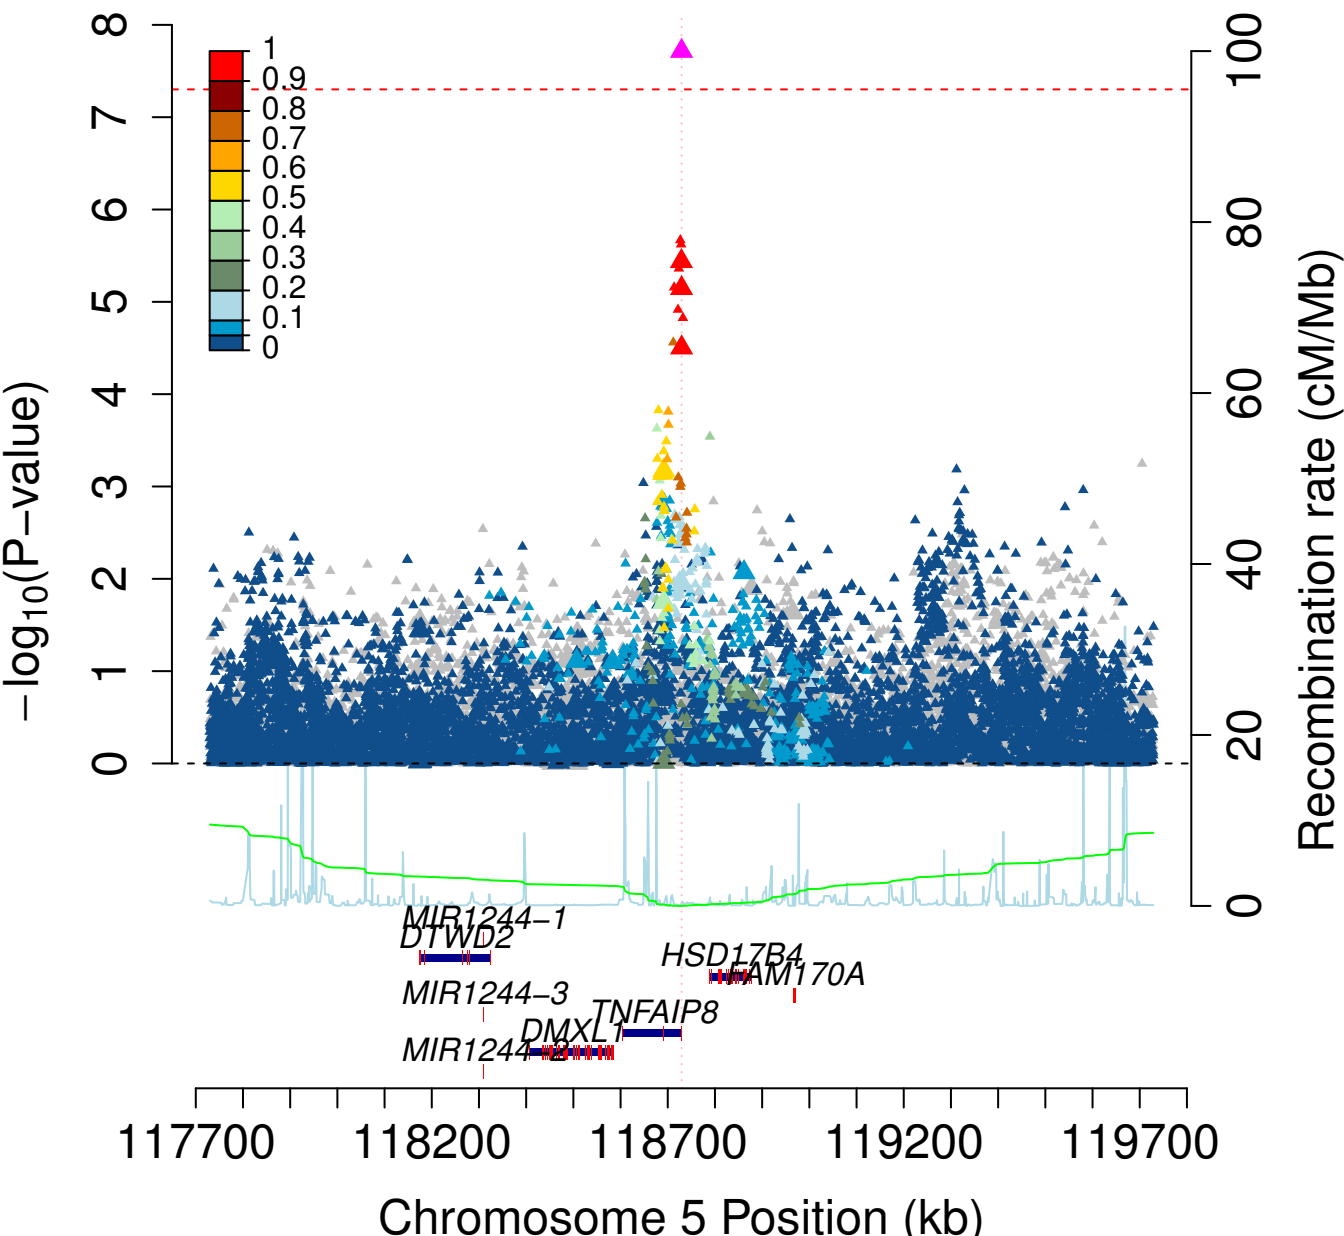



rs2522061 – LDL G

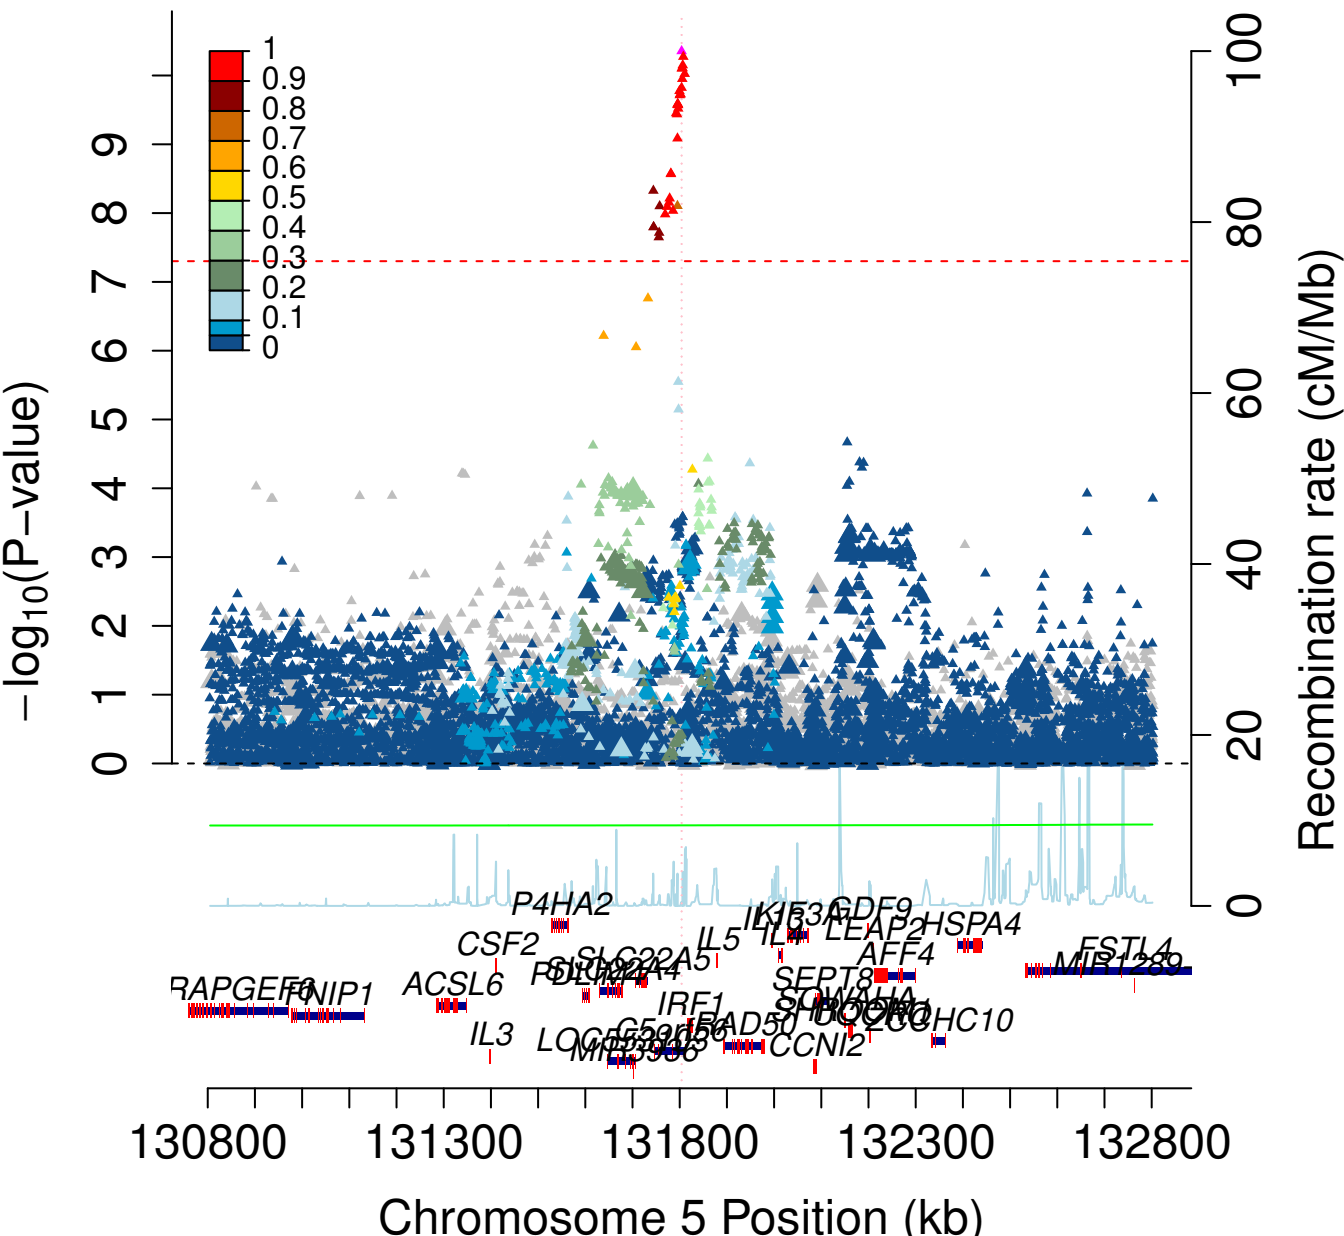

## rs4244029 – LDL GG

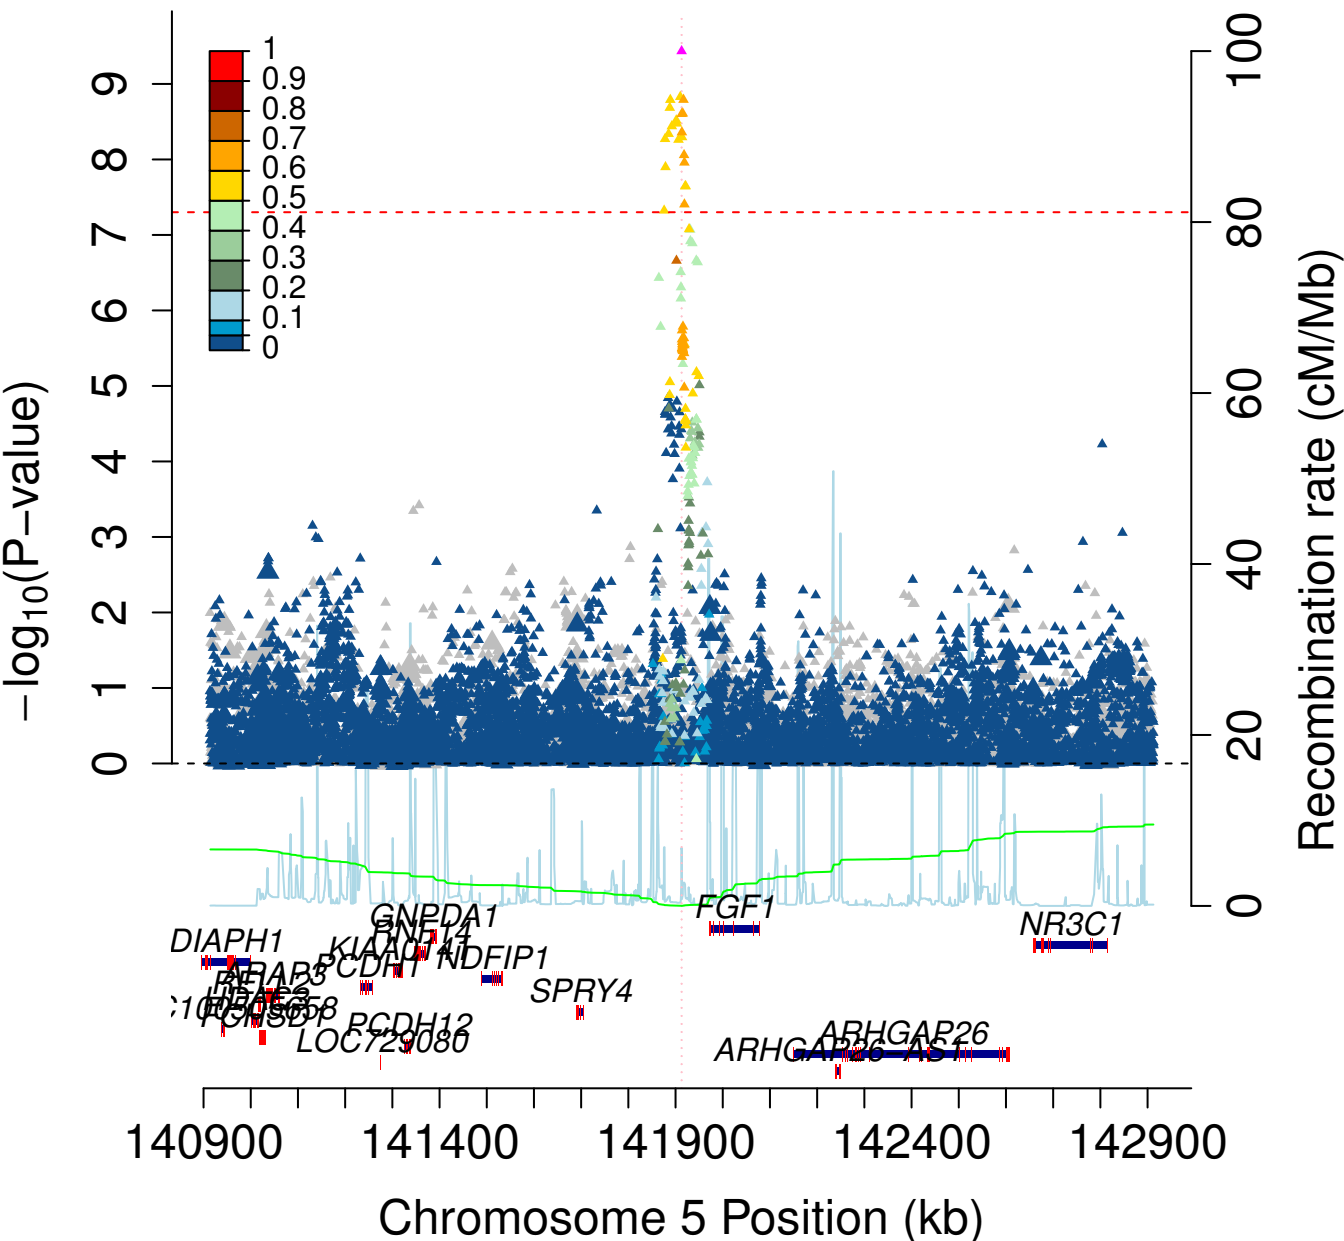

## rs1651274 – HDL G

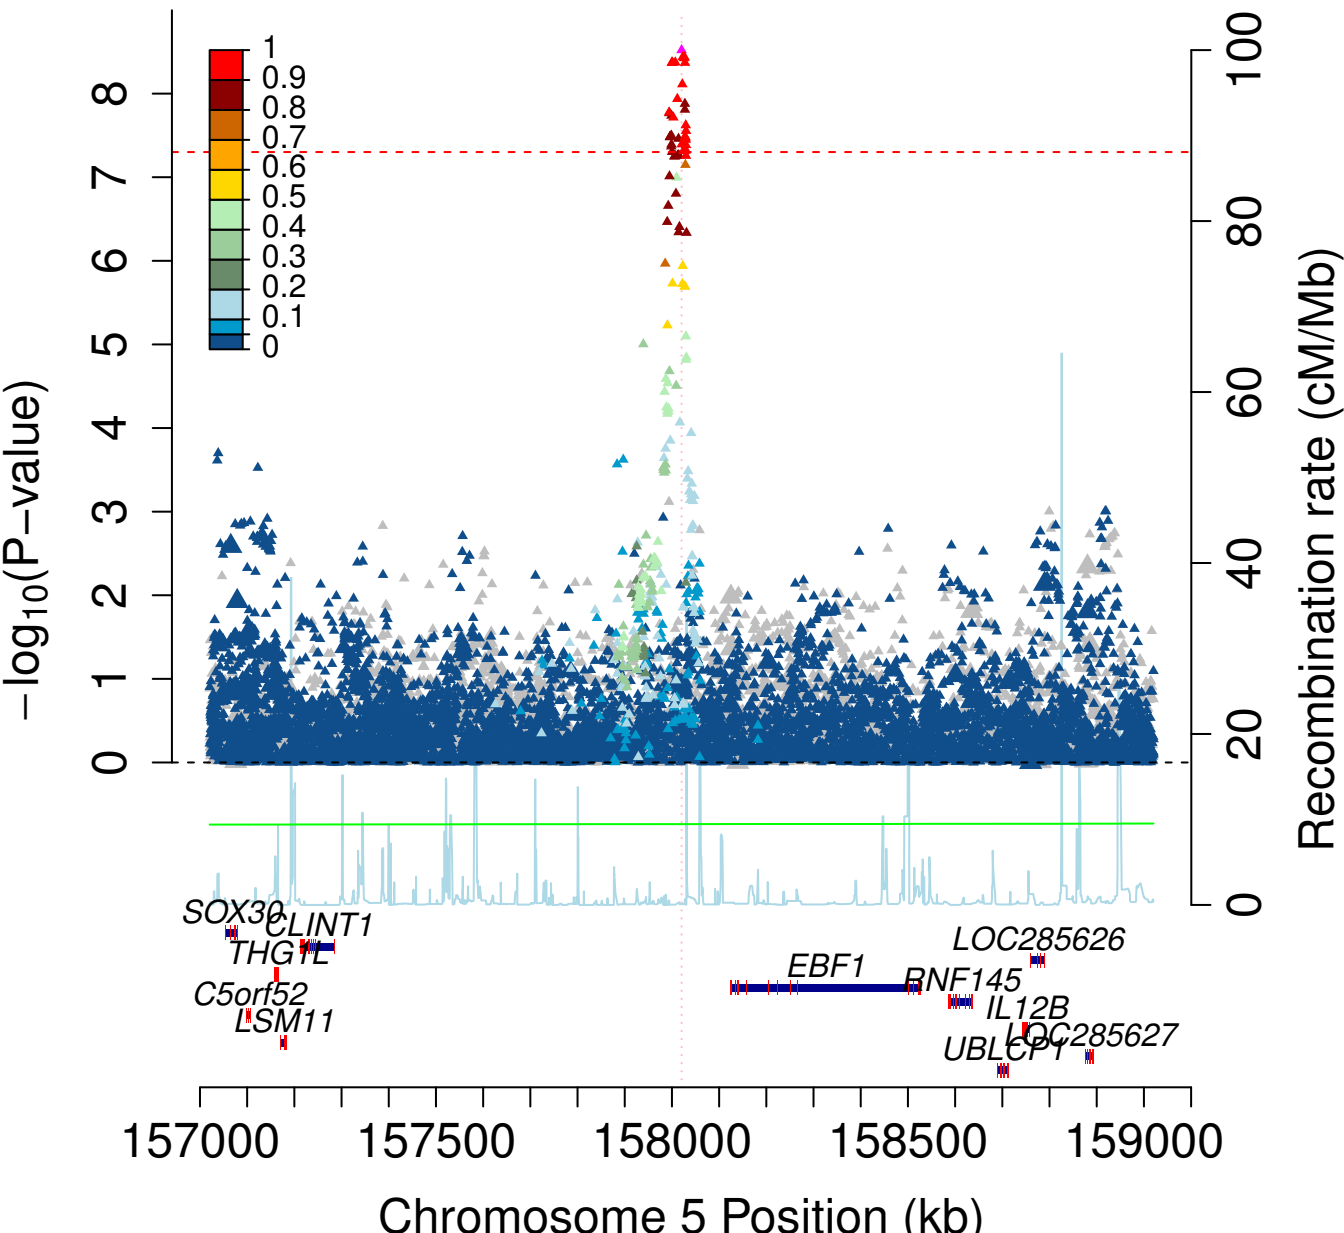

rs6456350 – TC GG

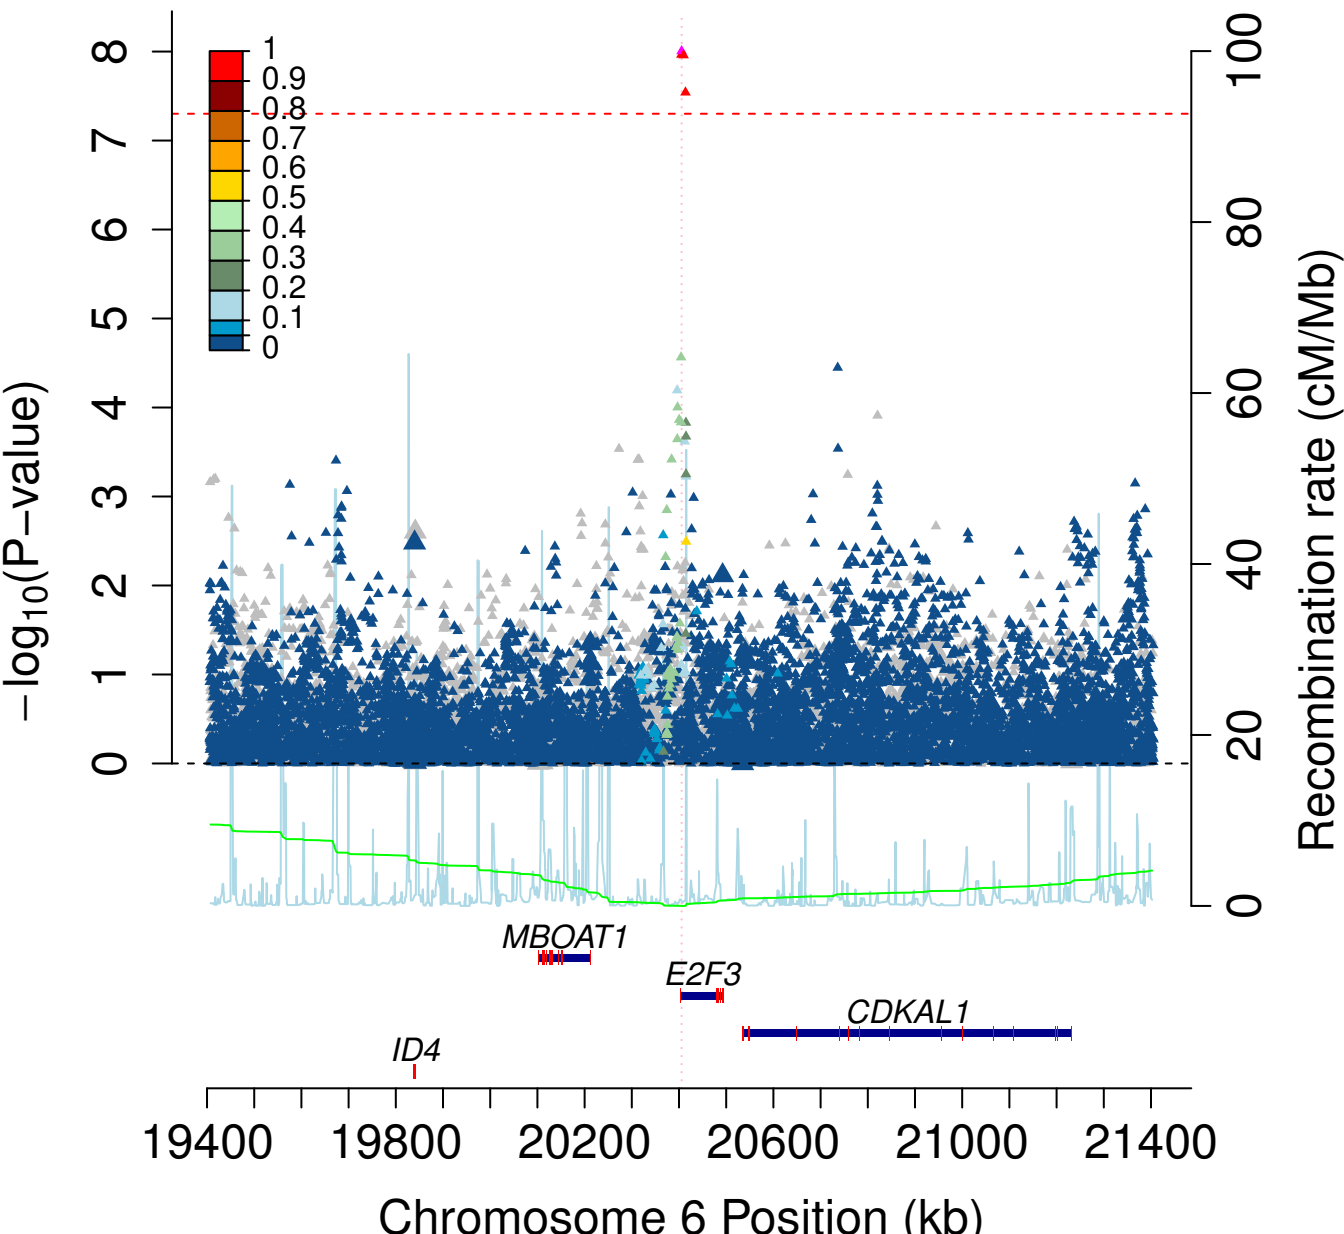



## rs12529923 – HDL G

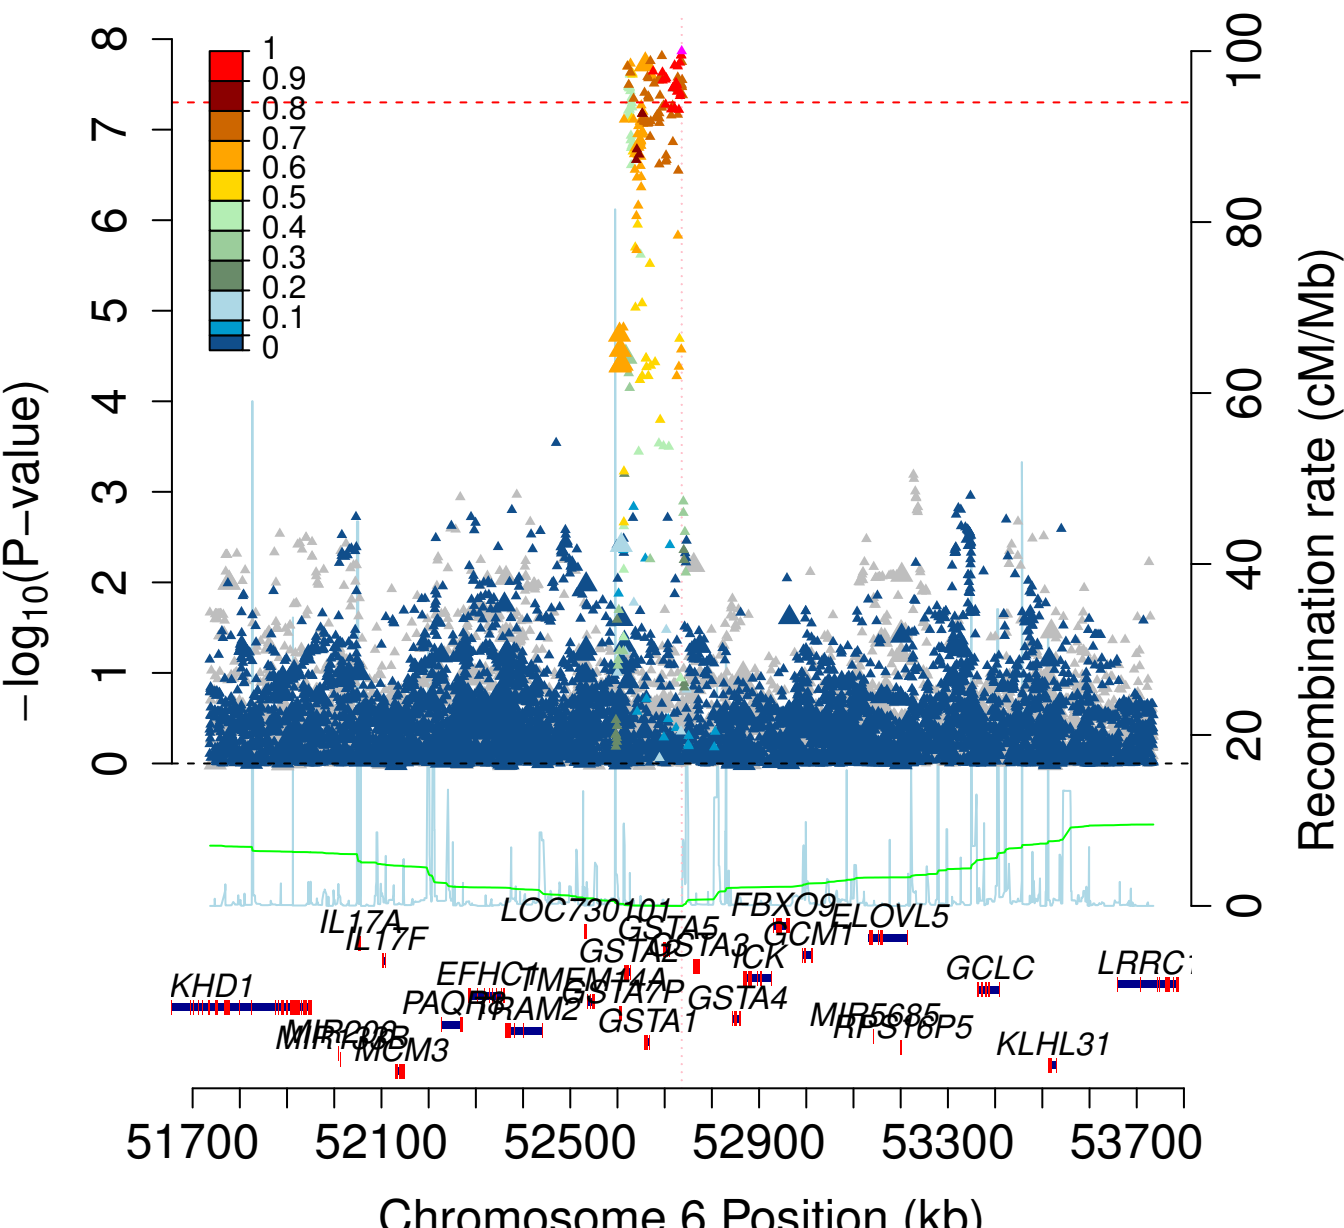

## rs17789218 – LDL GG

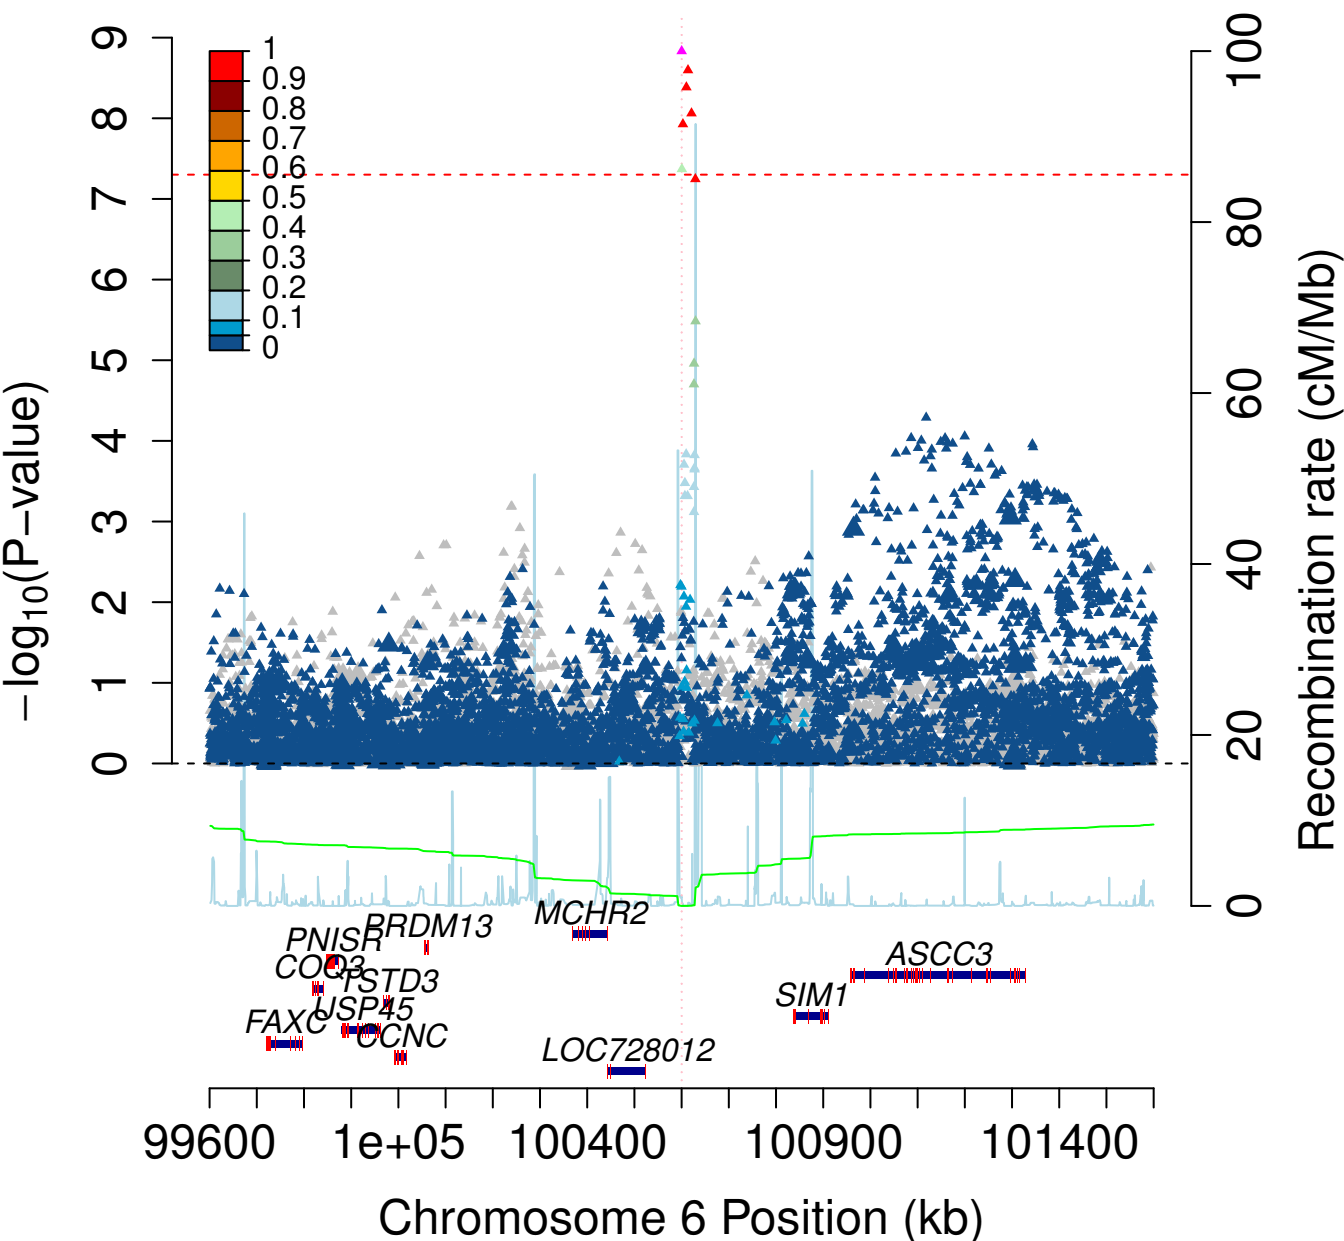

rs181937009 – TG G

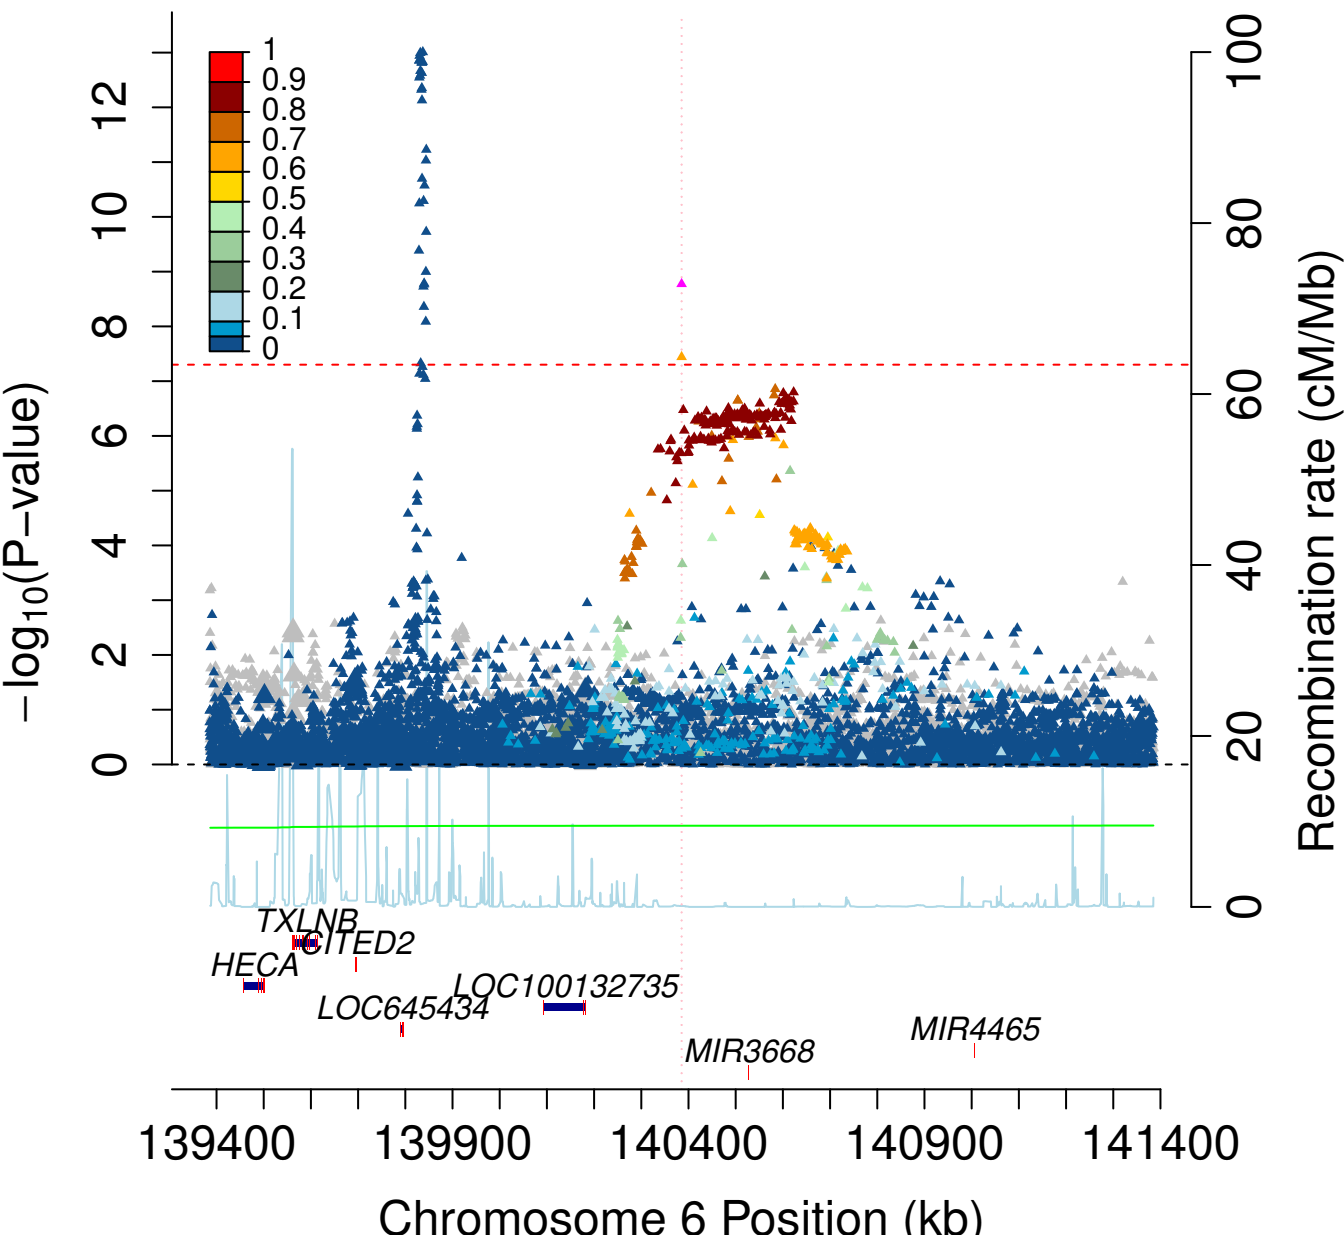



rs9371220 – TC GG

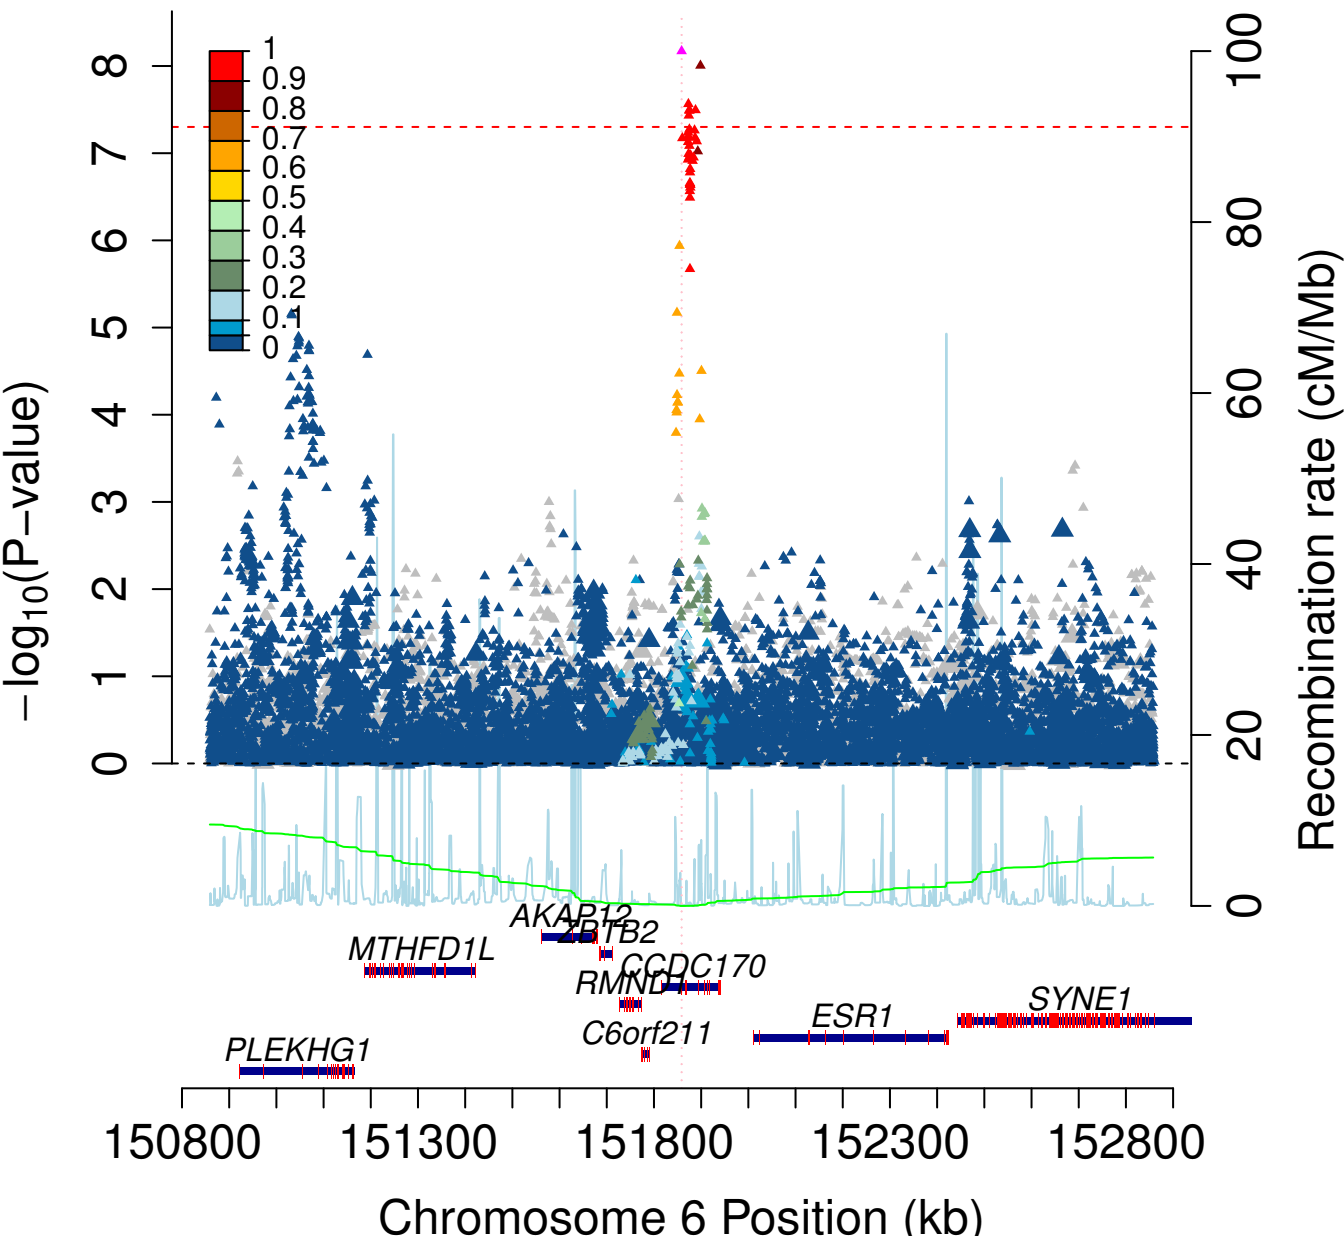

rs1281955 – HDL G

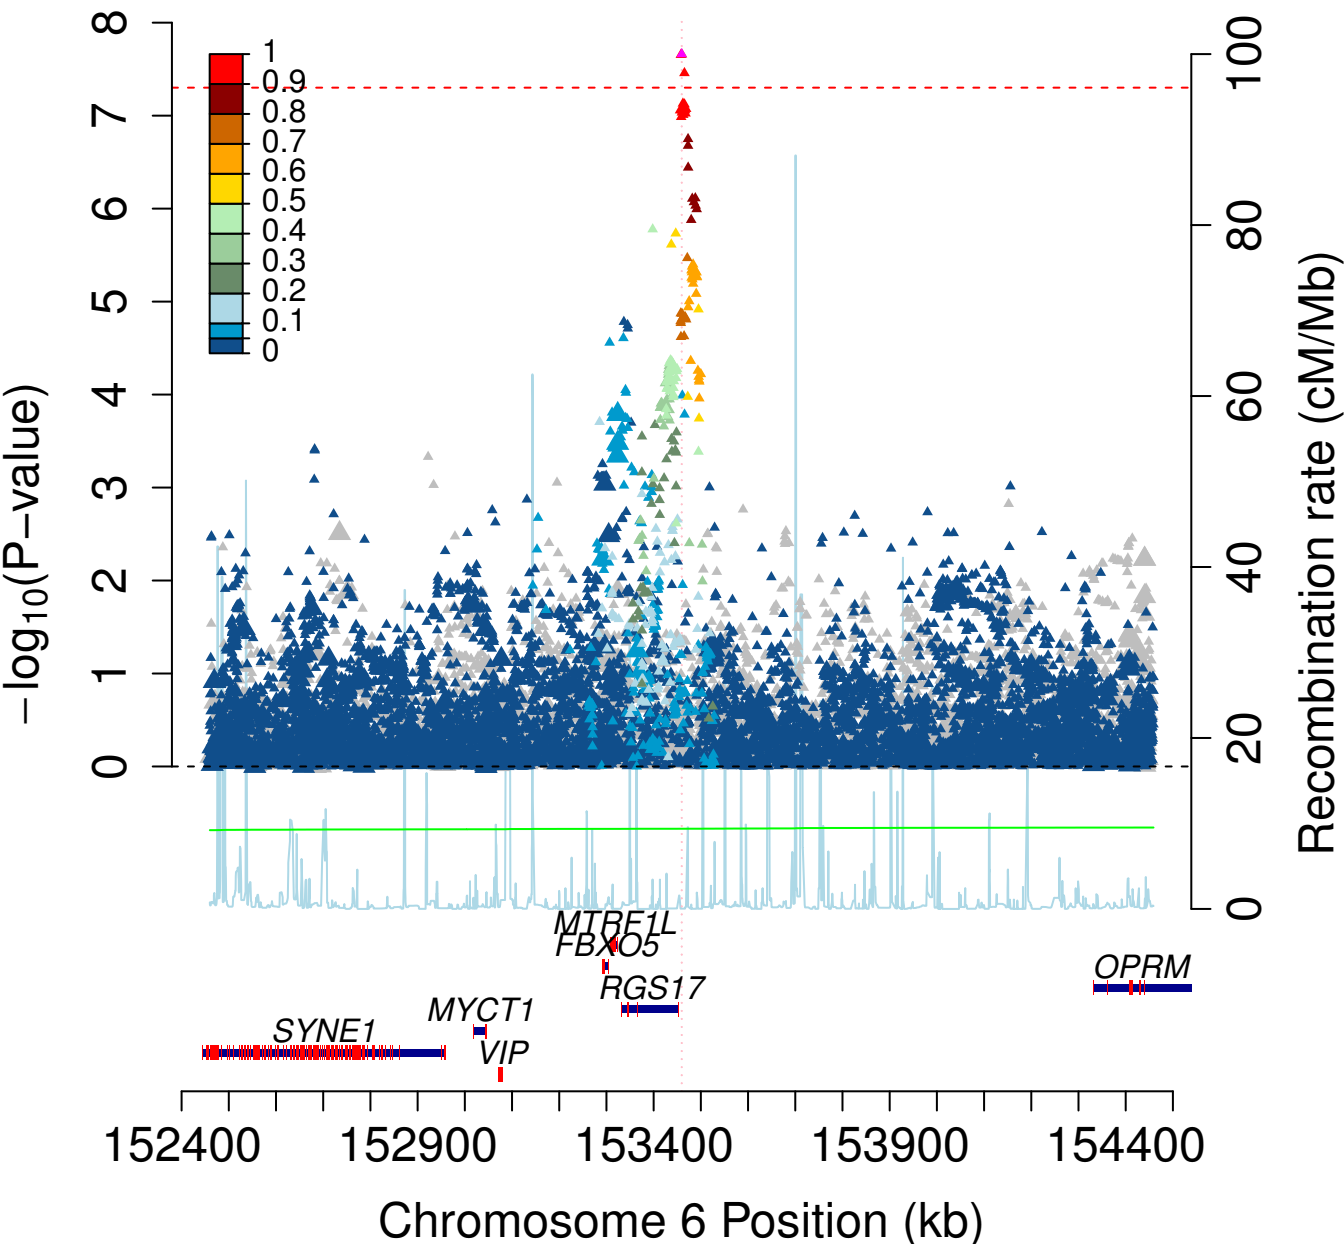

rs2534596 – HDL G

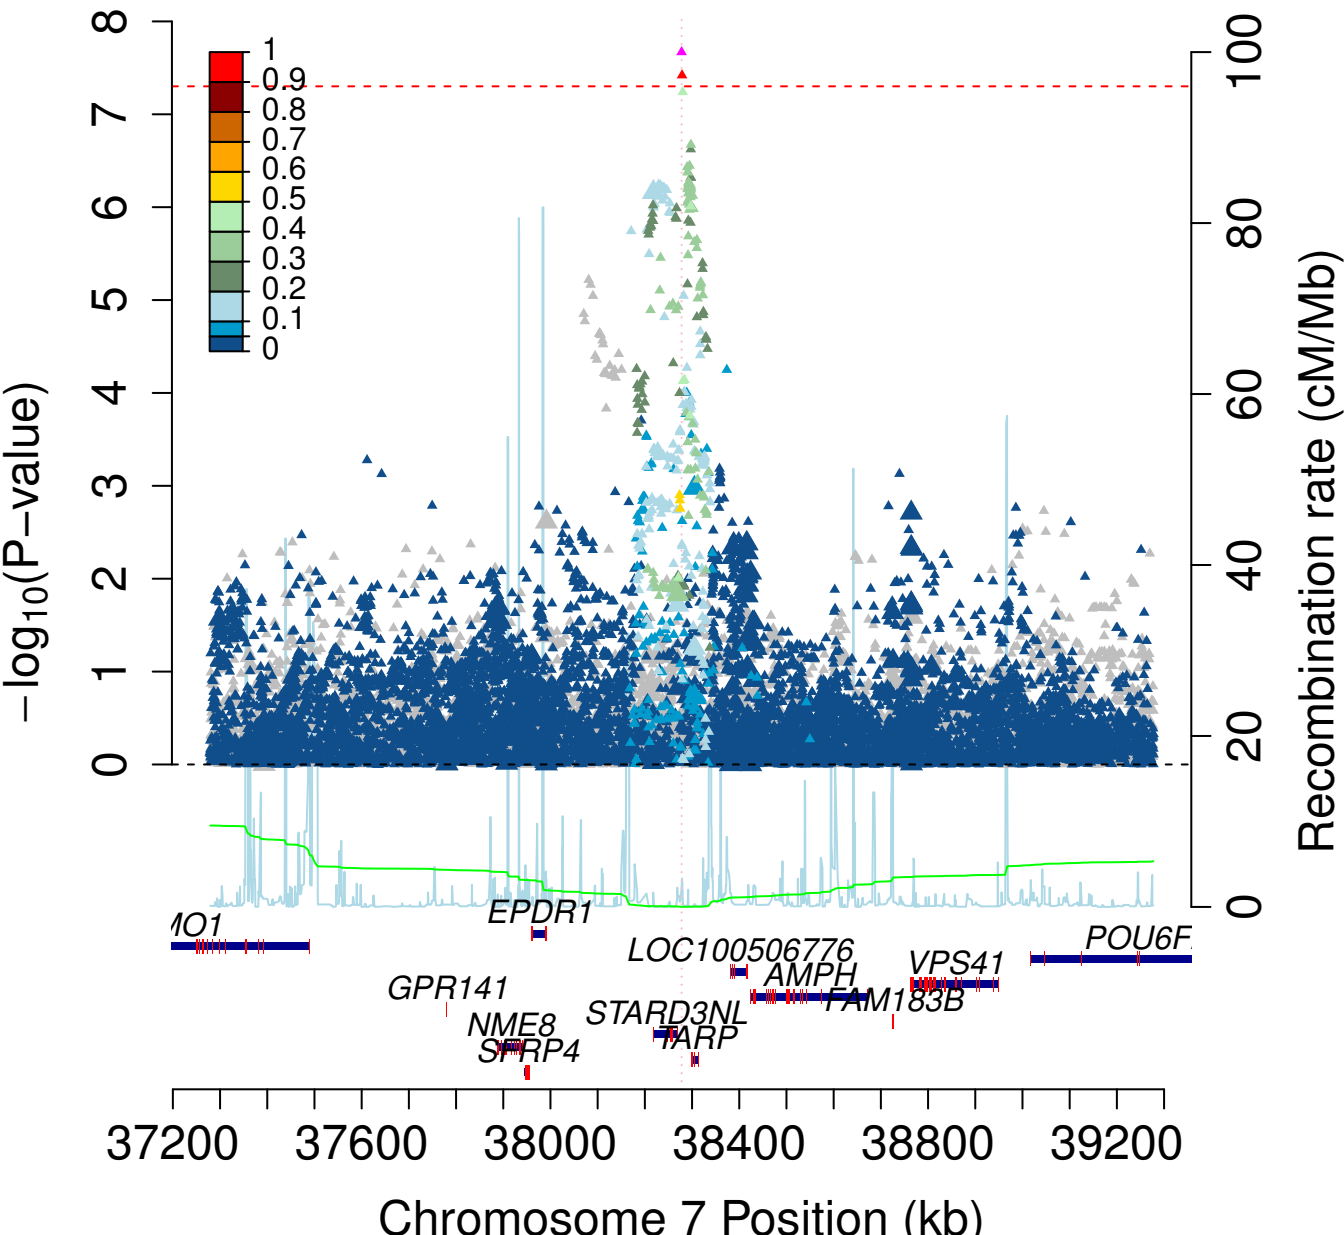

rs2299247 – TG G

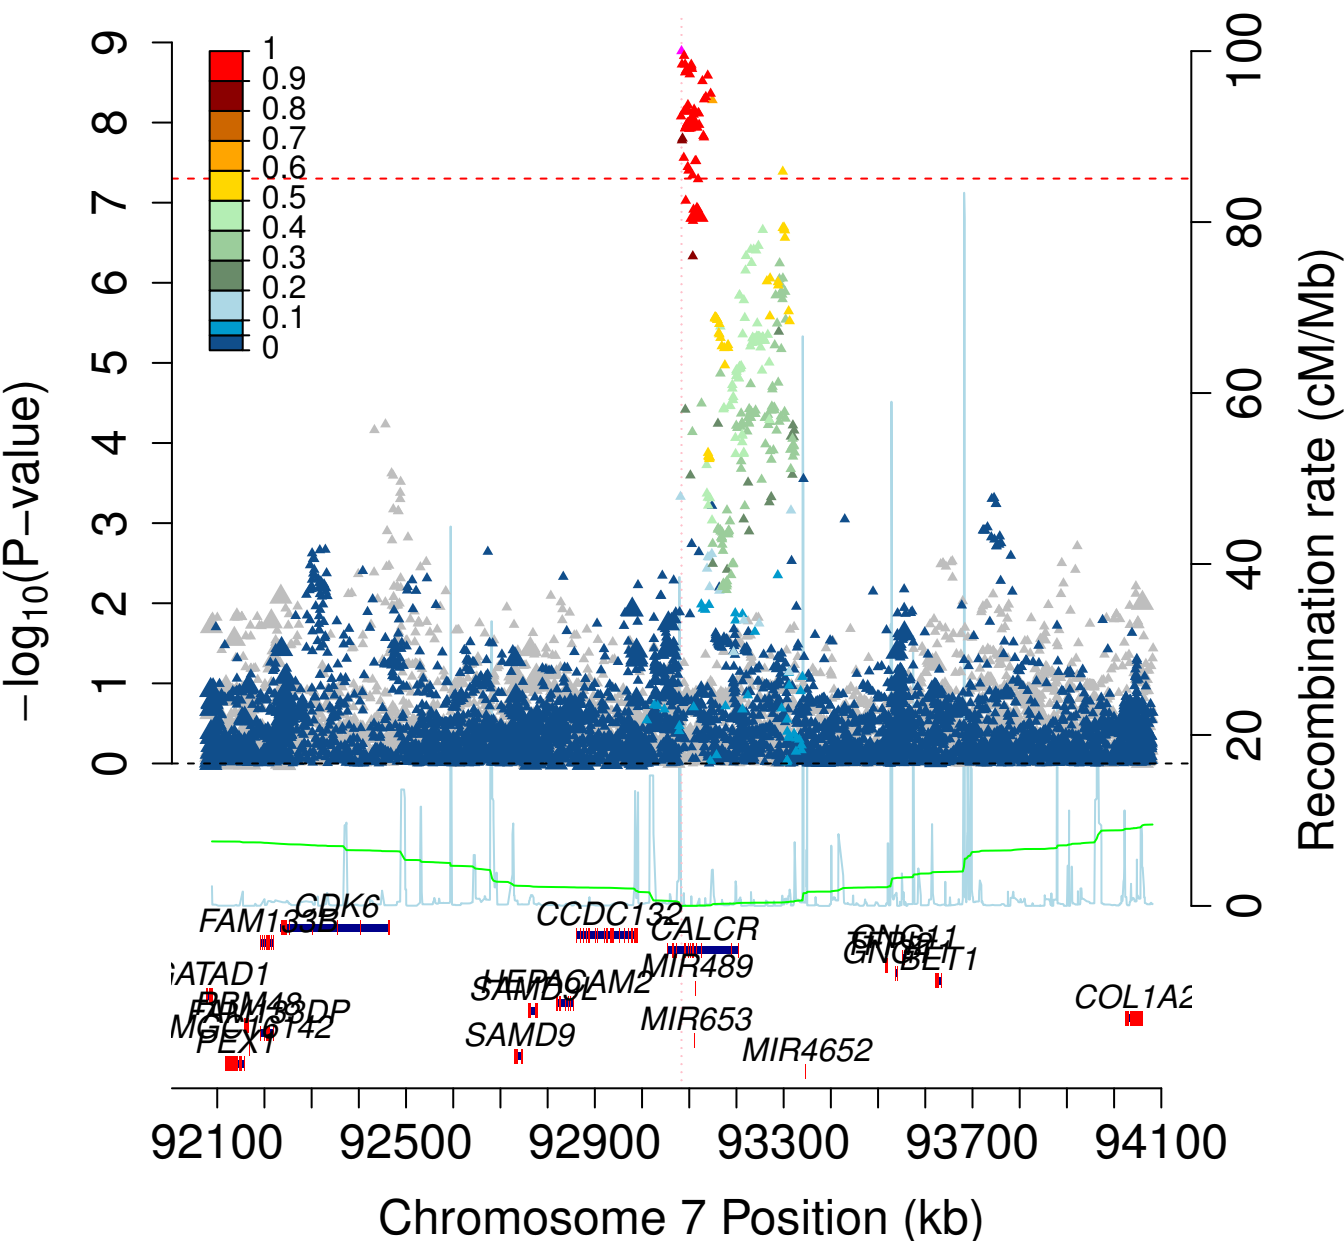





rs2958557 – TG G

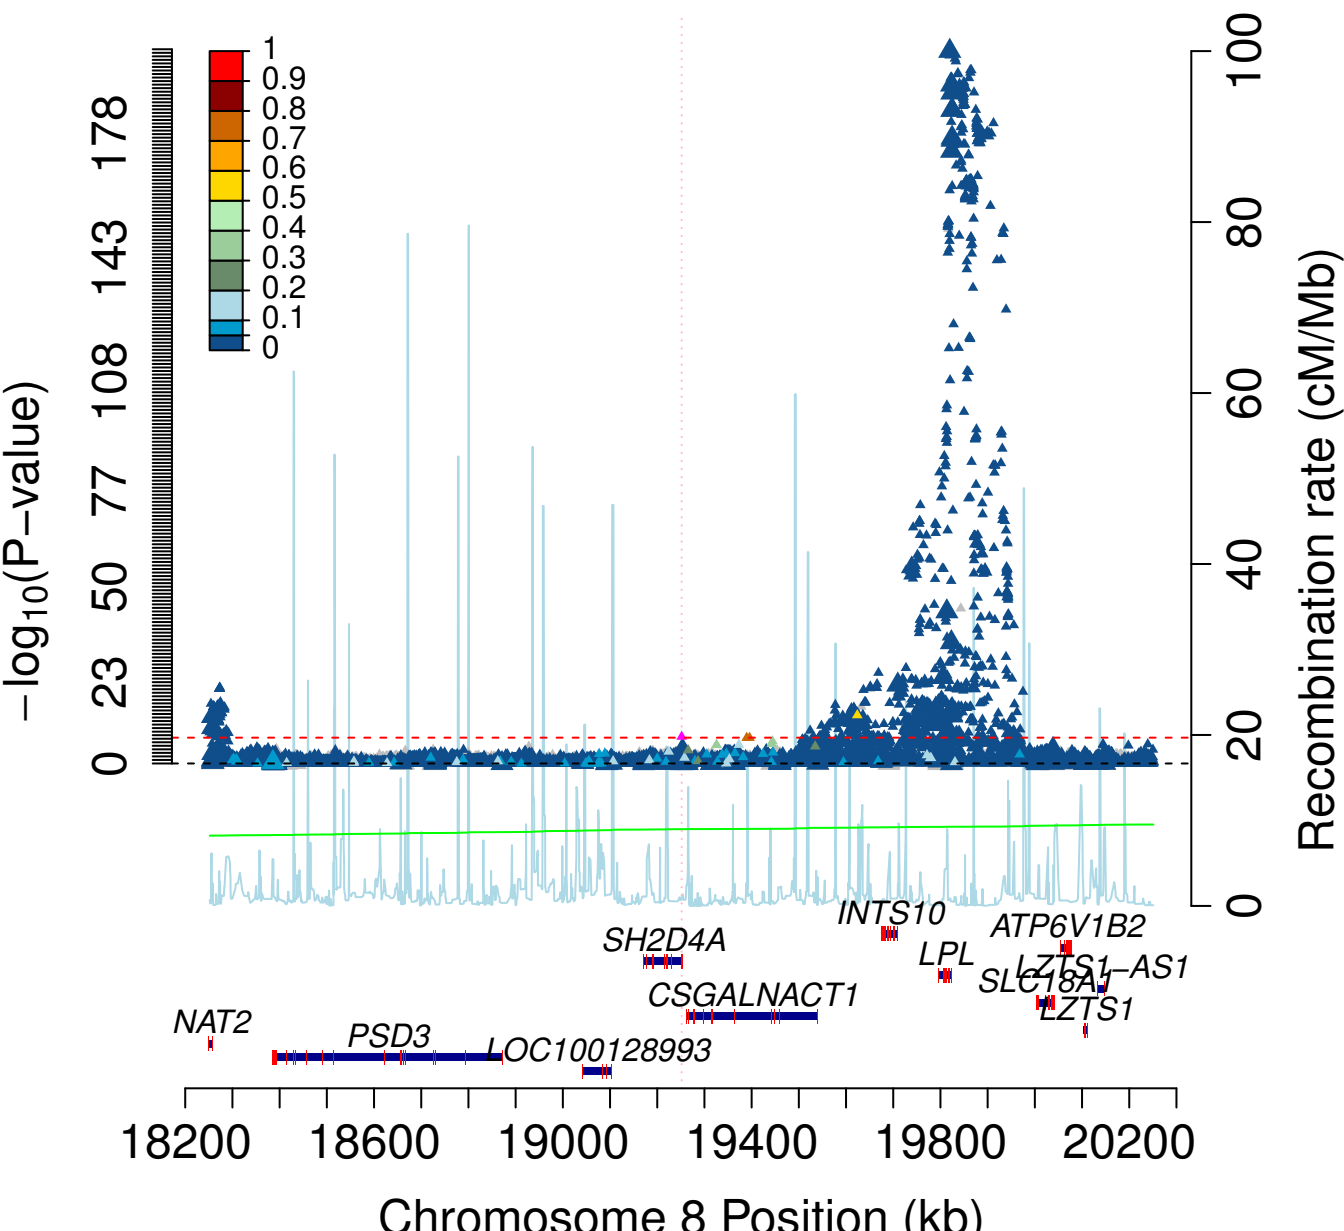

## rs10091038 – HDL GG

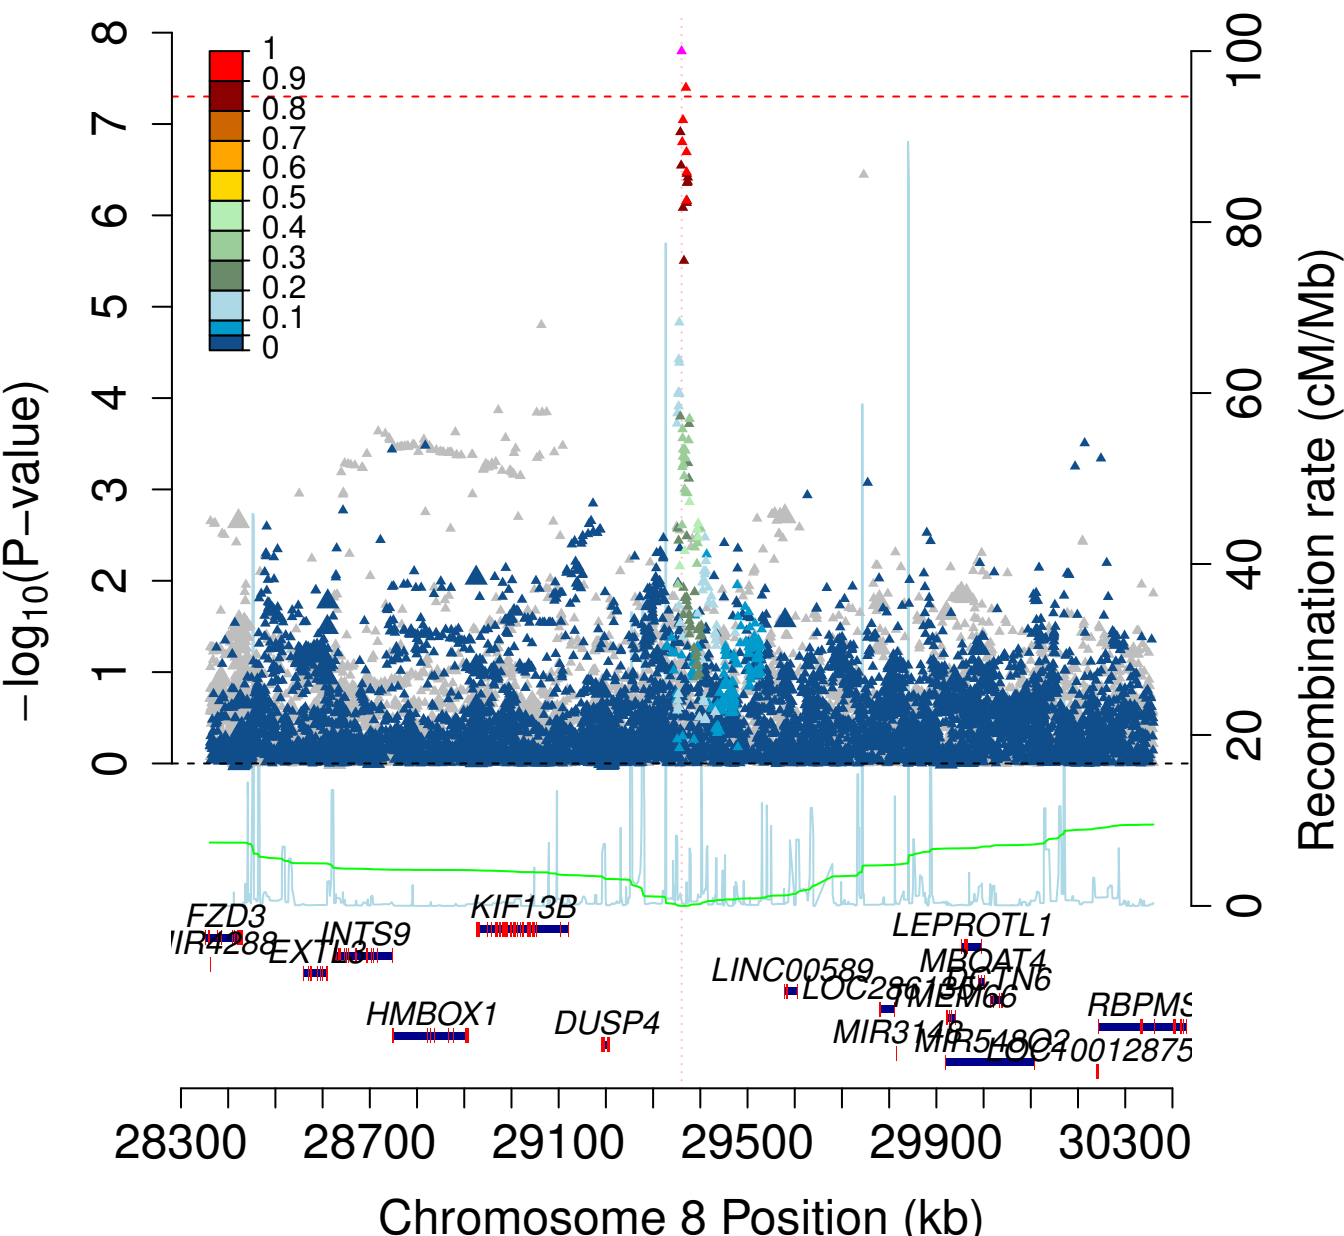



rs10504474 – HDL GG

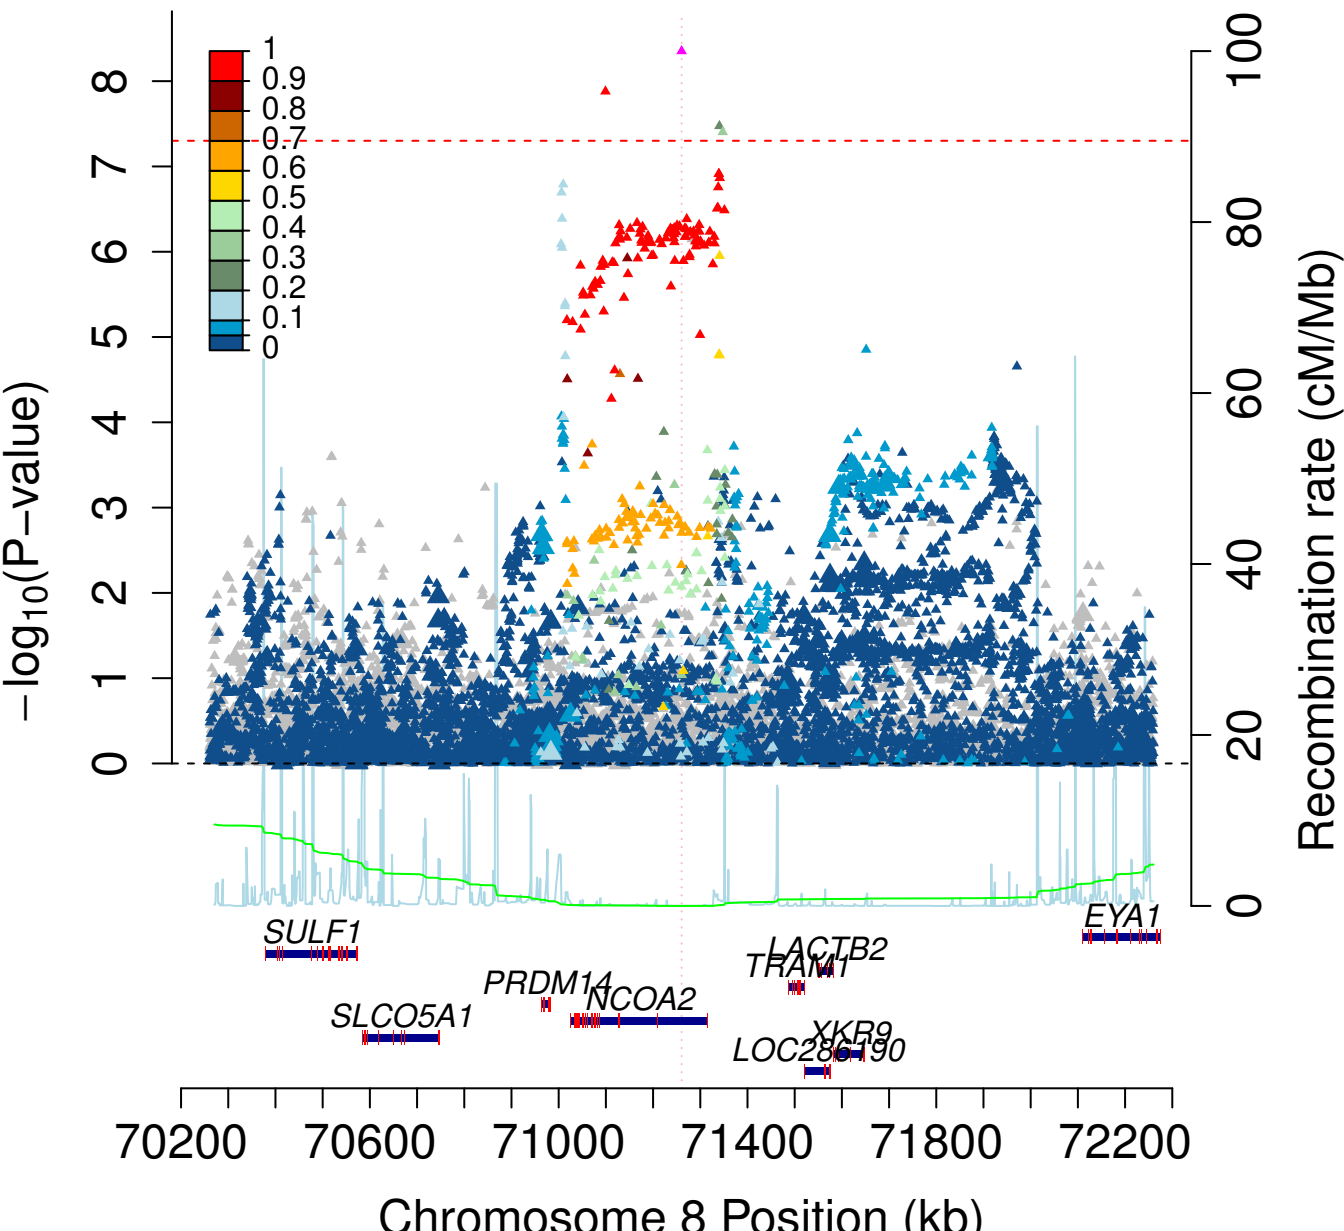



## rs13248499 – HDL G

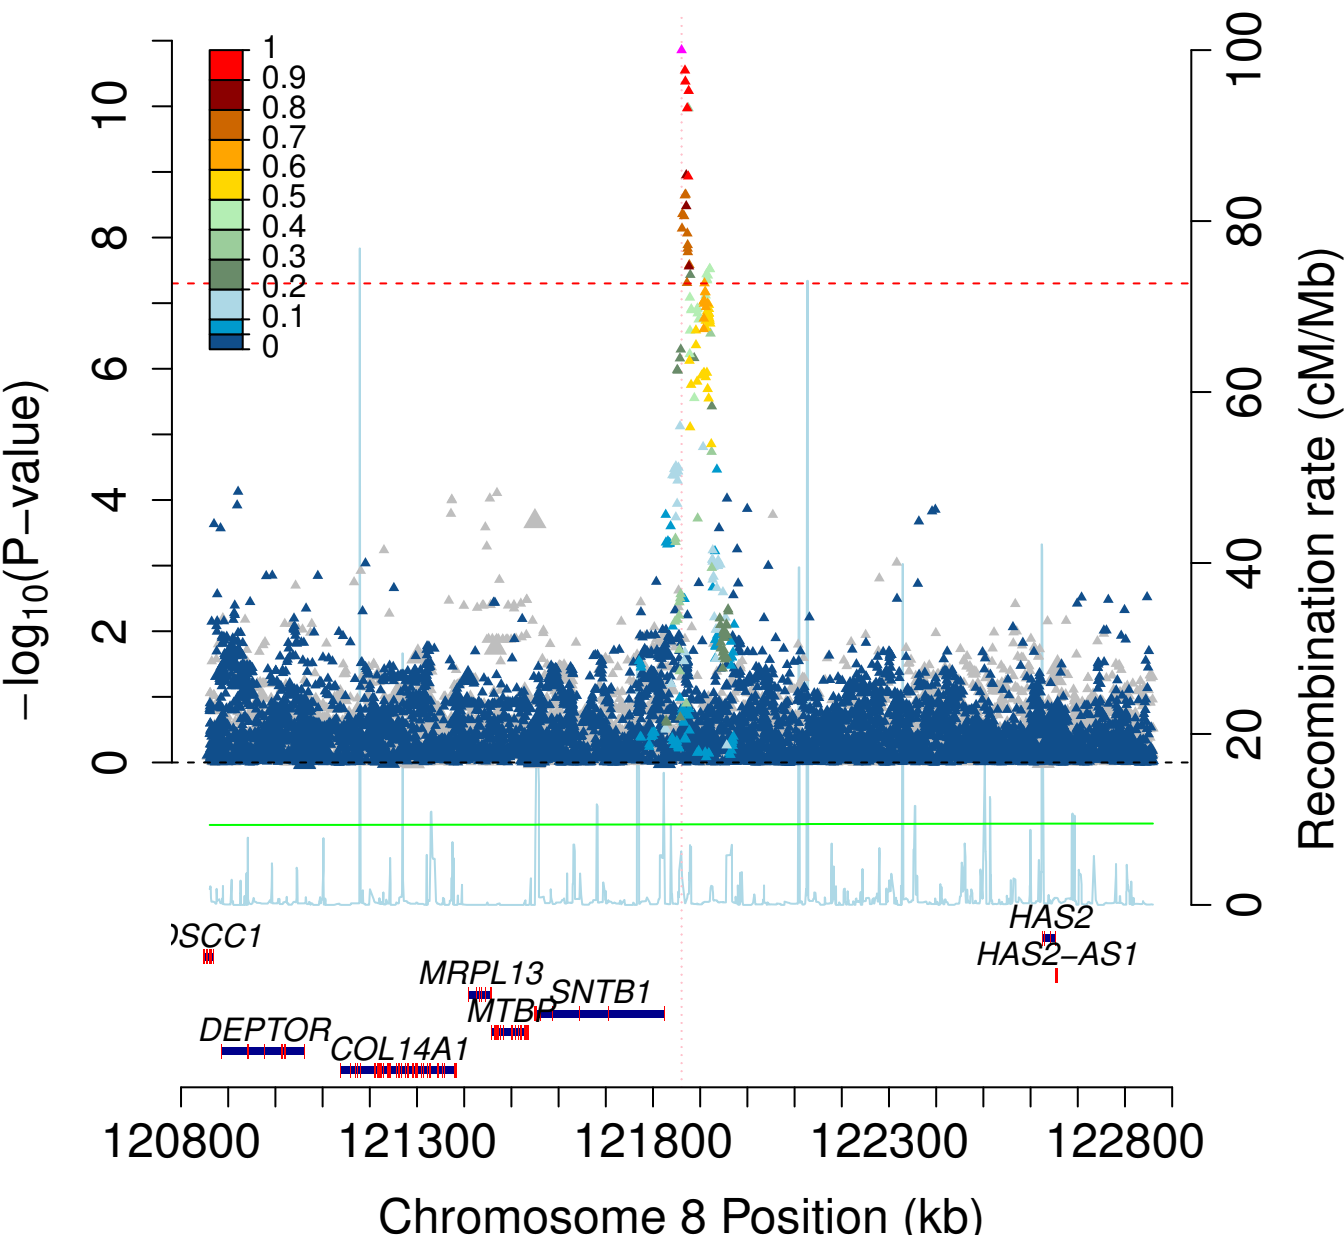



rs74664507 – TG GG

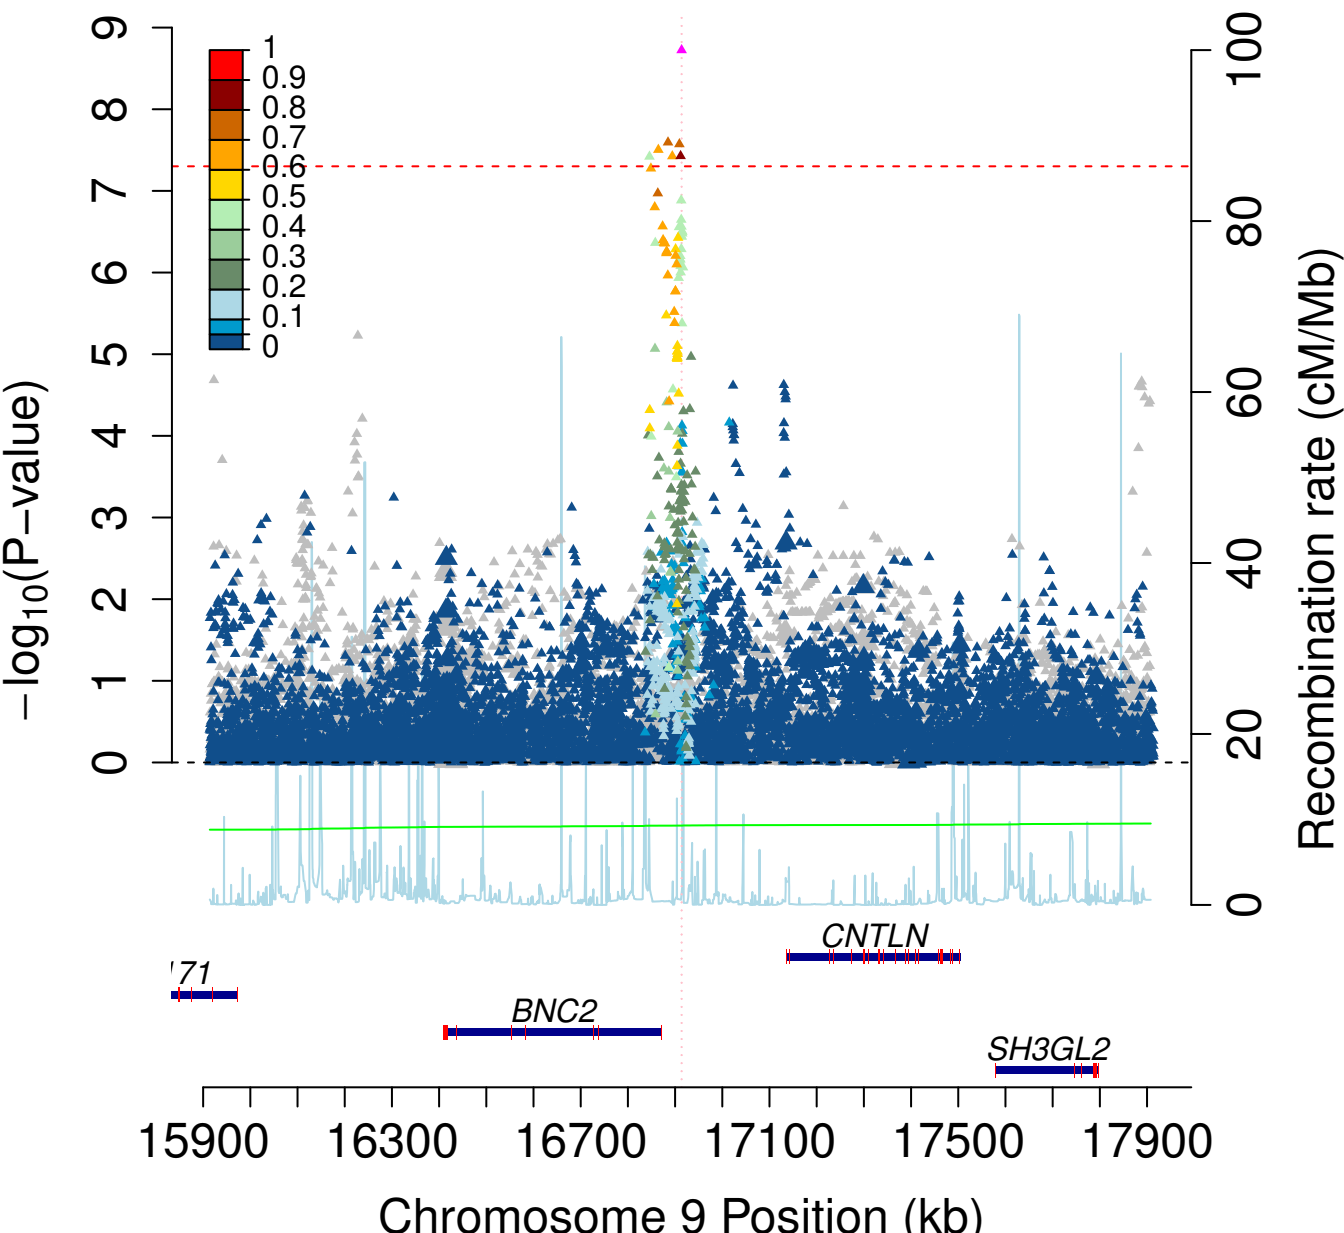

## chr9:19368272:D - TC G

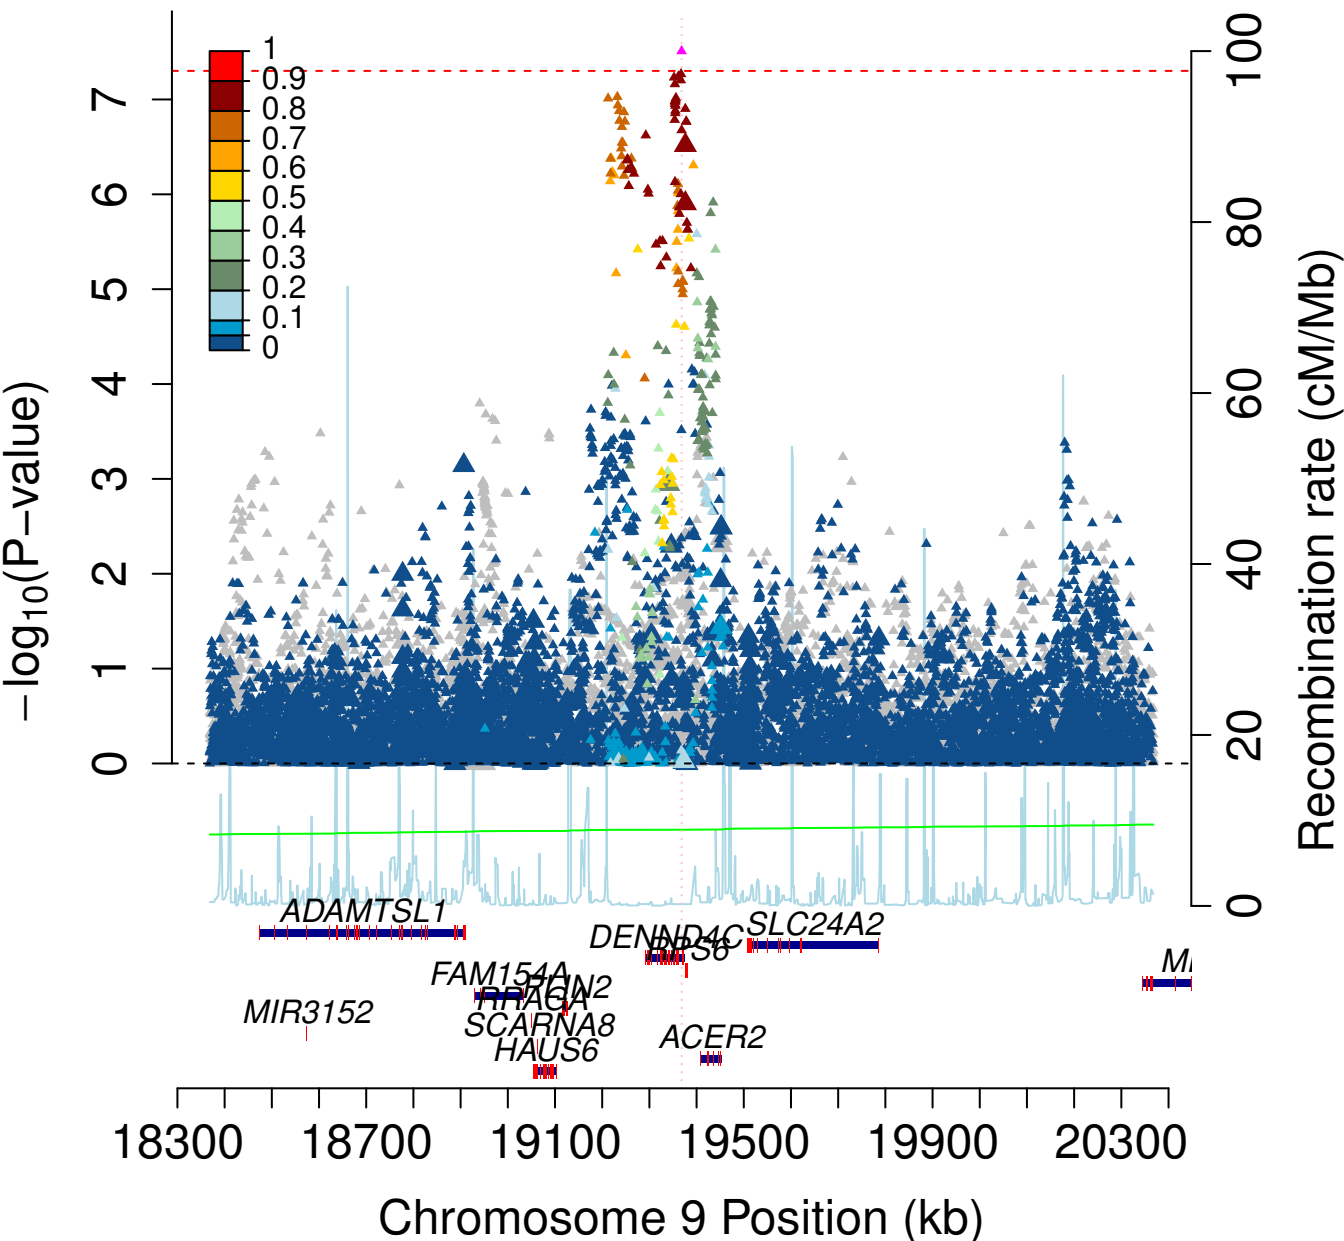

rs74551598 – TC G

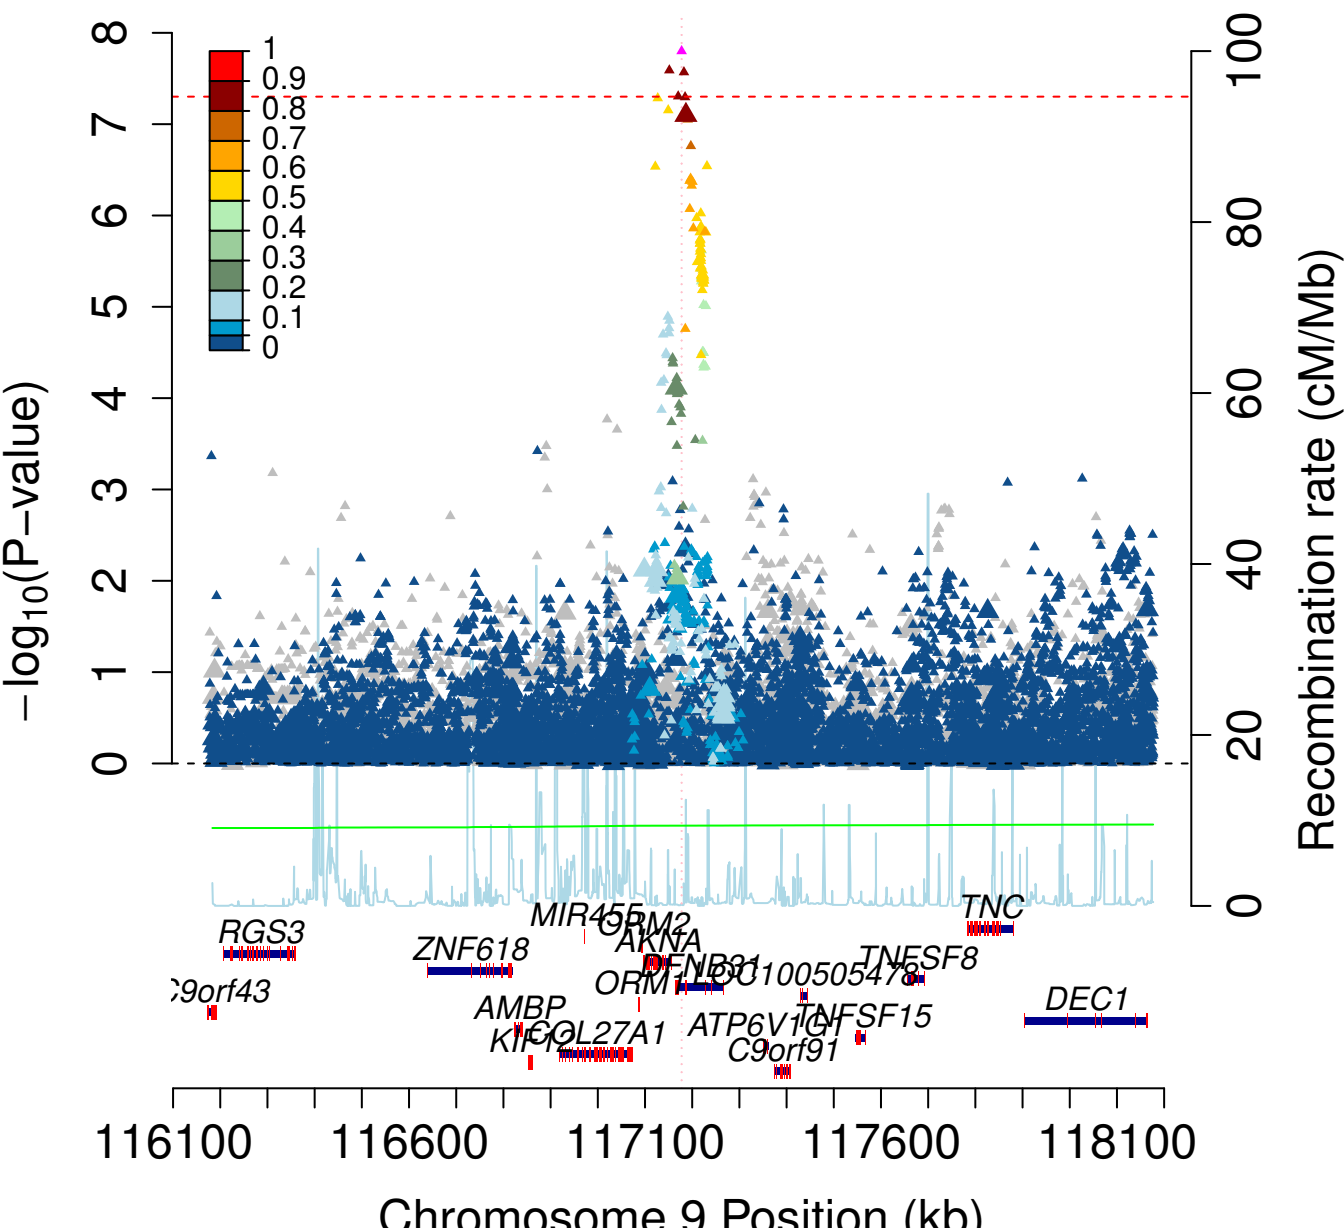

## rs57176252 – LDL G

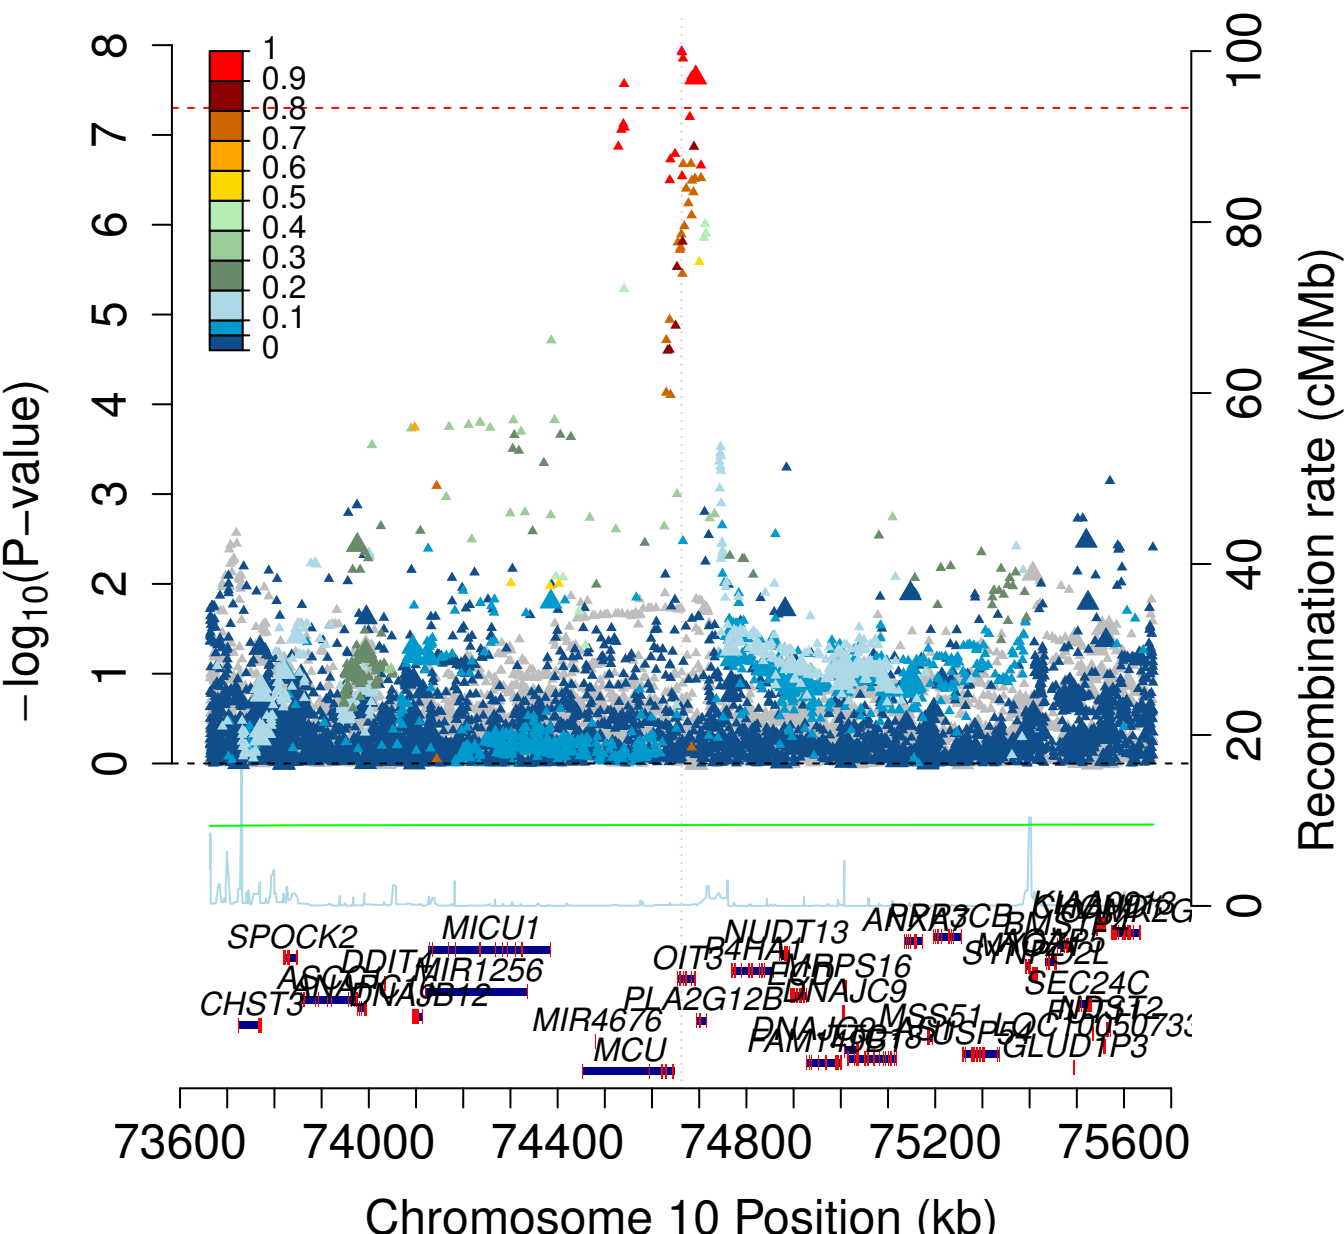



rs12784396 – TC GG

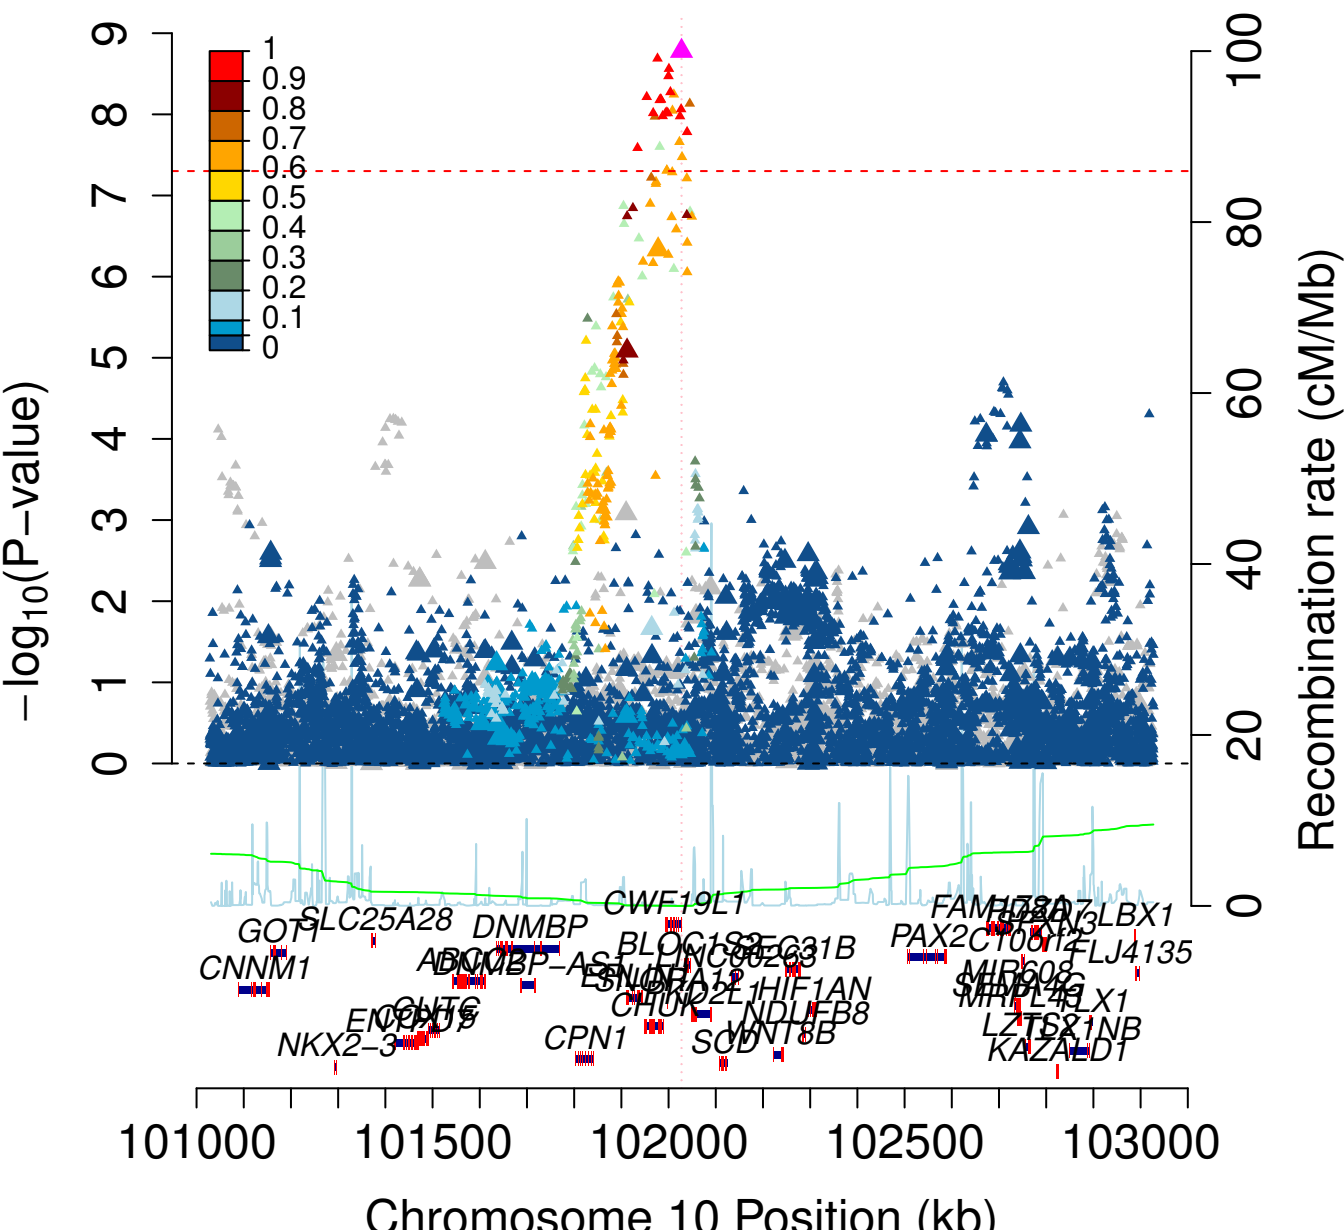

## rs4619105 – HDL GG

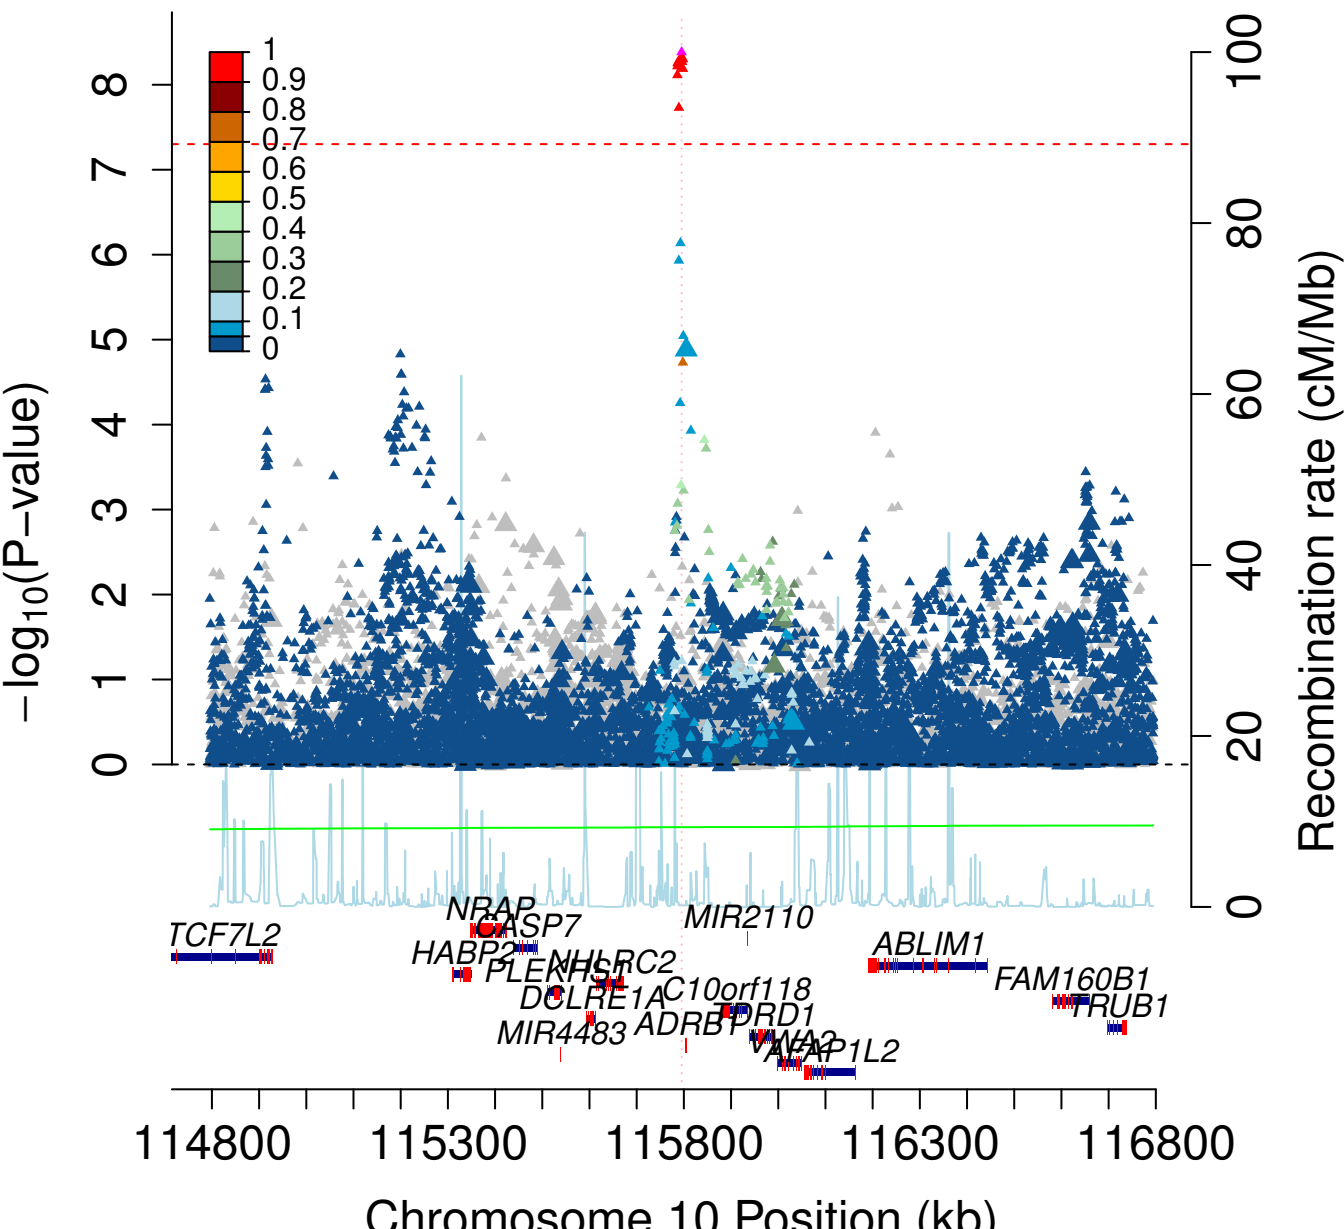

rs7079858 – HDL G

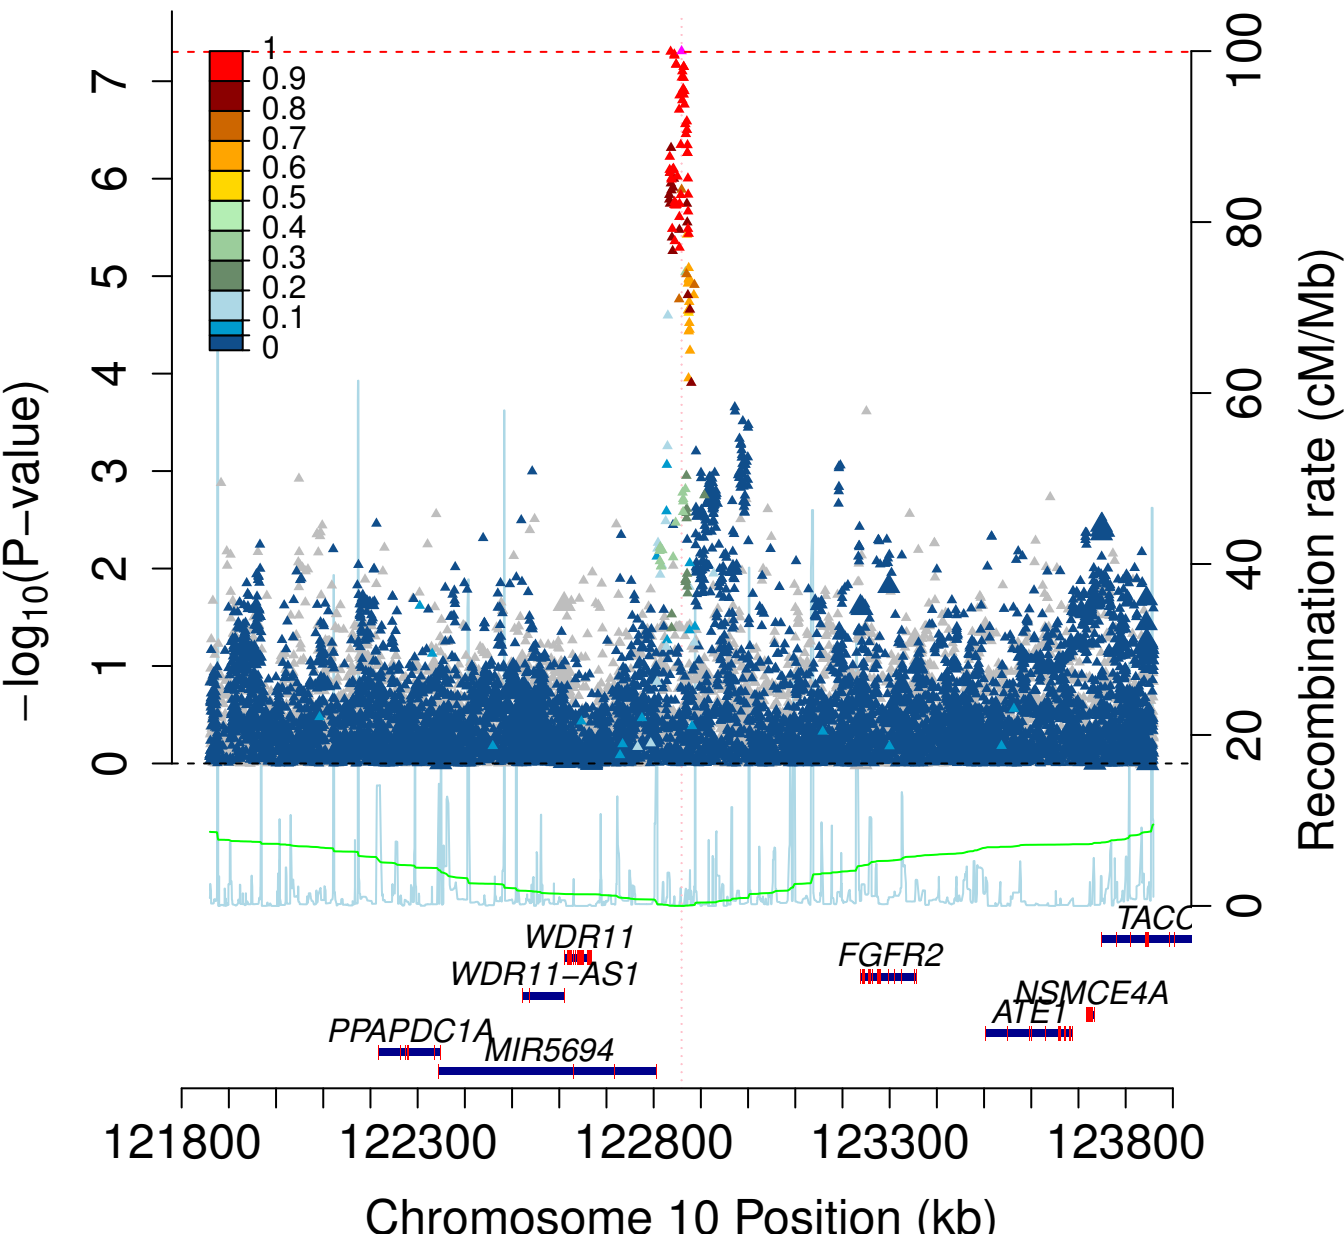





## rs11601507 – LDL G

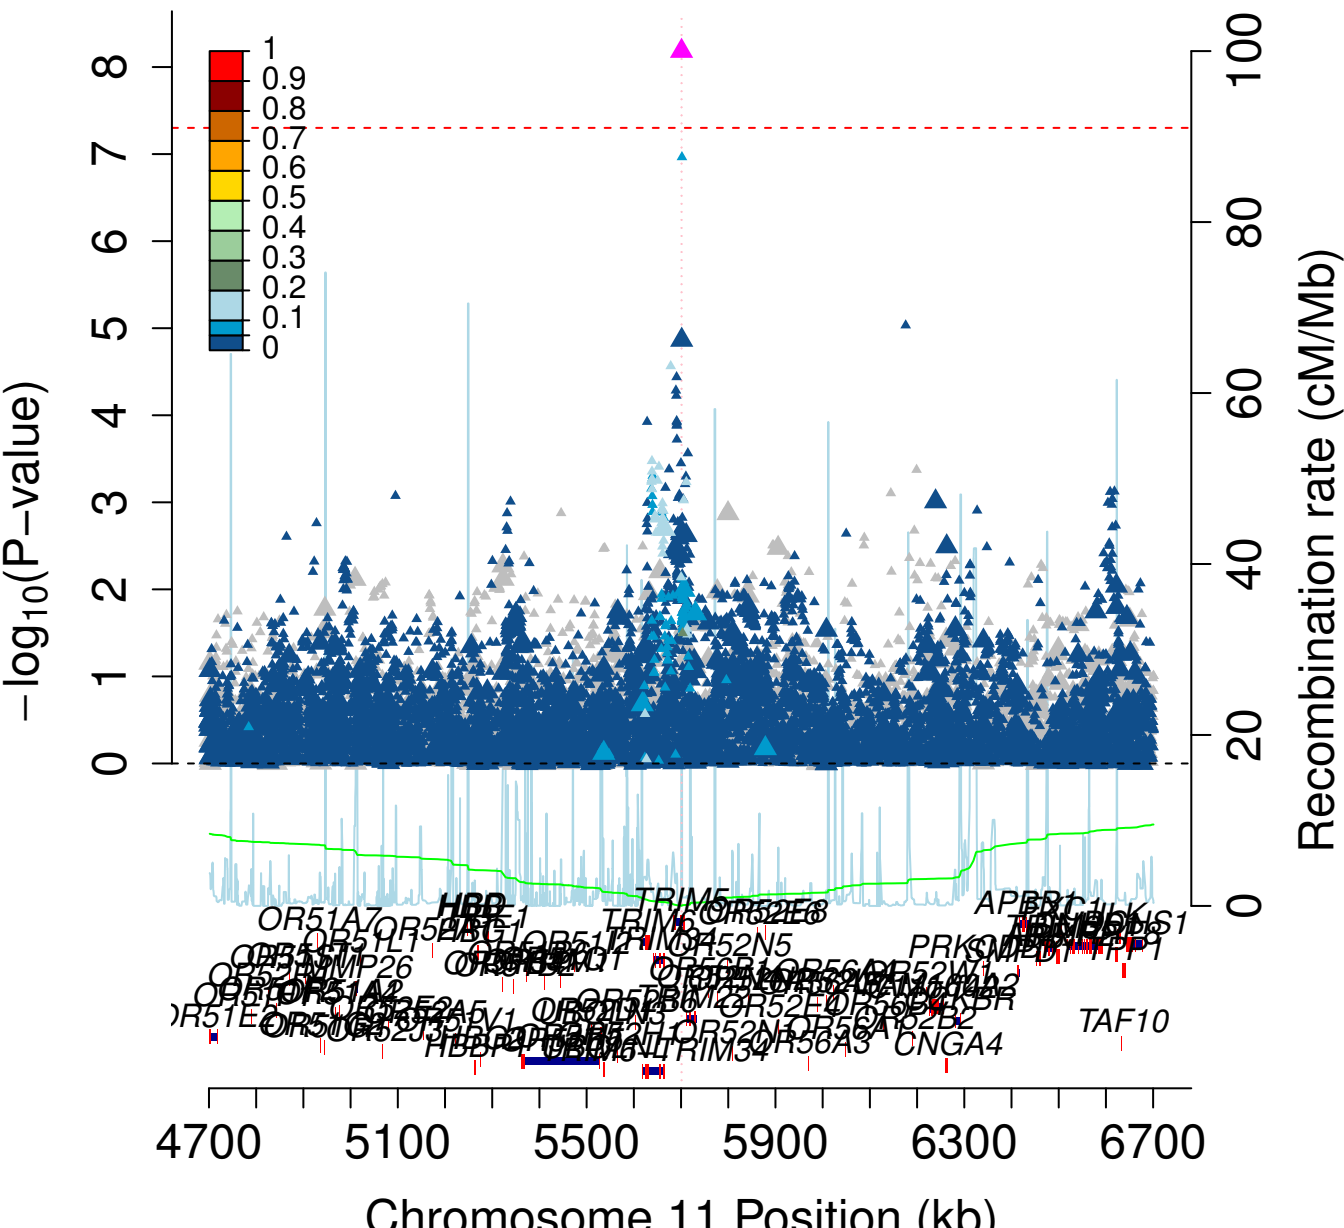

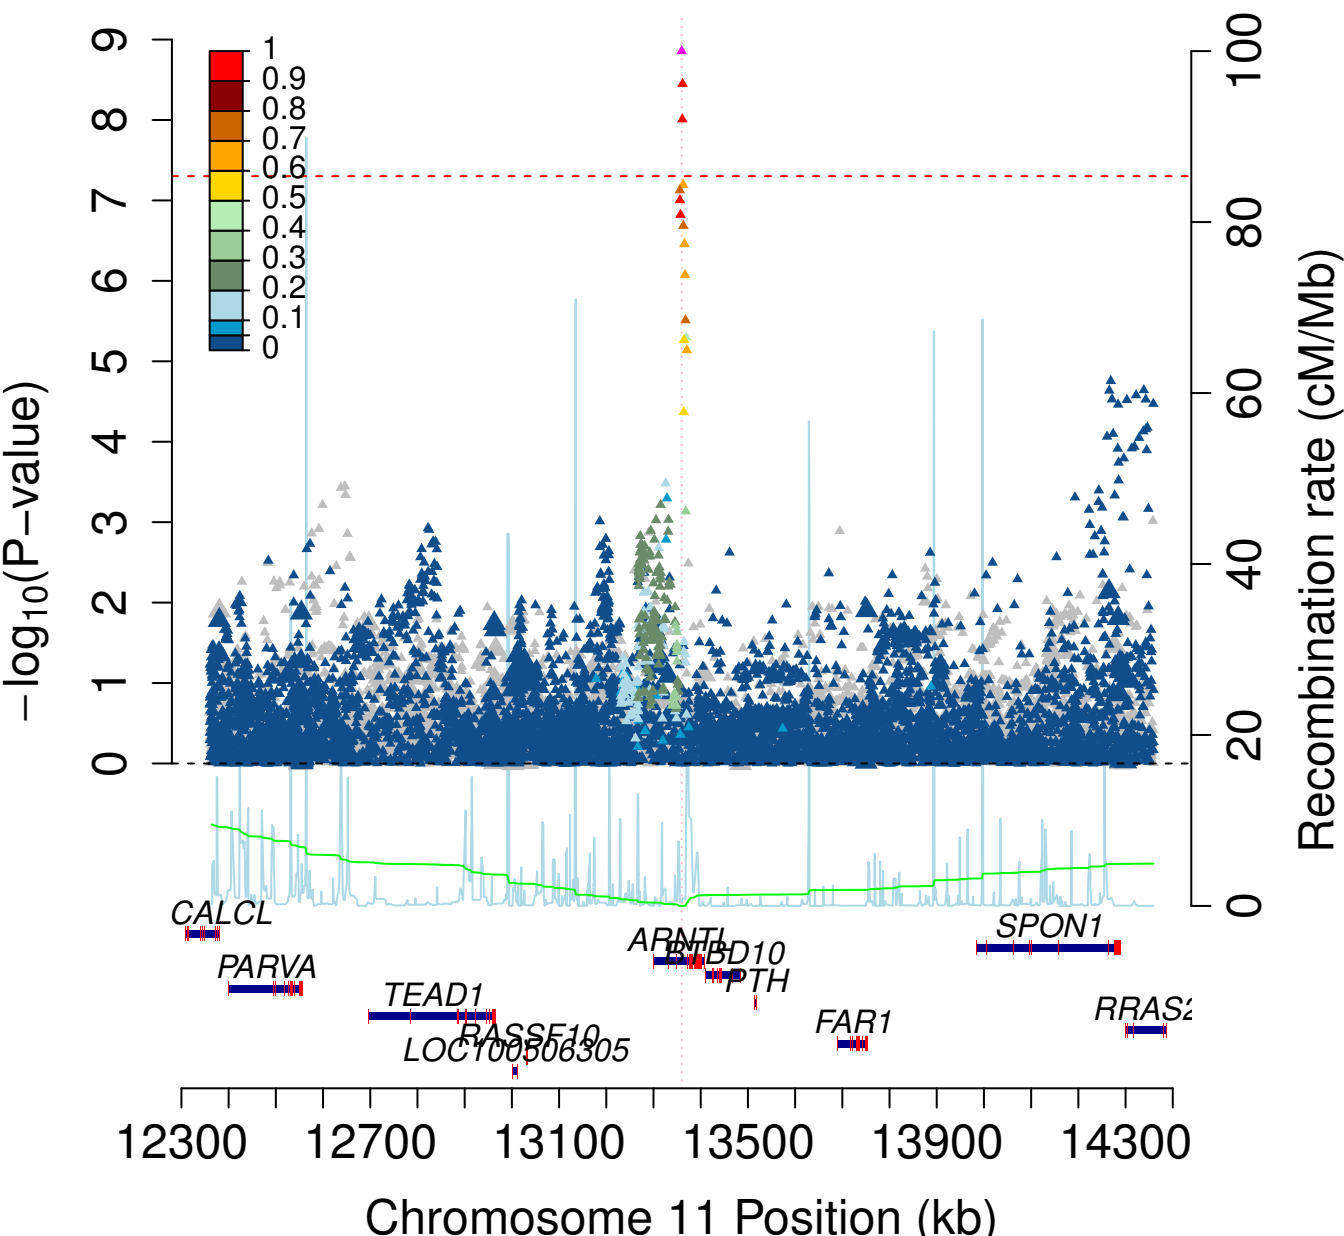

rs331446 – TG GG

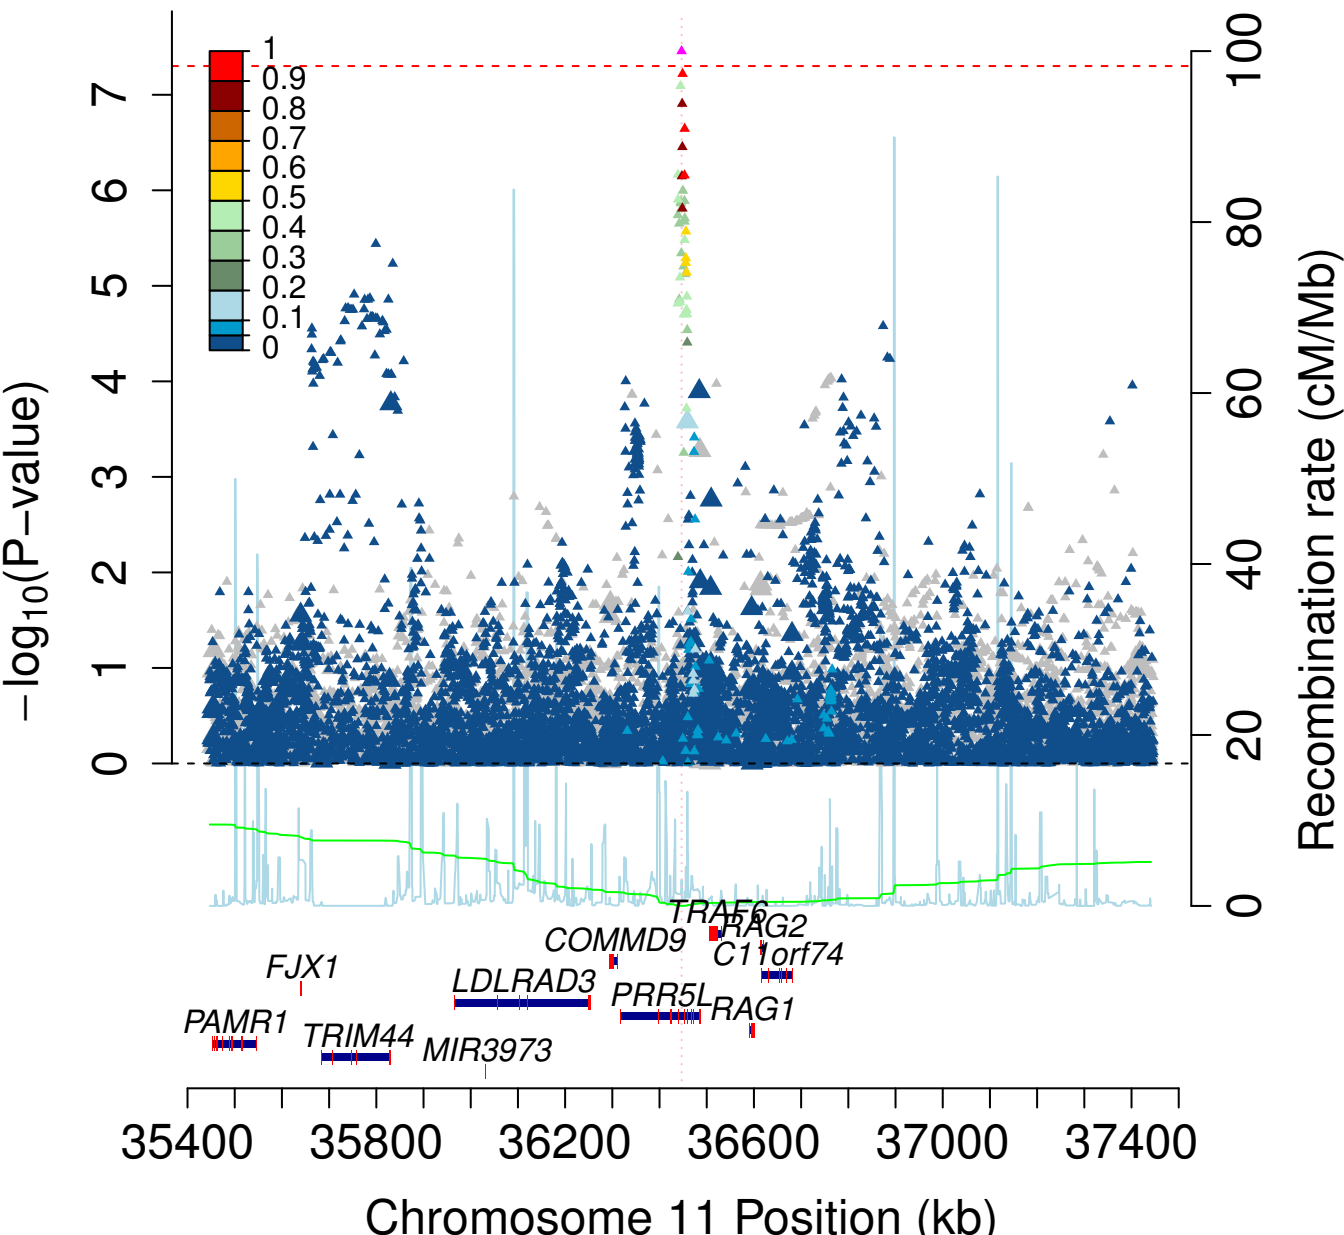



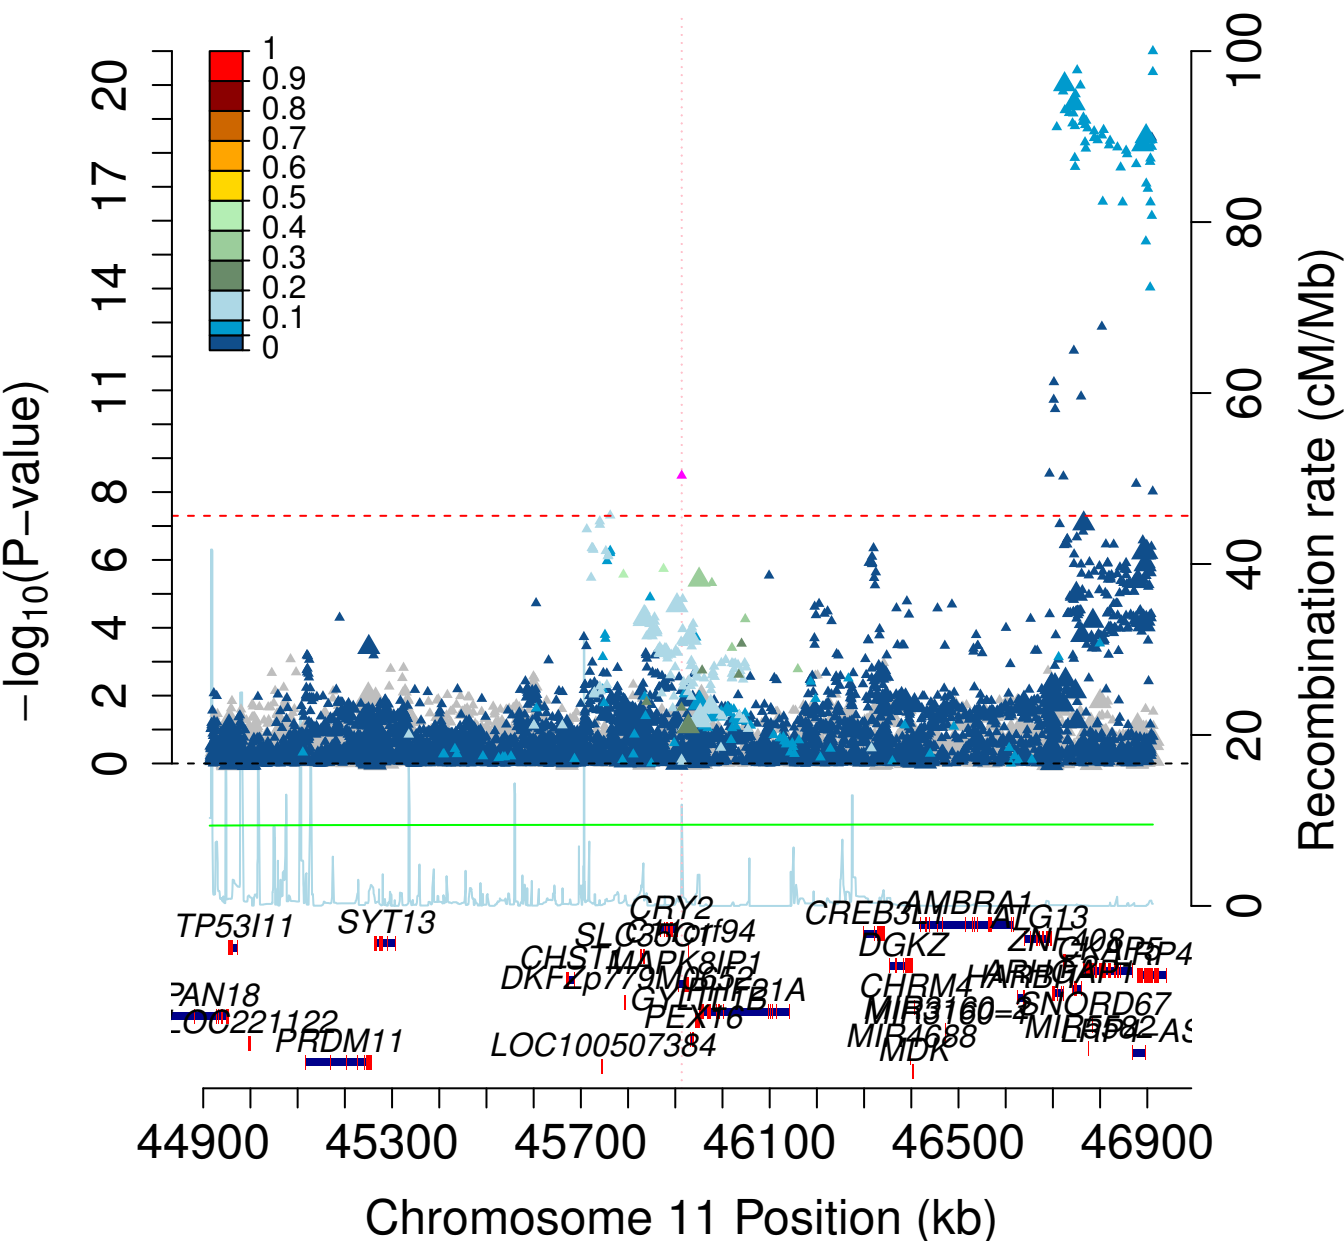





## rs10789752 – HDL GG

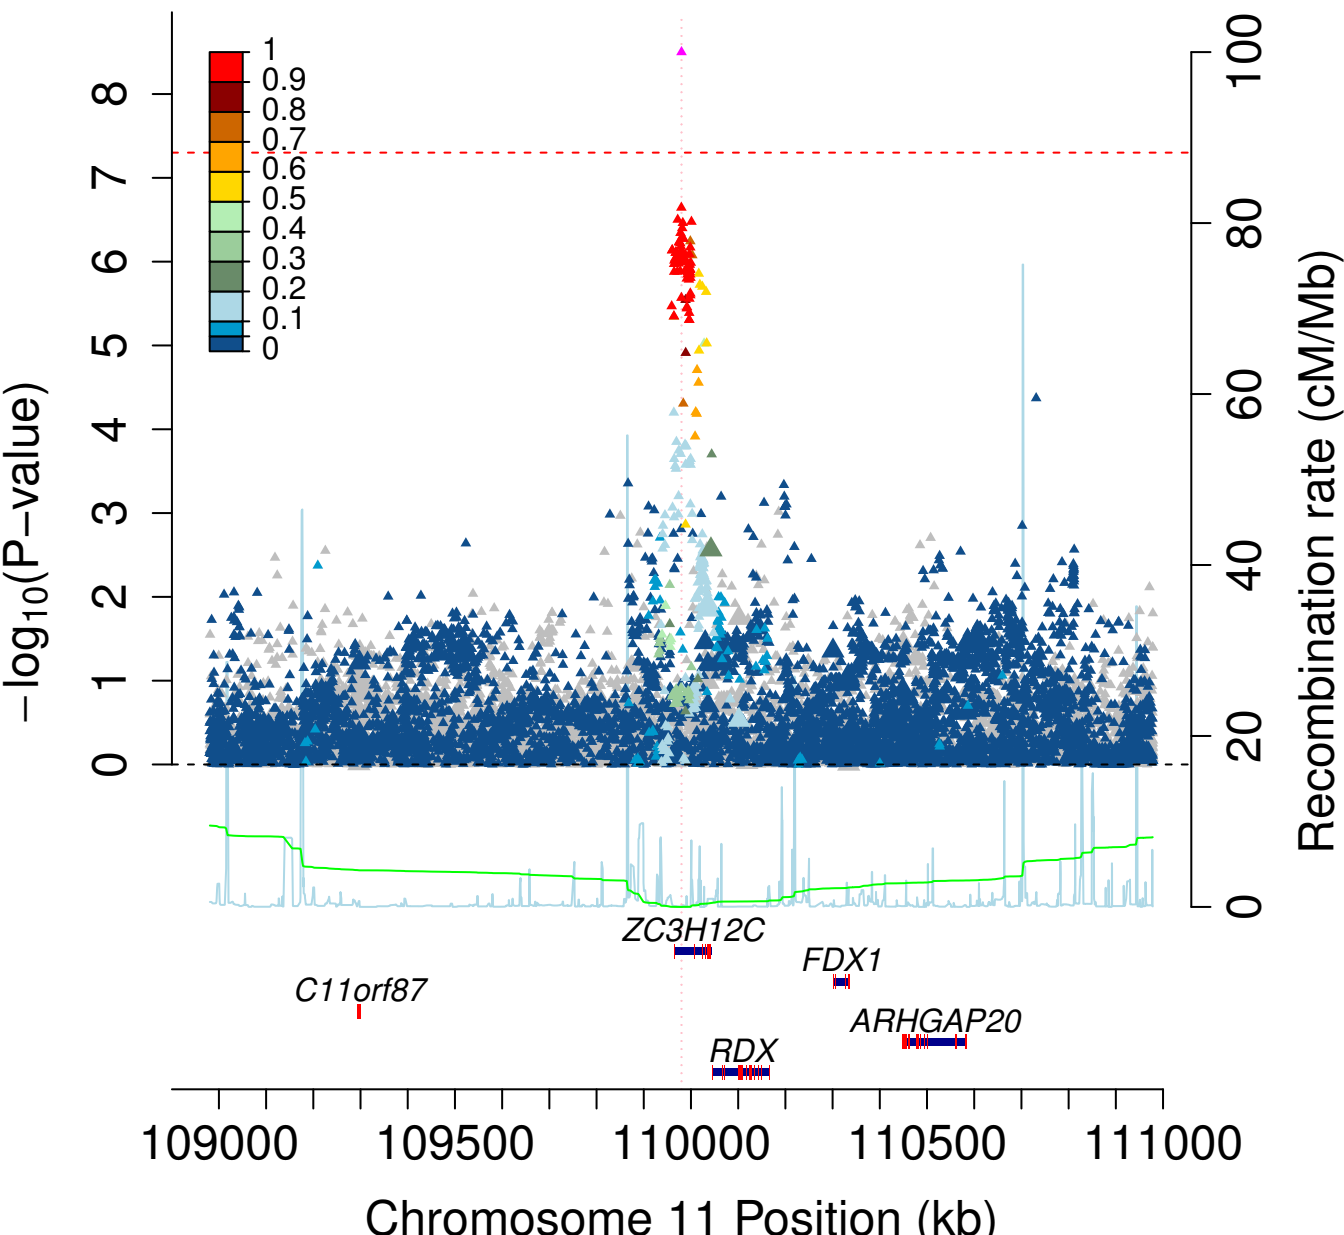

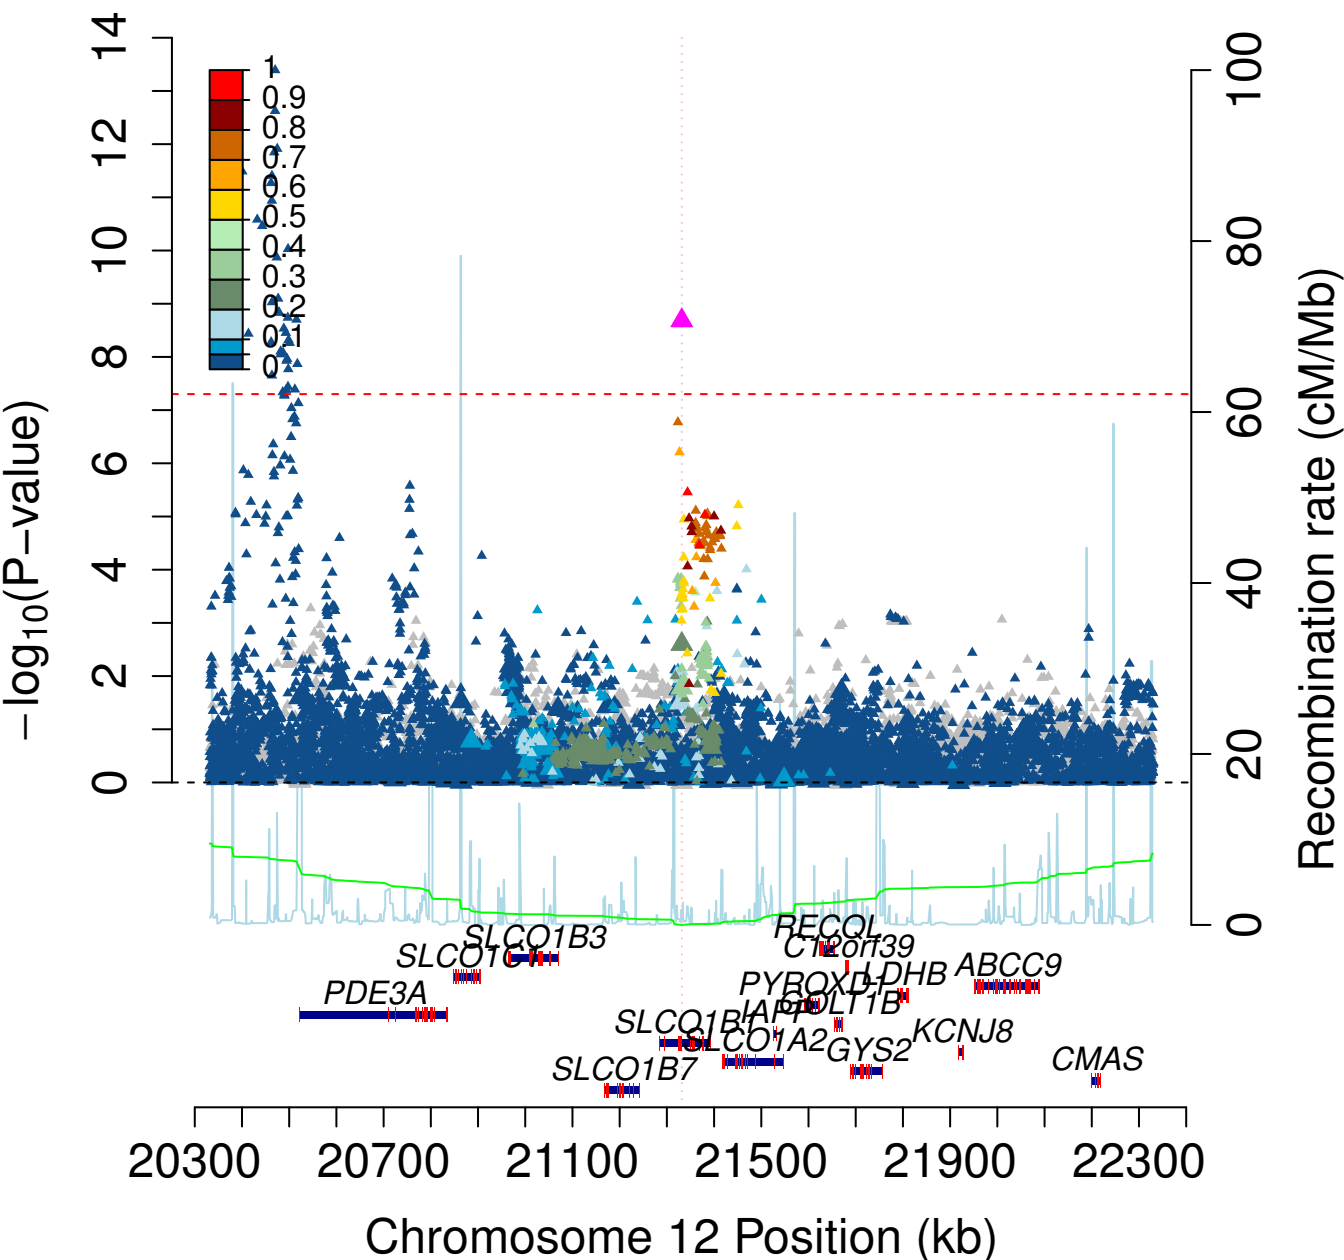

rs11048456 – HDL GG

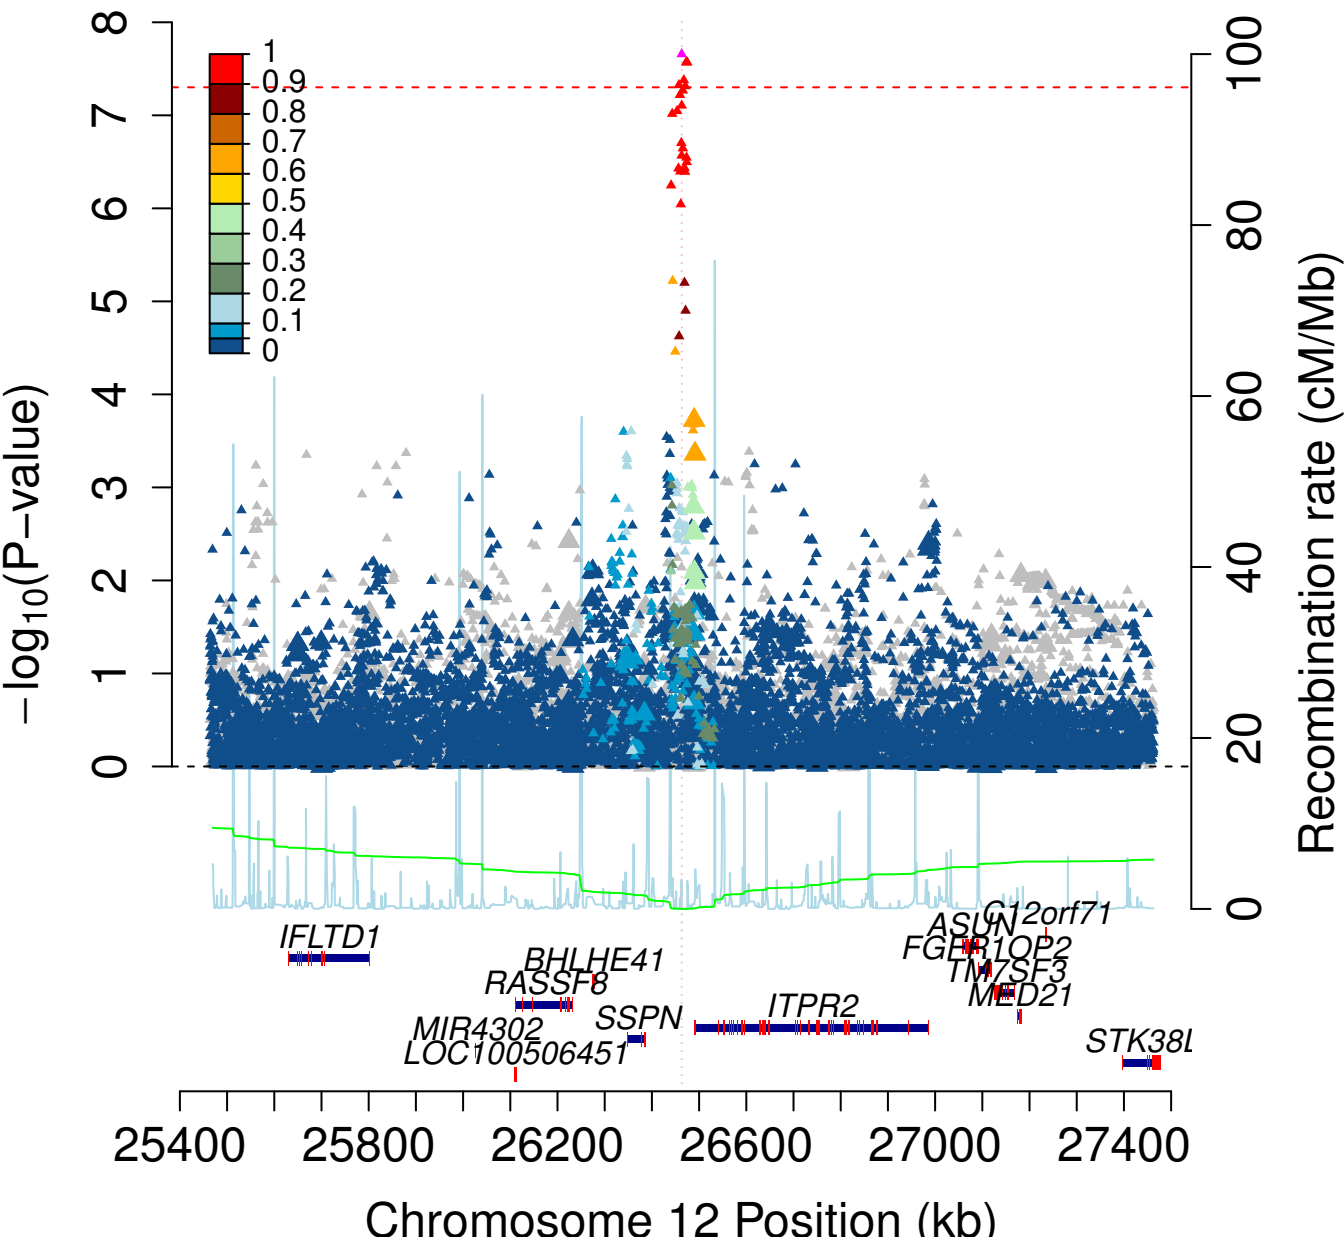

rs1907631 – LDL GG

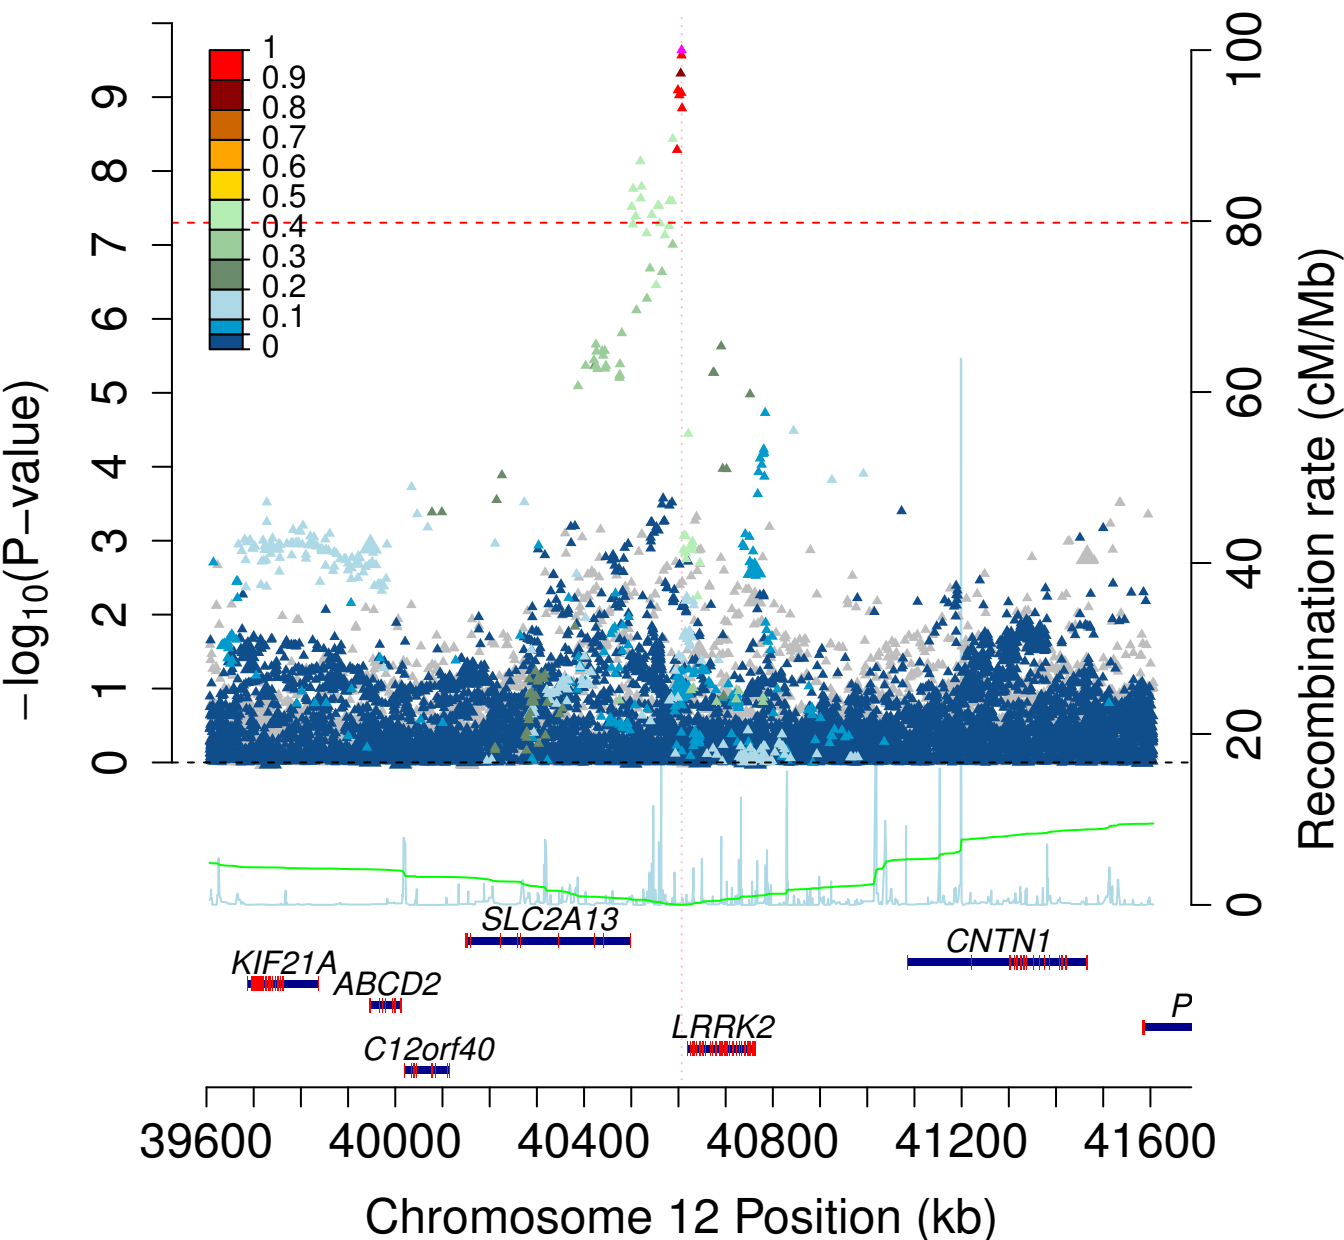







rs7955221 – TC GG

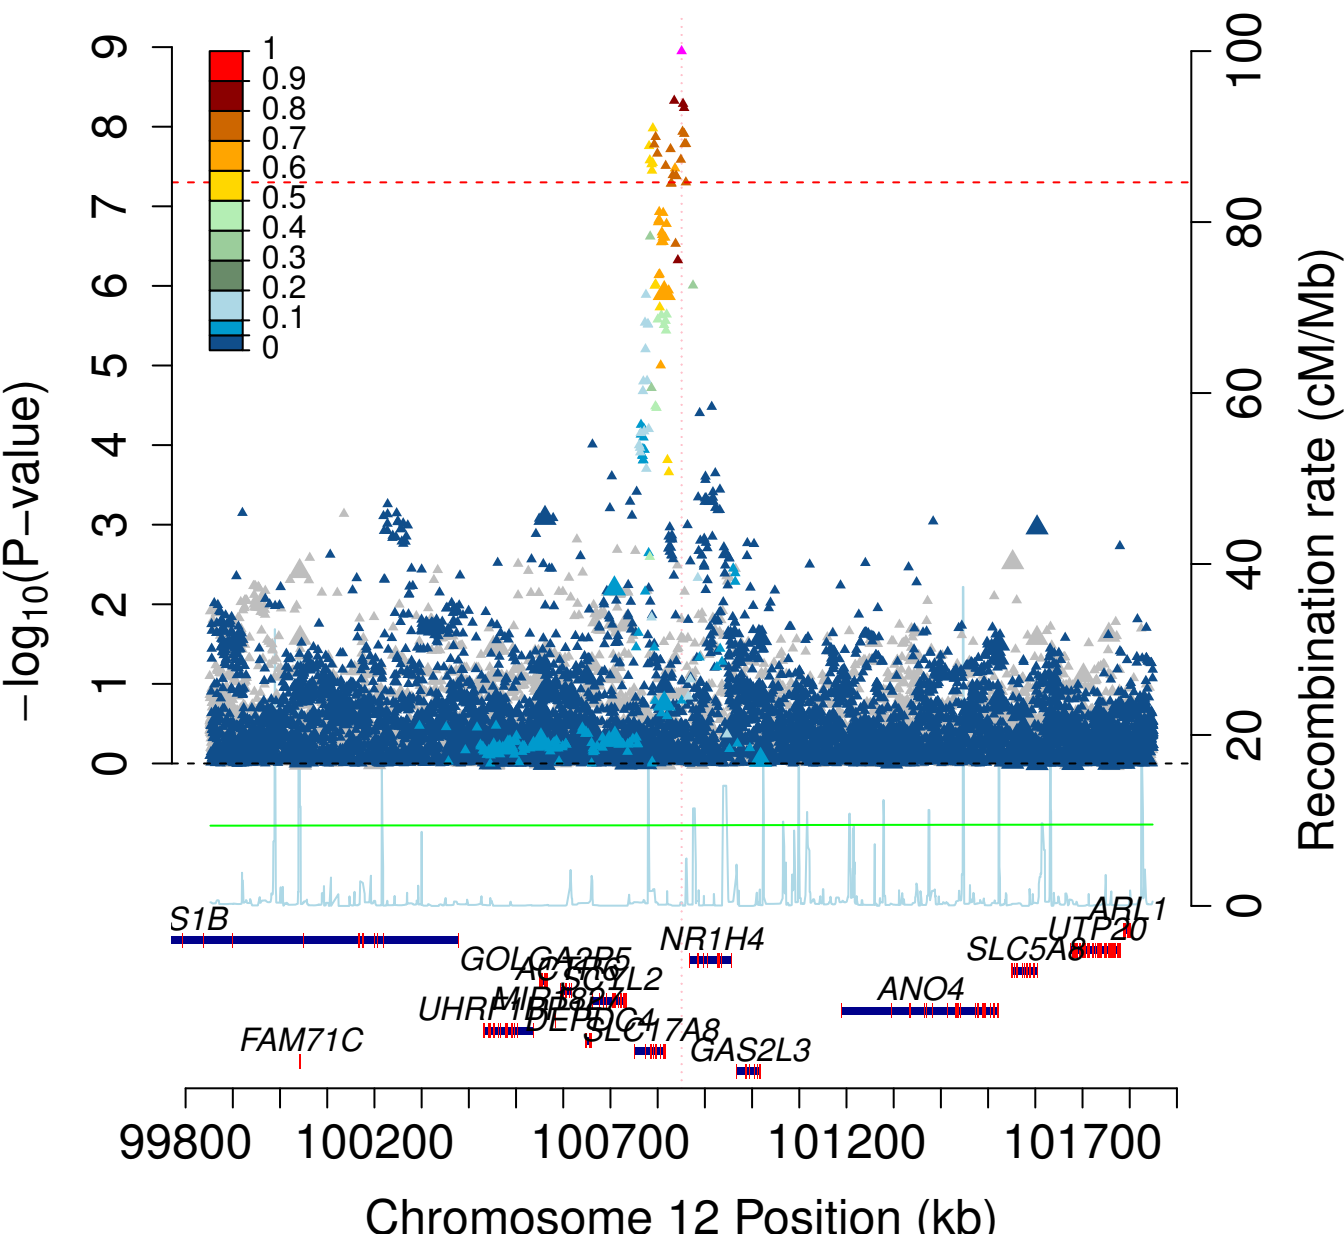

rs10778215 – TG GG

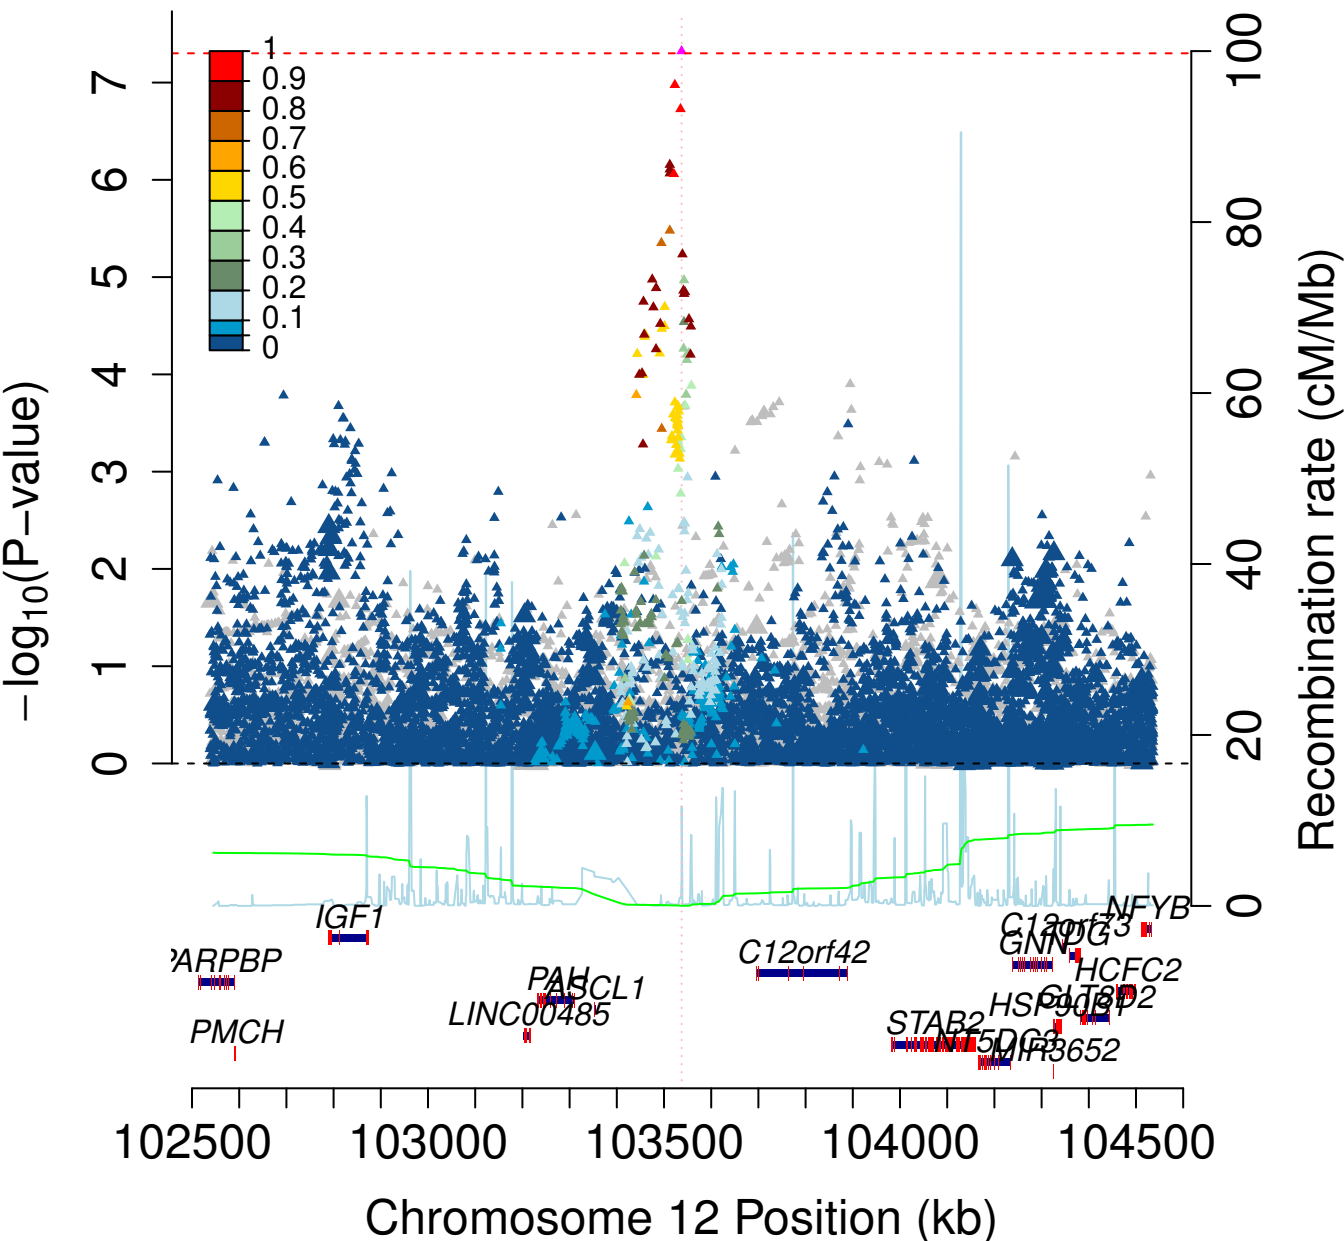

## rs7968419 – LDL GG

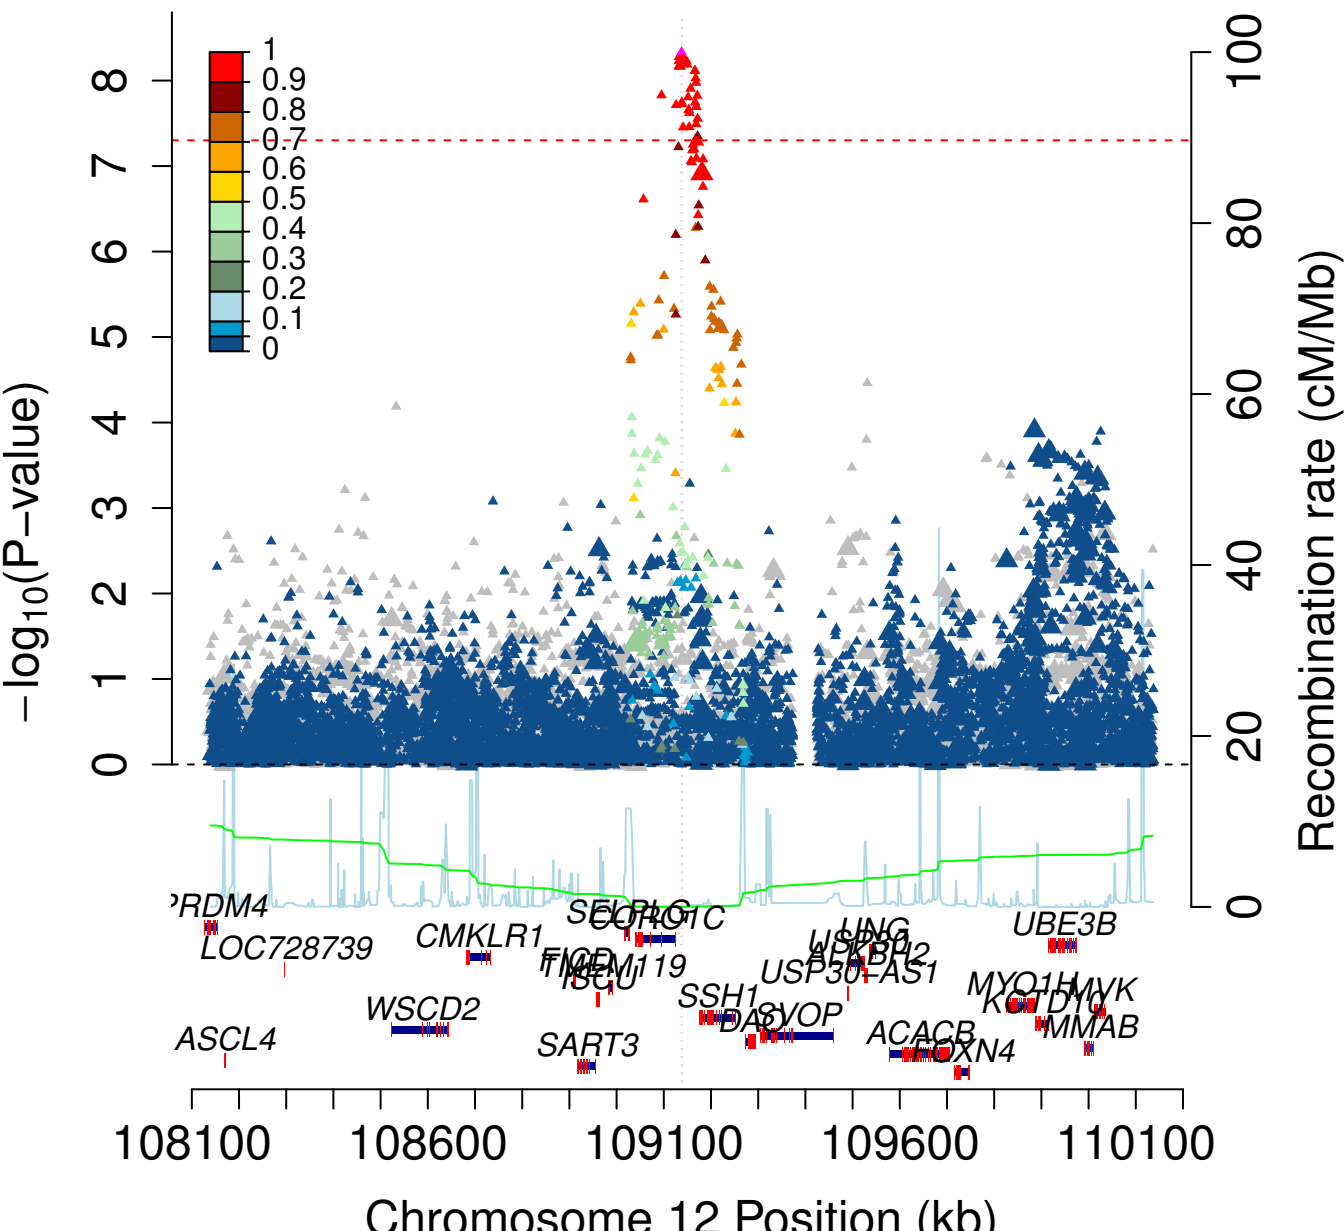

## rs2812208 – TG G

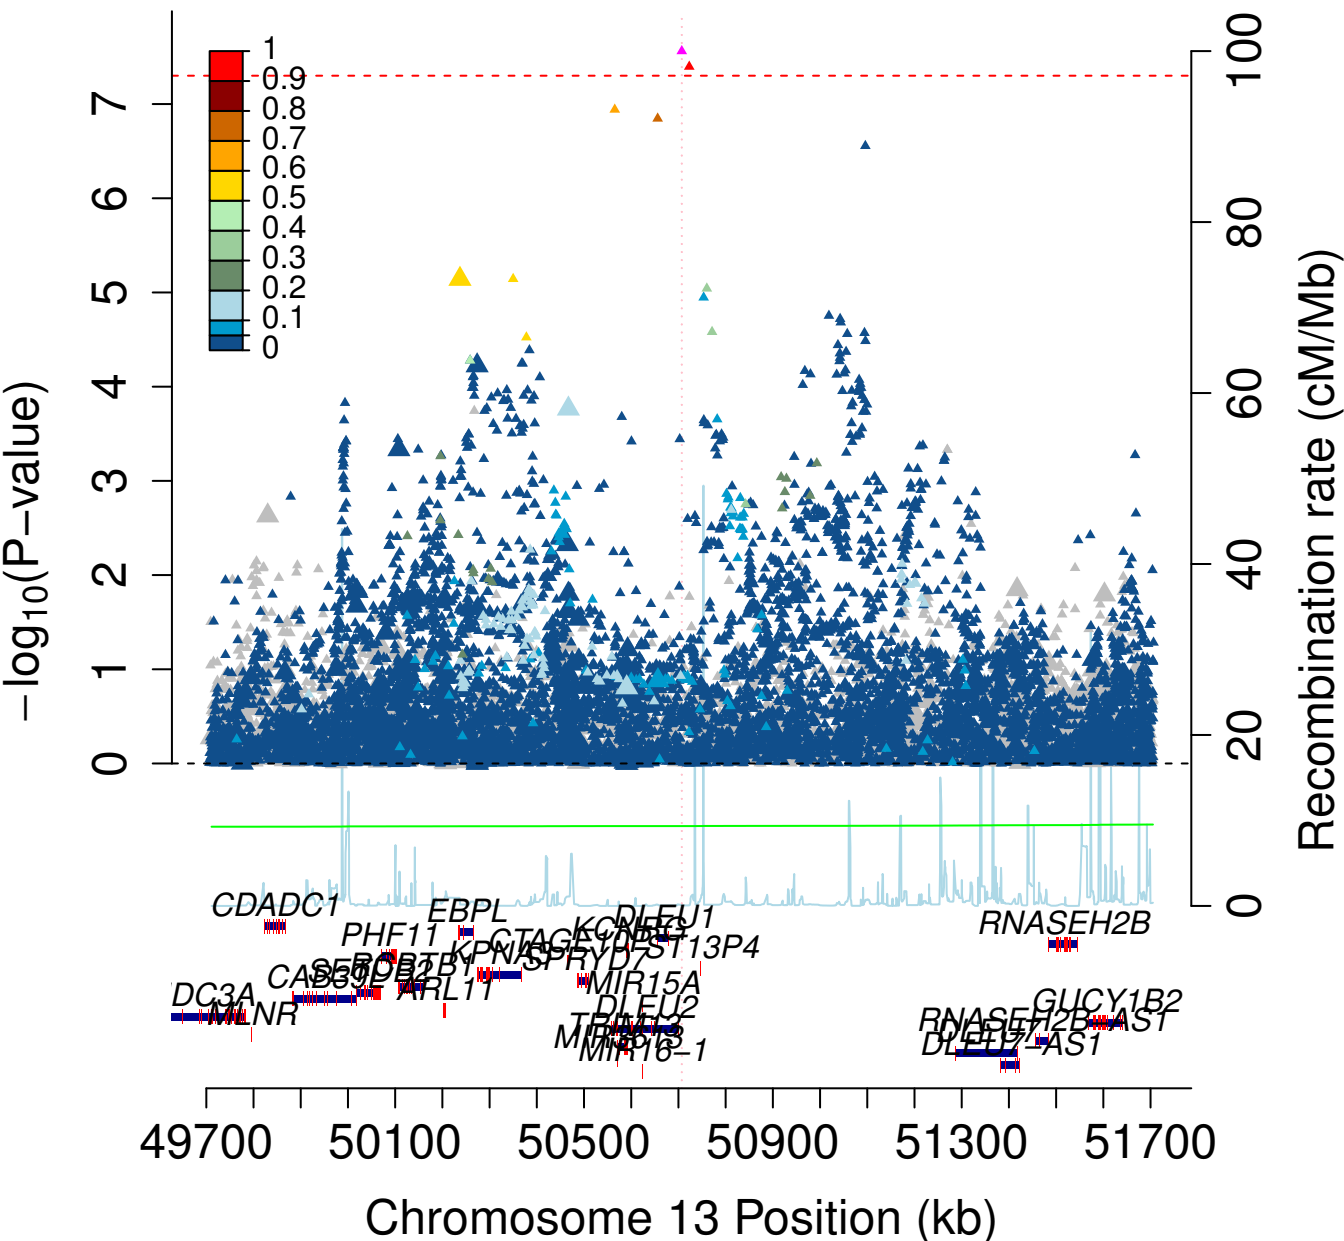

rs9556404 – TG GG

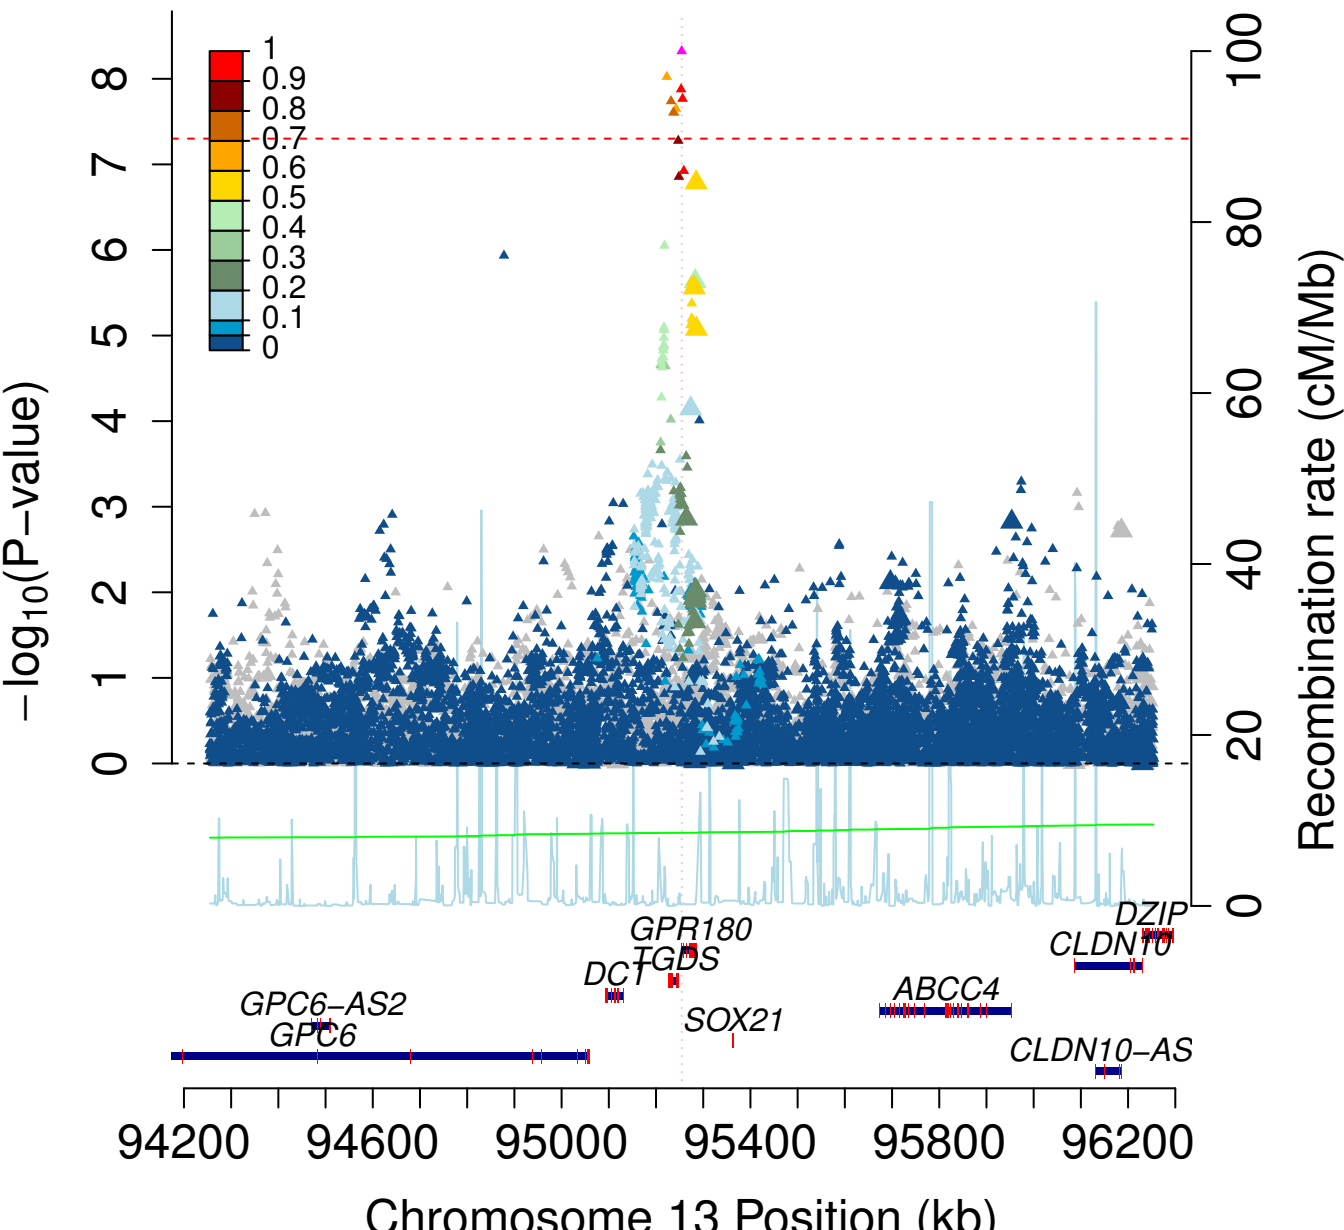

rs7333748 – TG GG

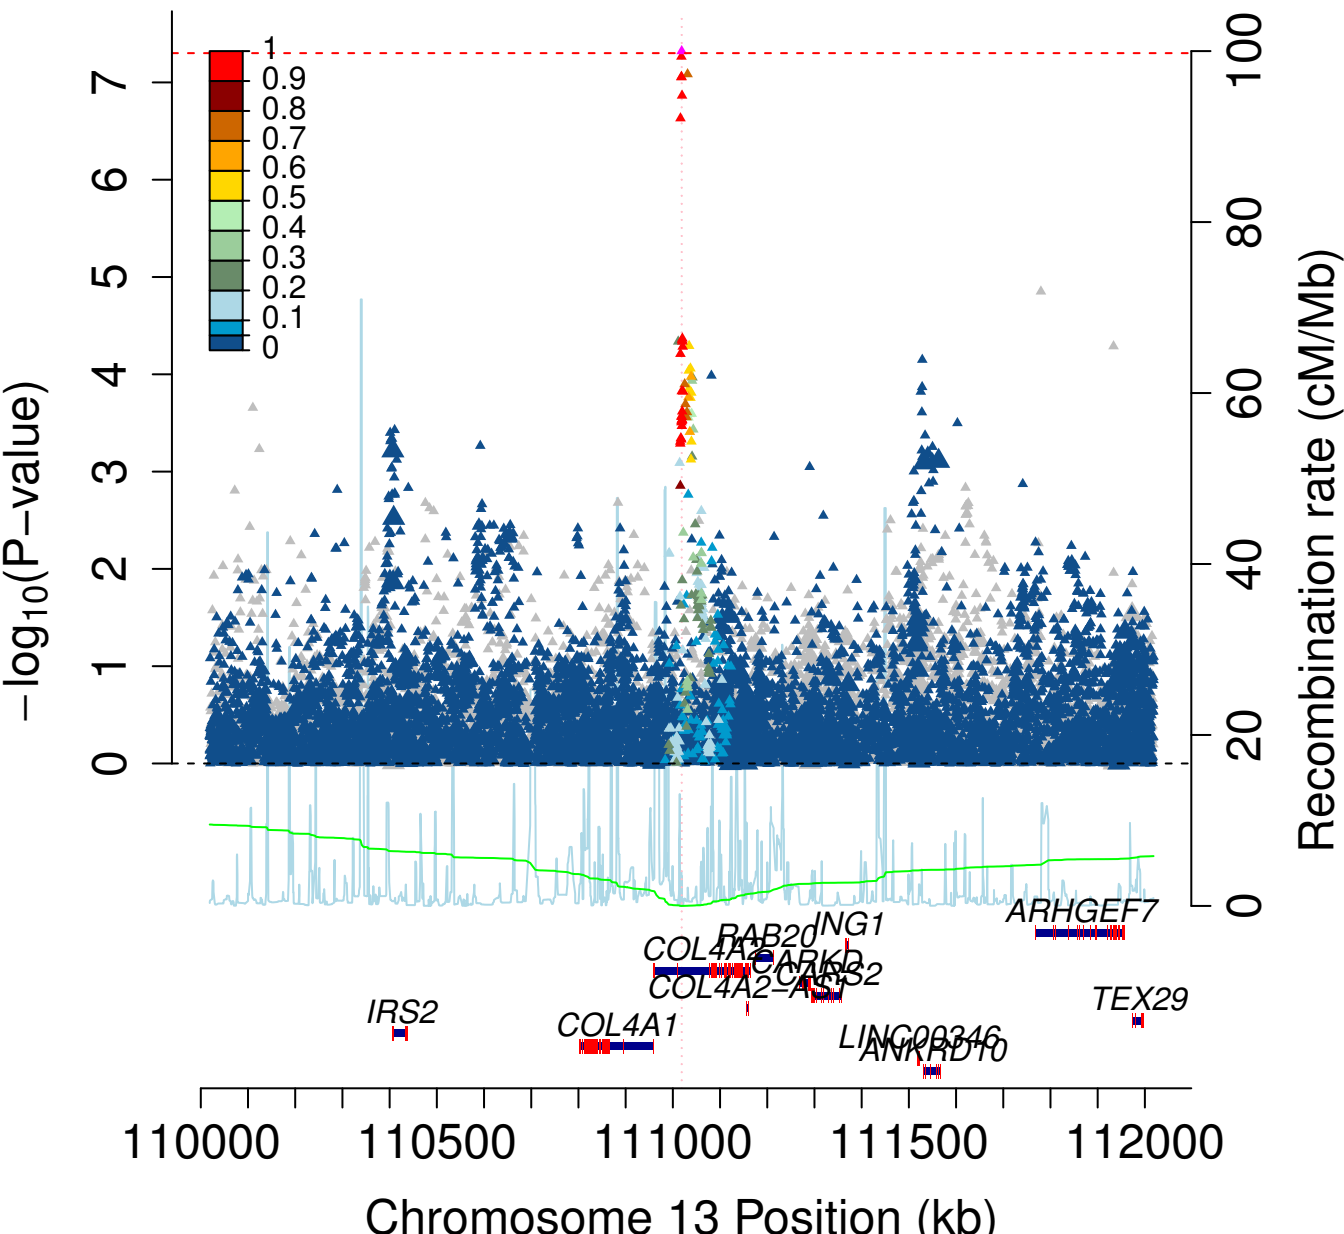

## rs7148864 – HDL G

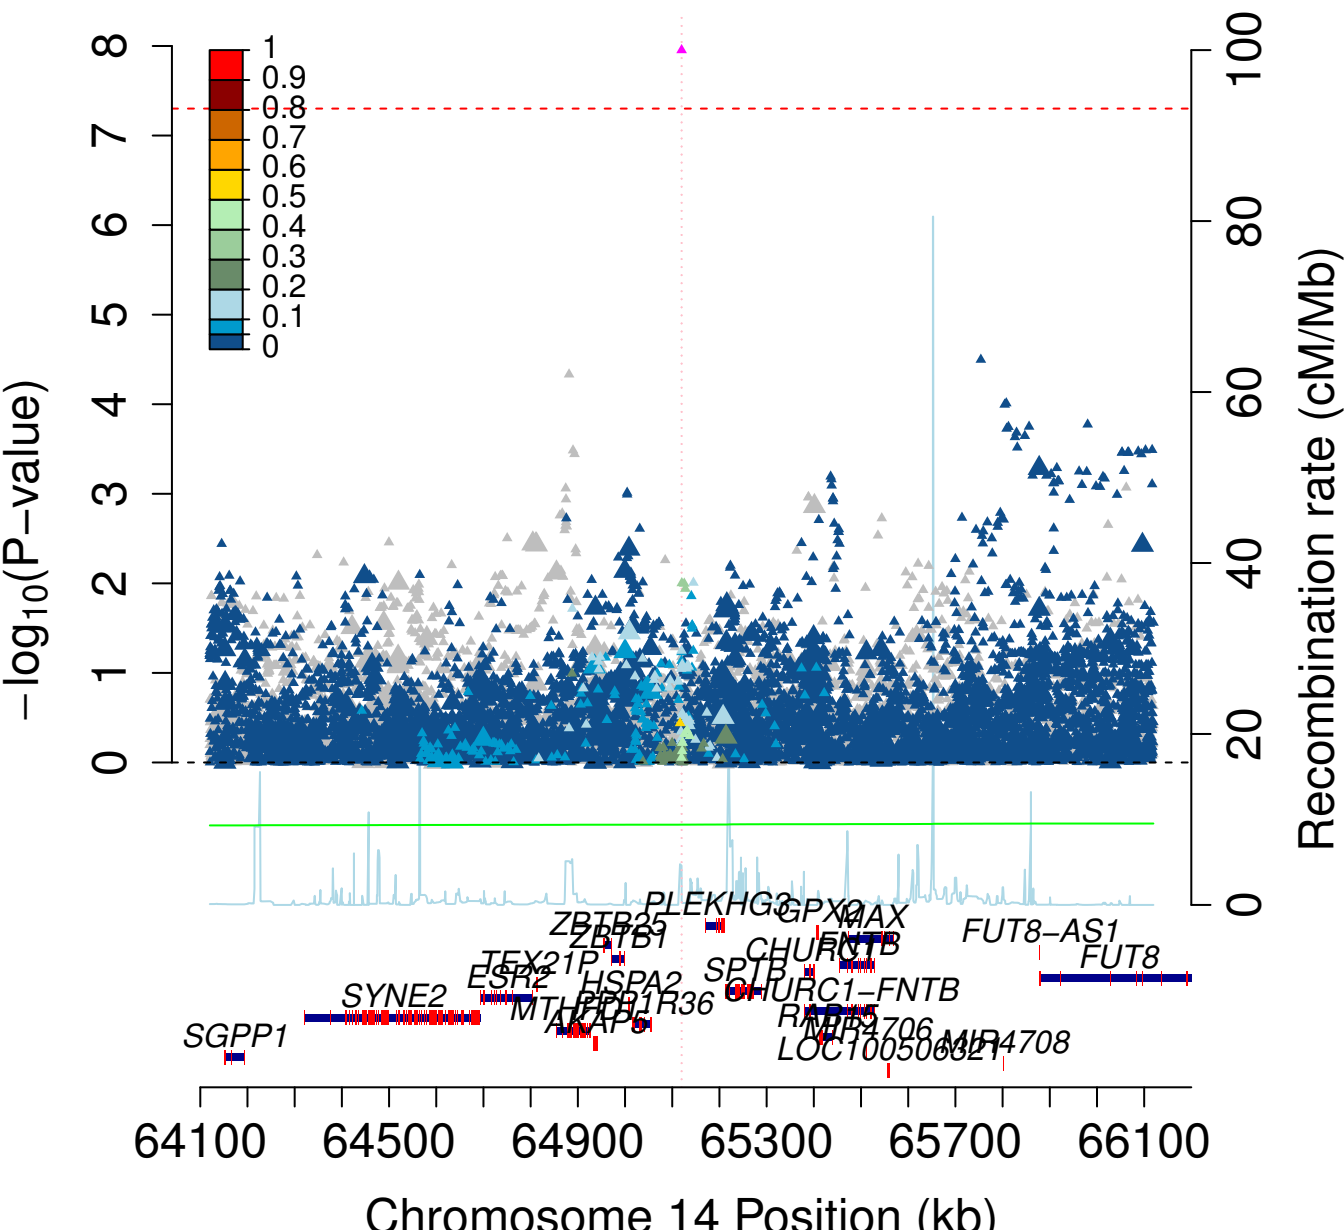



## rs11620731 – LDL G

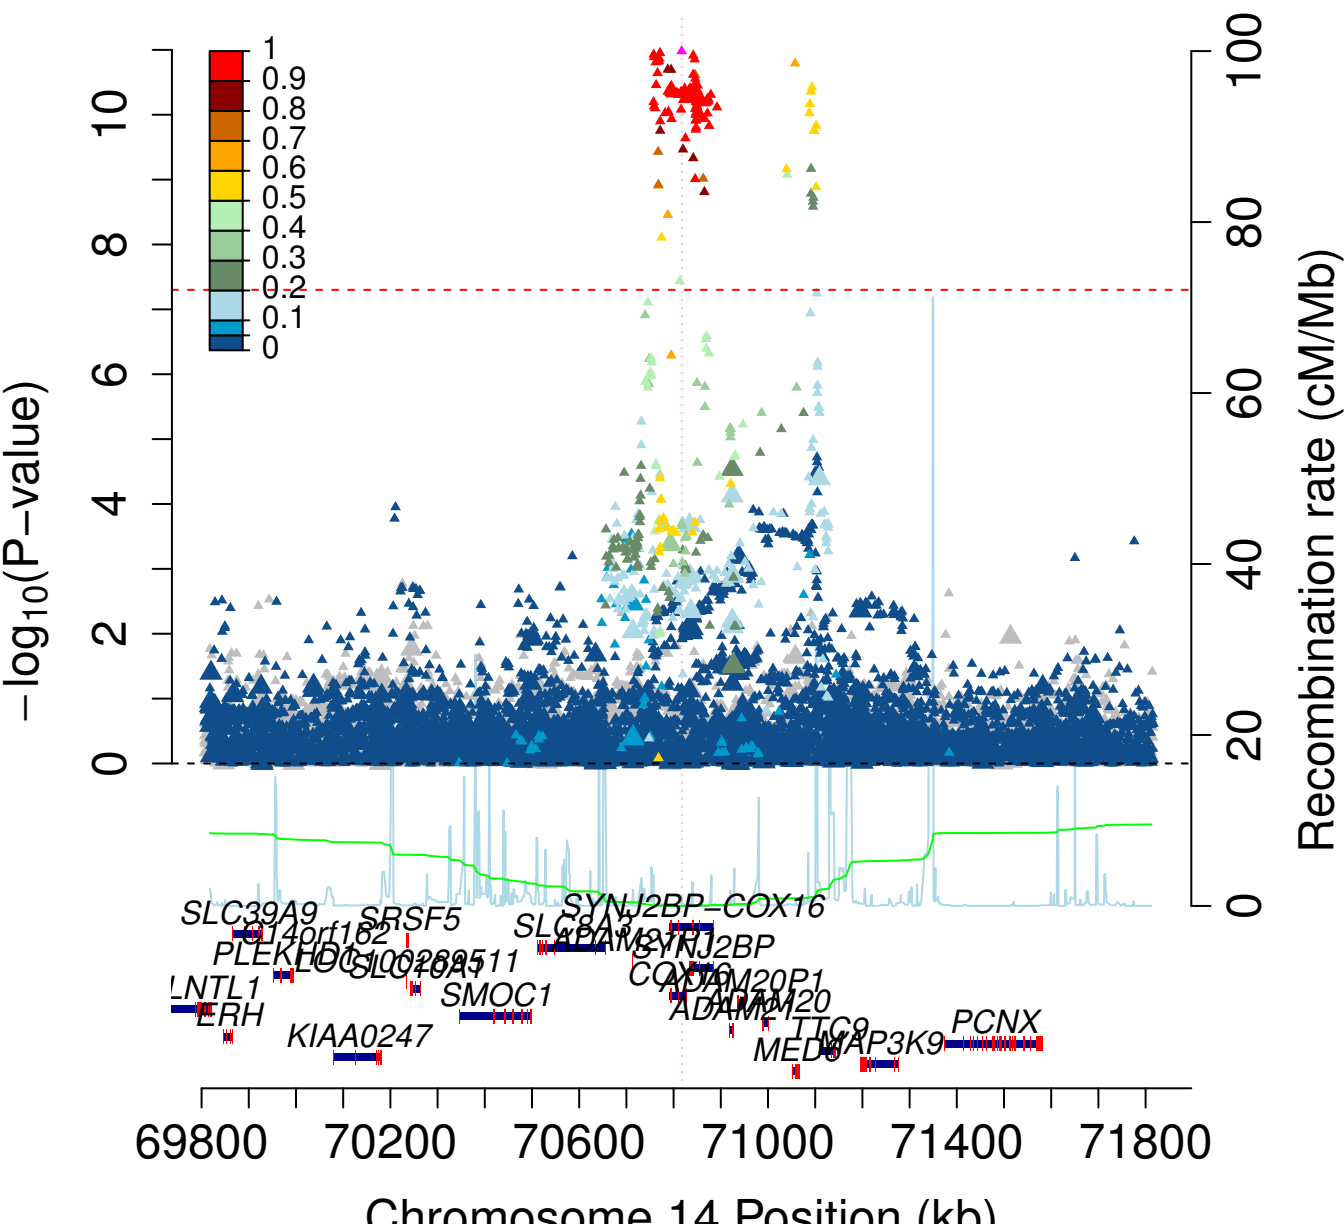

rs12588415 – TC GG

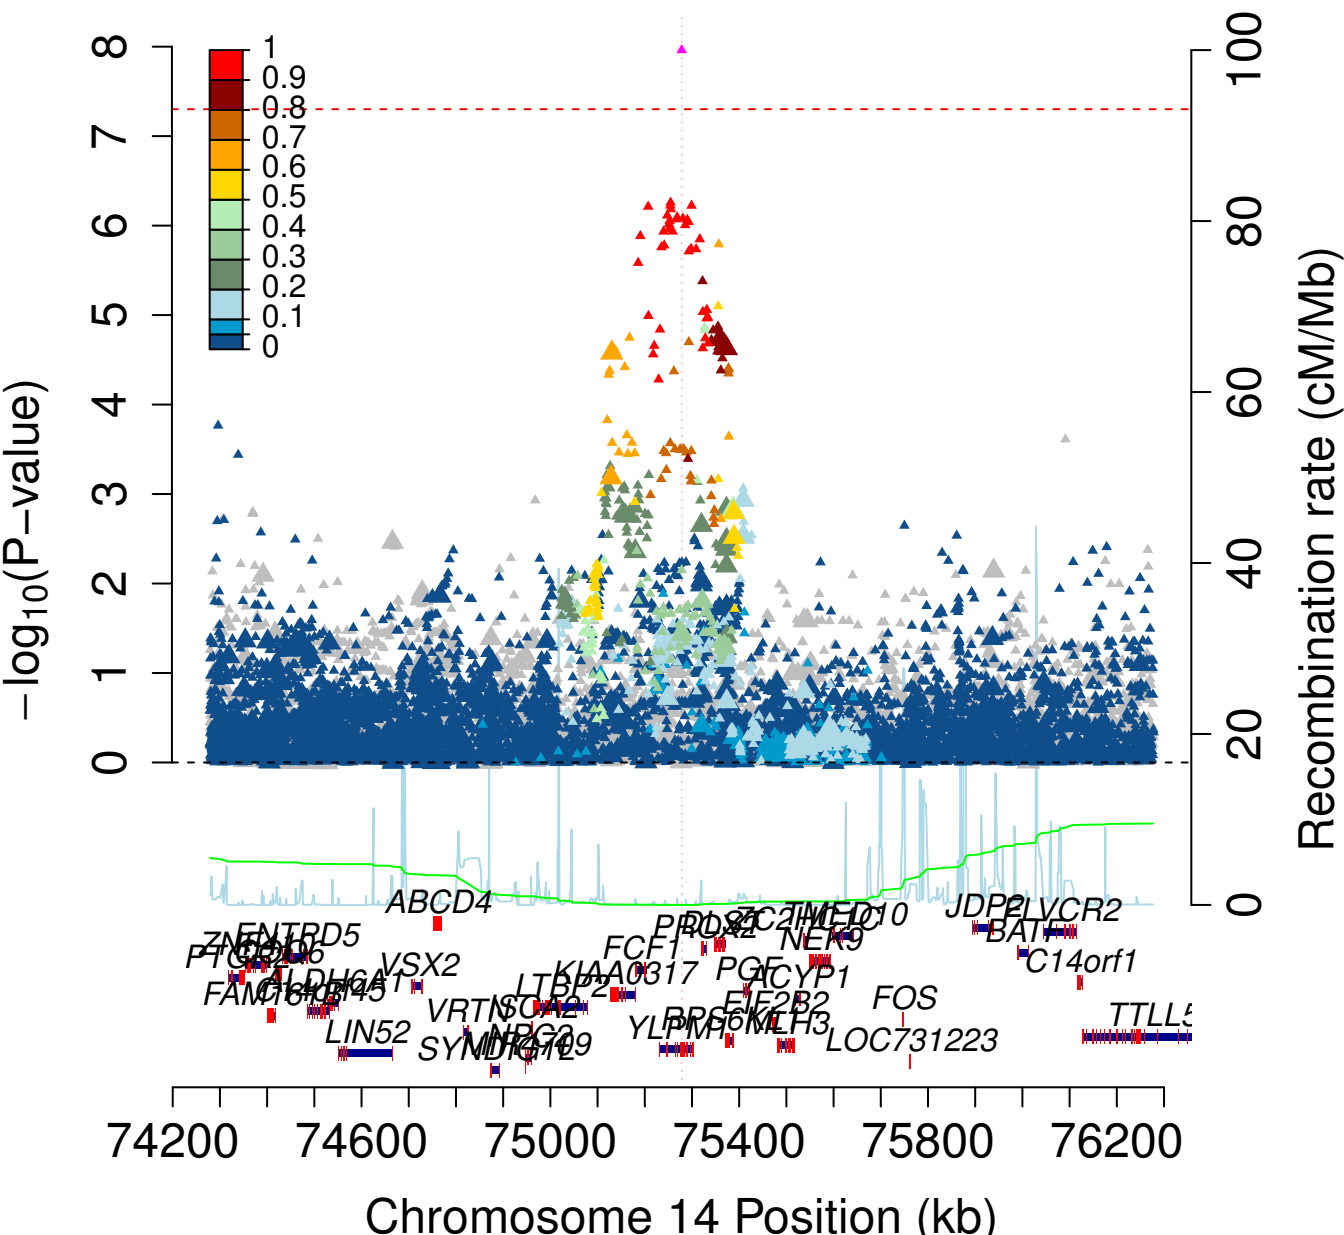



## chr14:92498829:D – HDL G

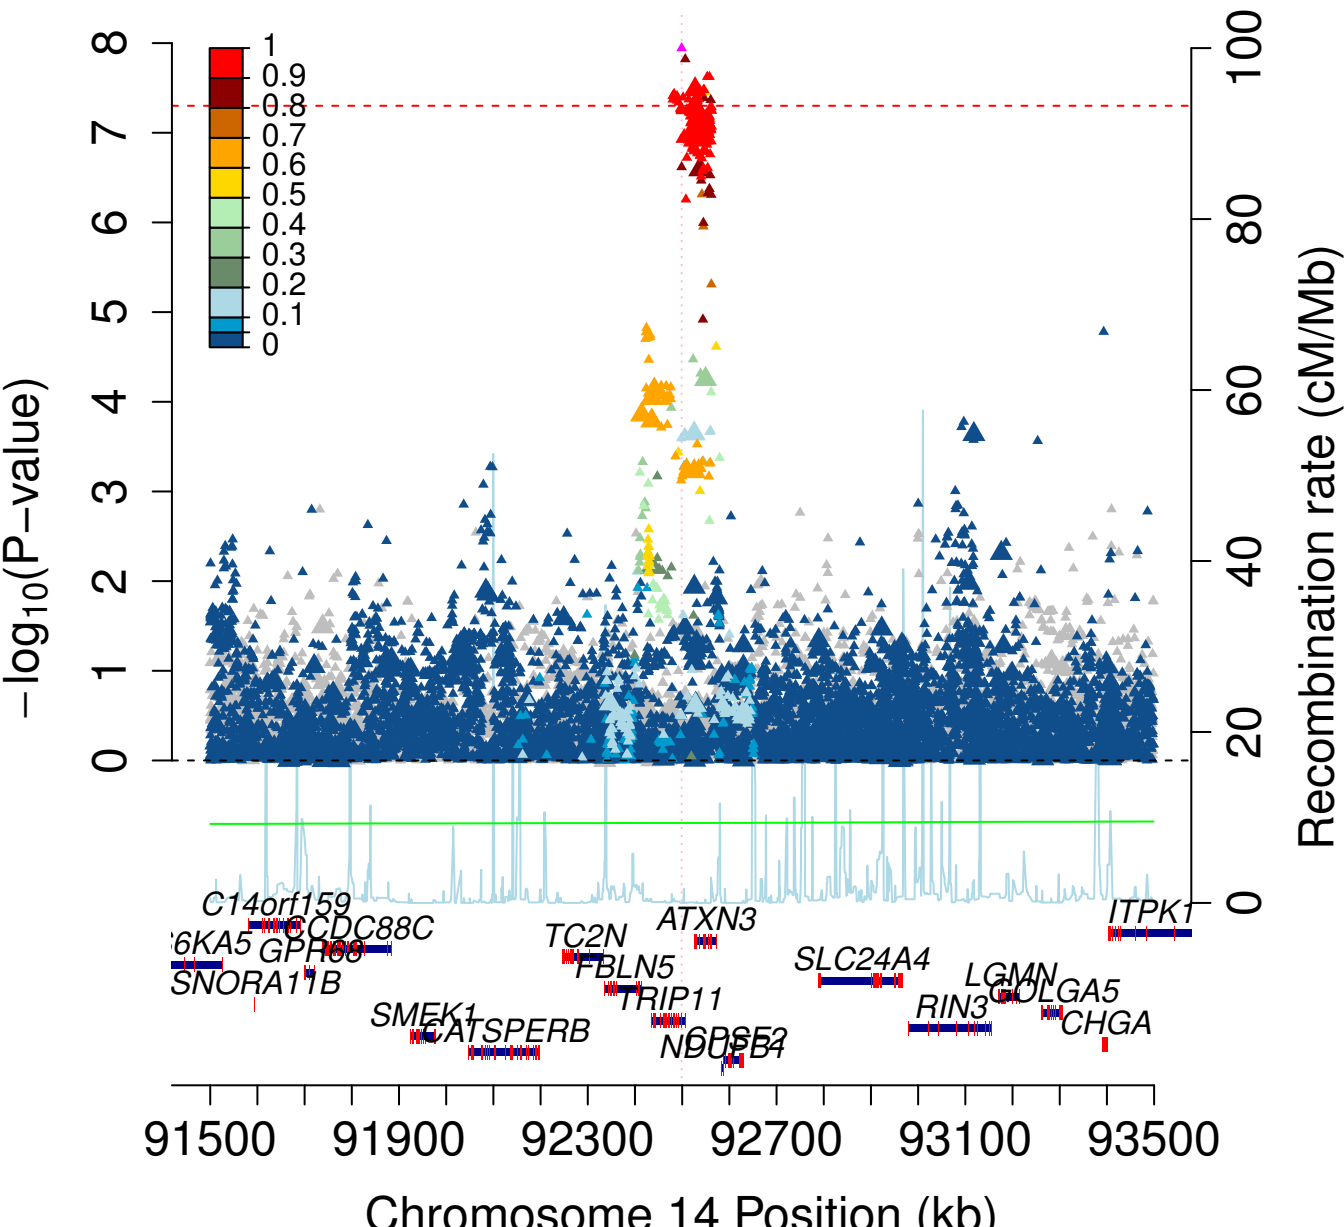

## rs17580 – LDL G

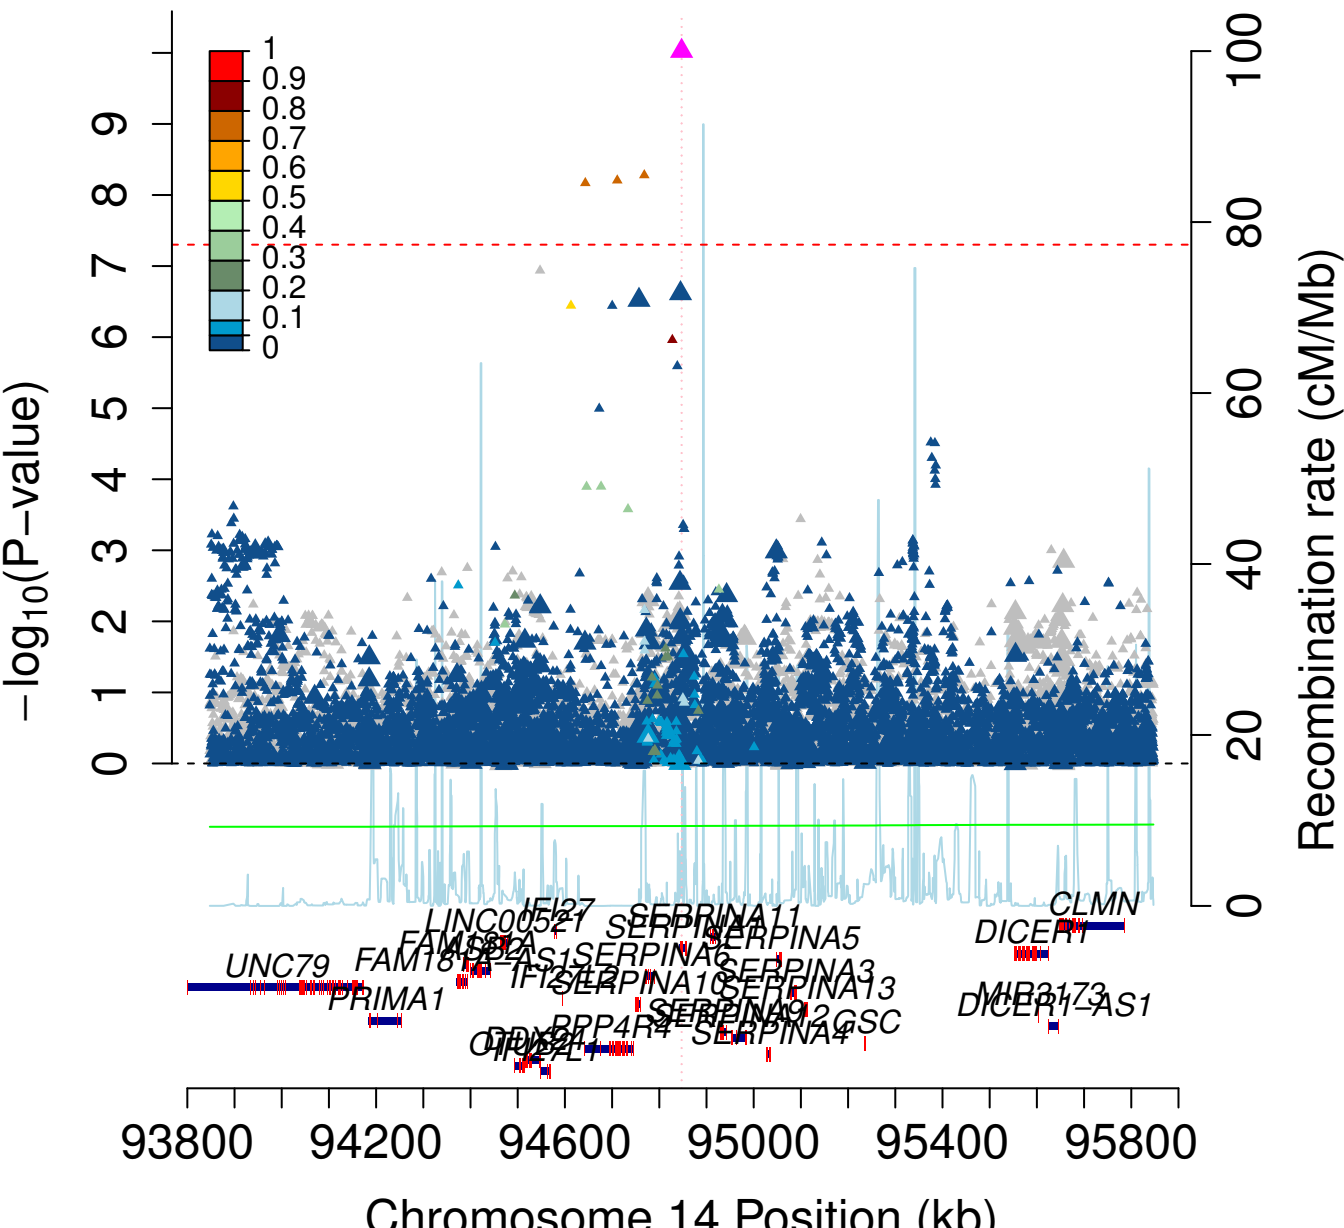



rs72731954 – TC GG

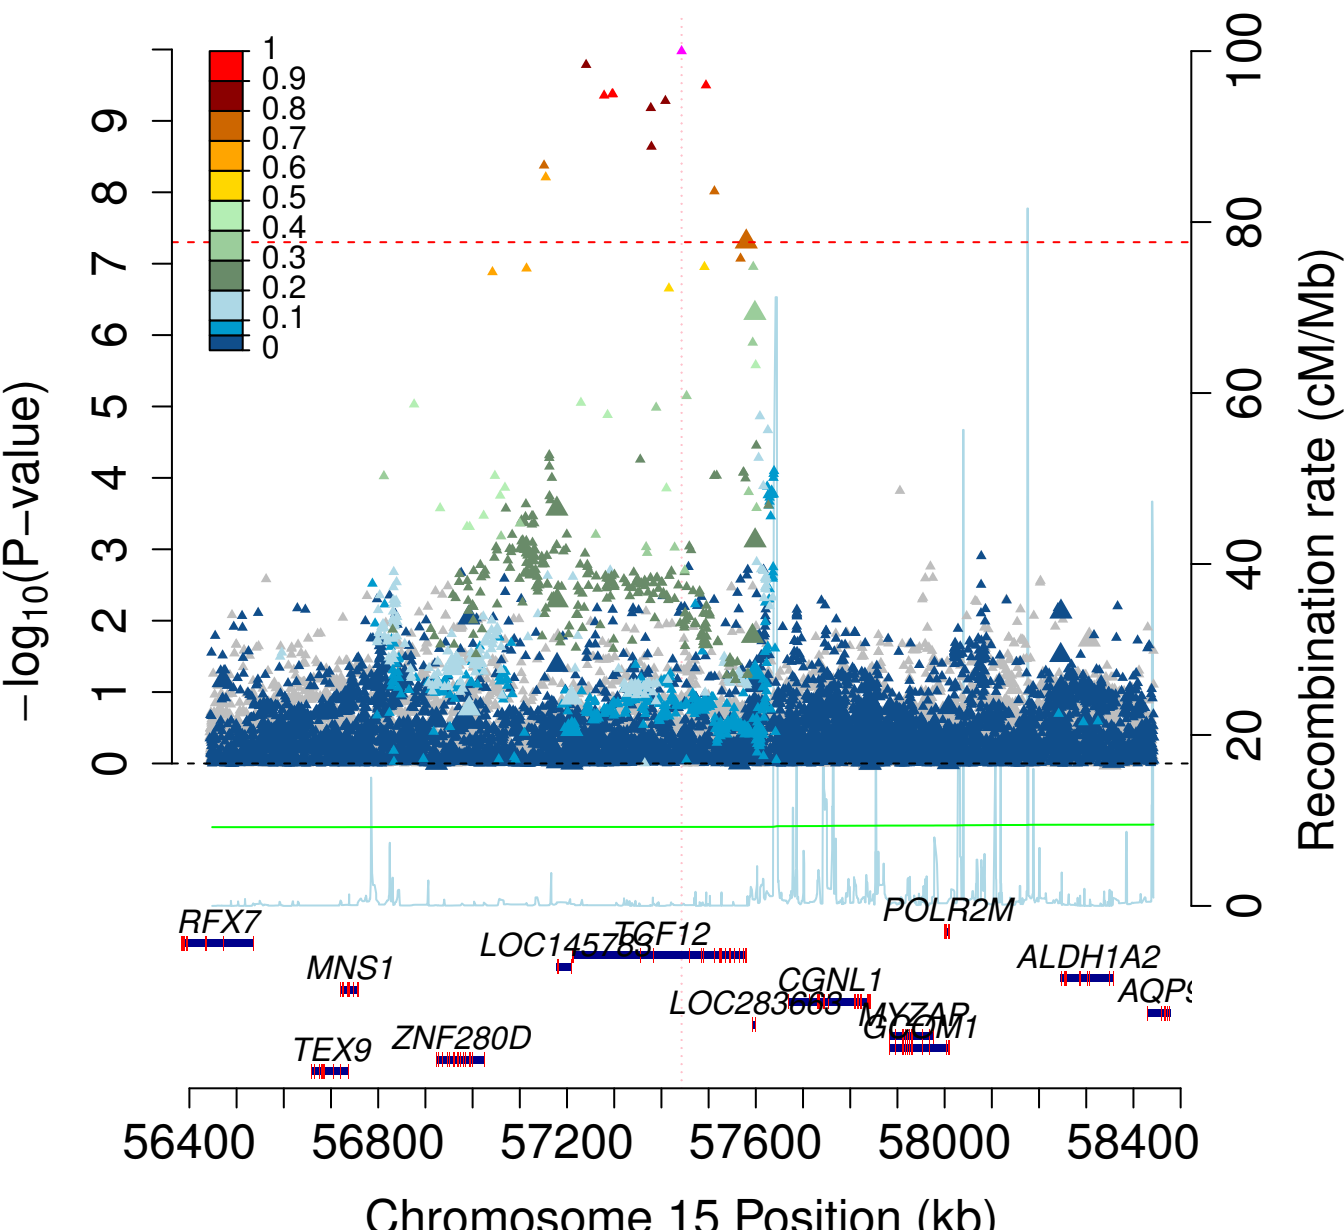





## rs1037116 – HDL GG

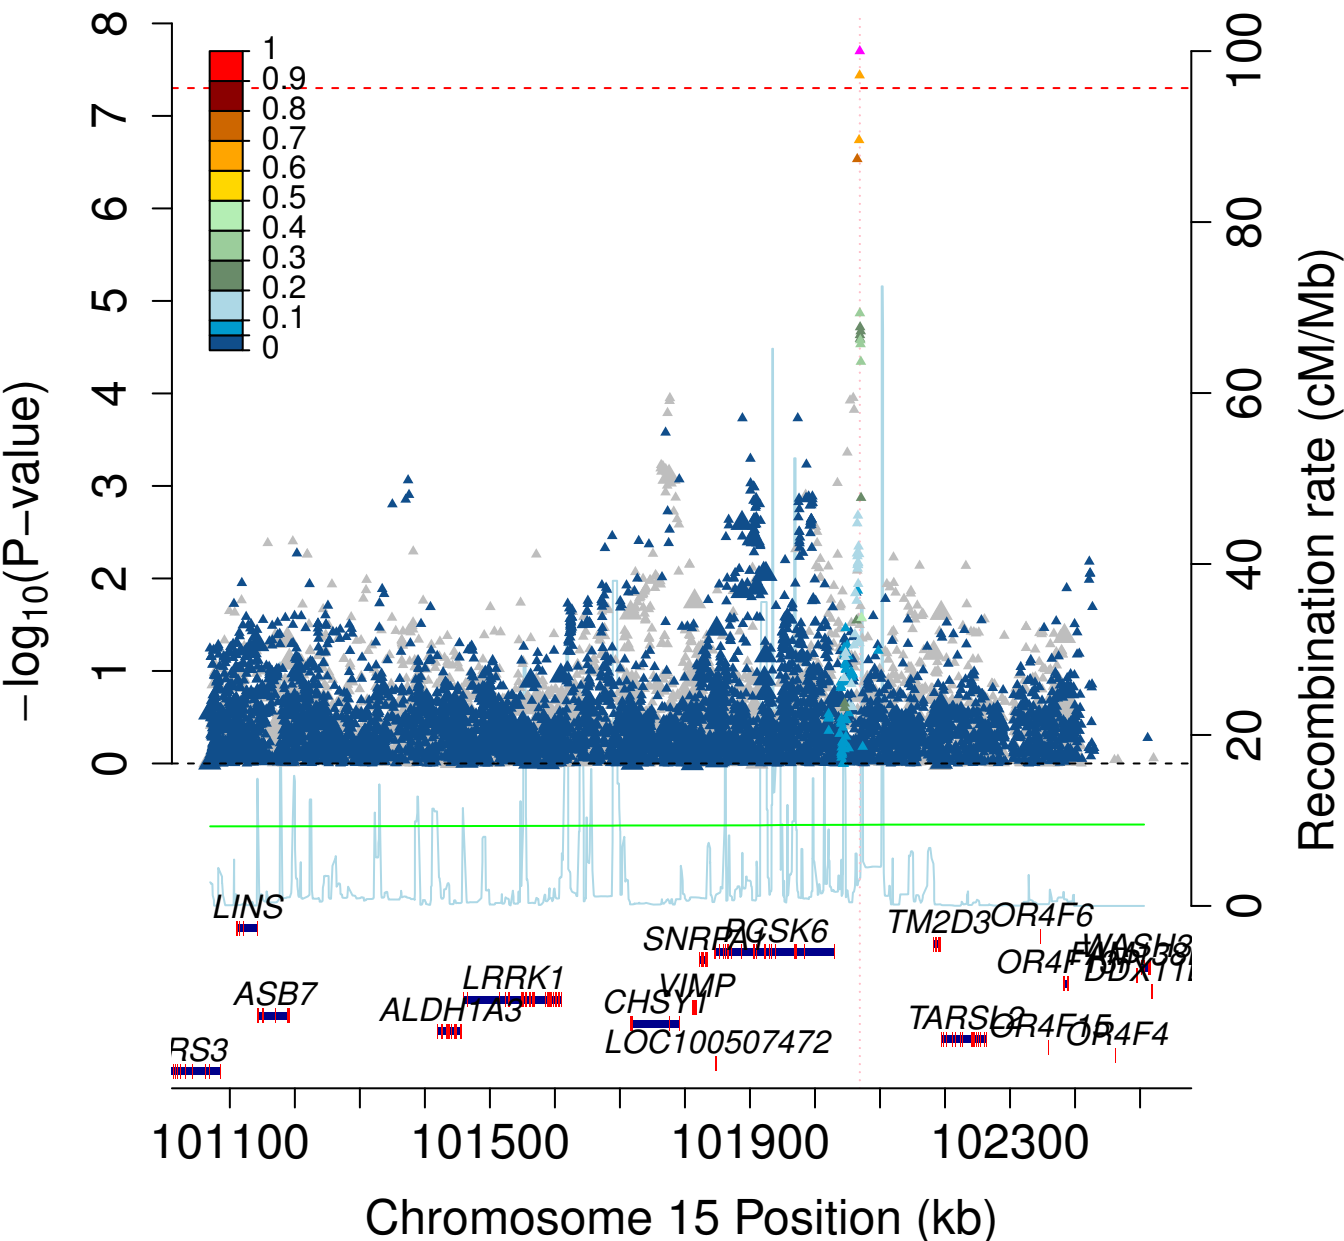

rs67890964 – LDL G

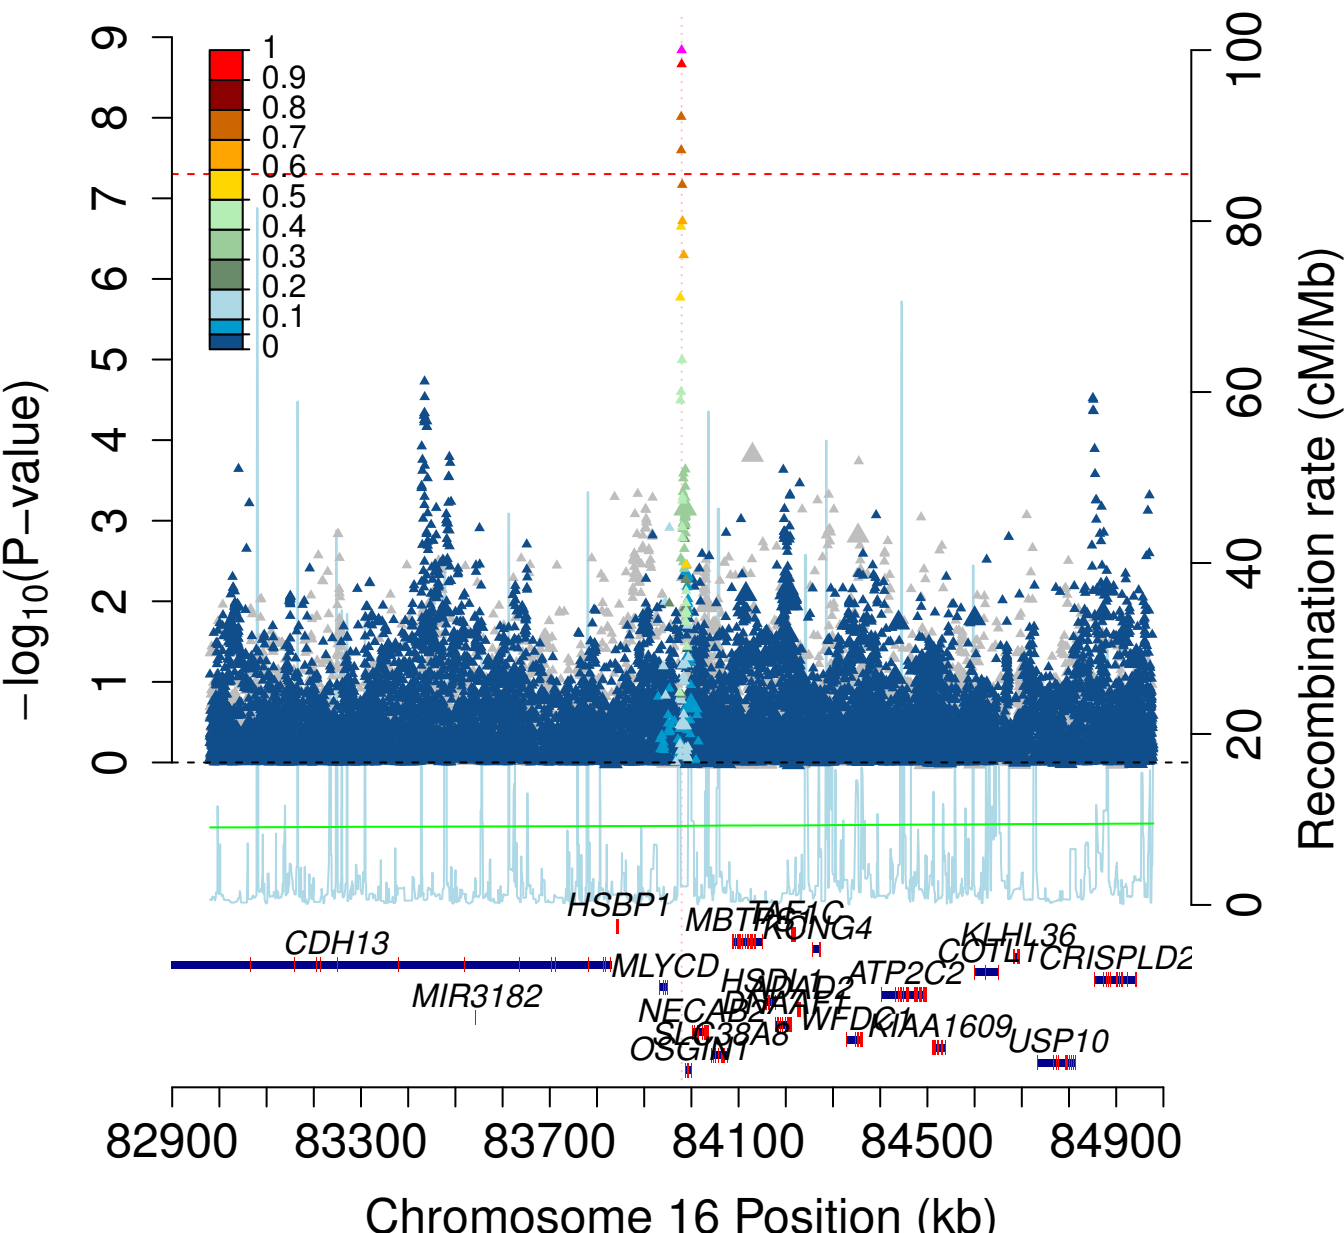



## rs2854322 – TC GG

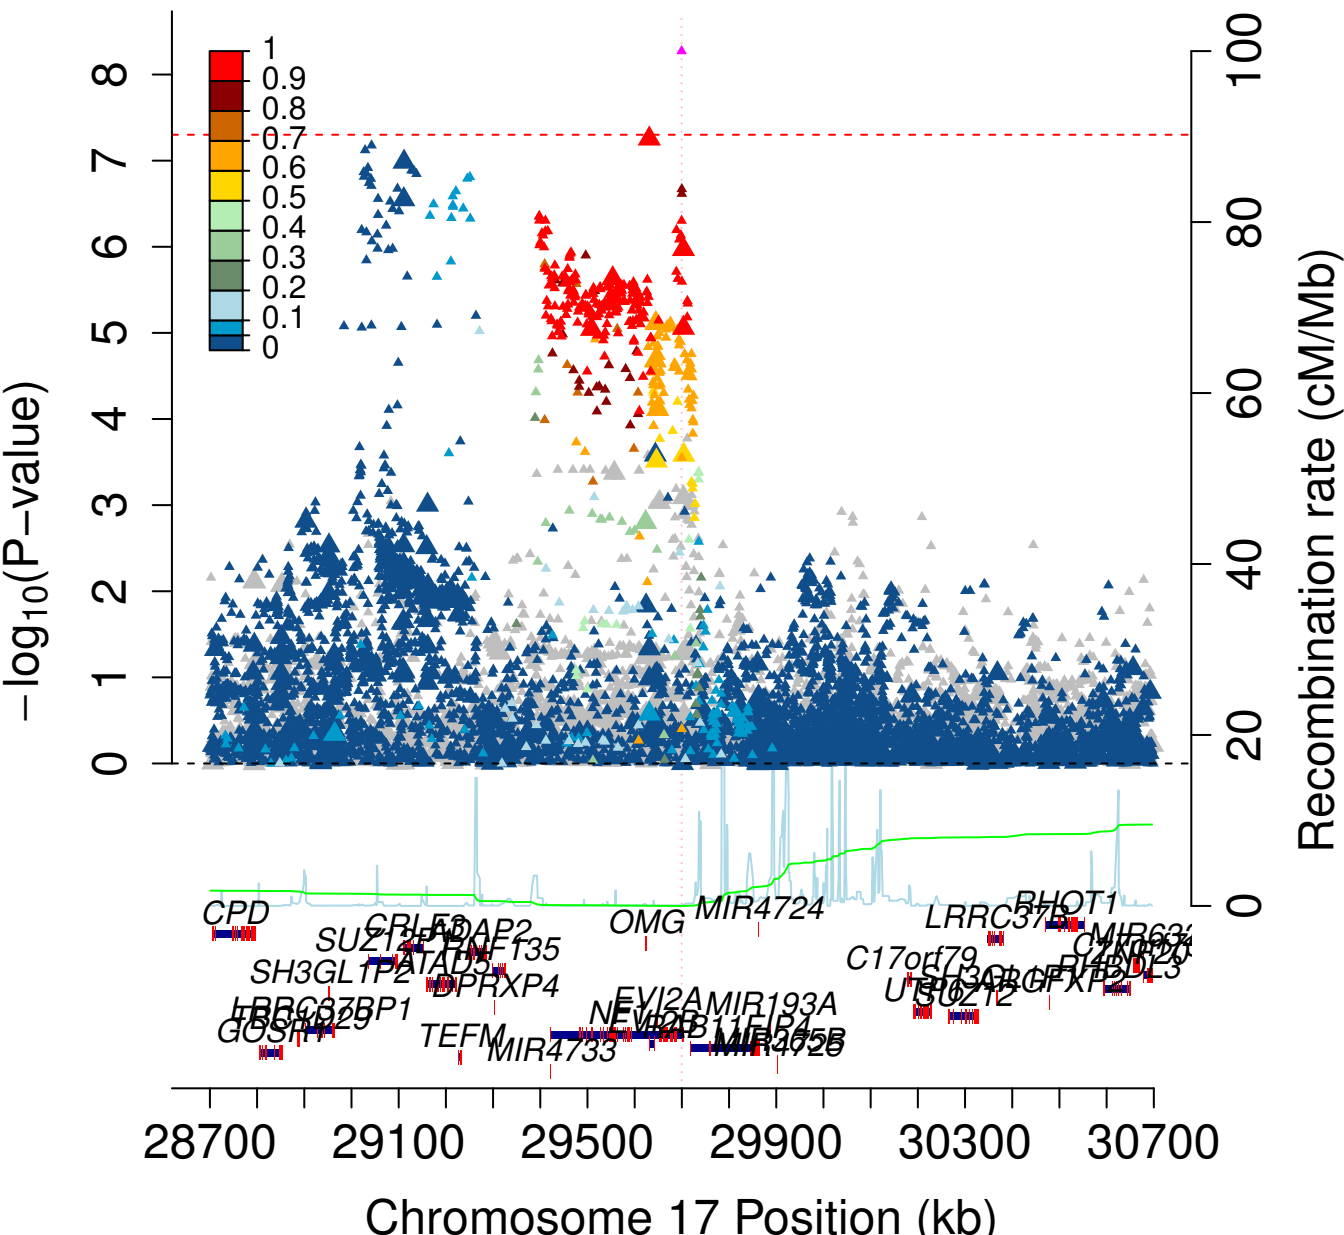



## rs73352129 – LDL GG

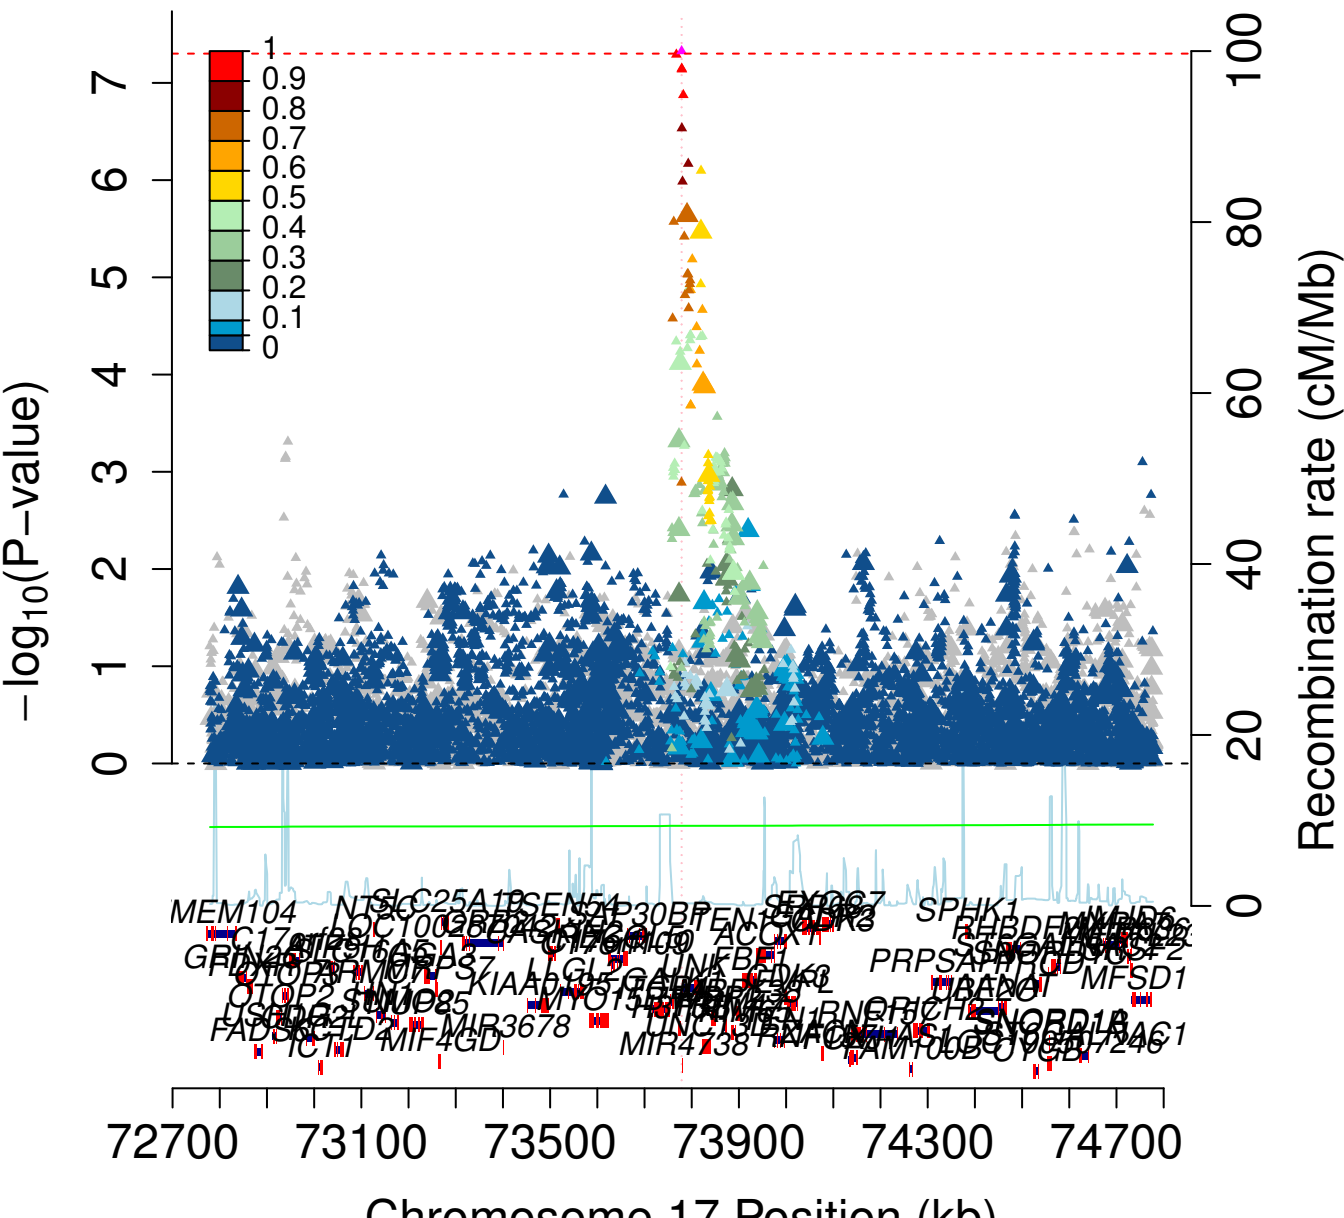

rs328996 – TC GG

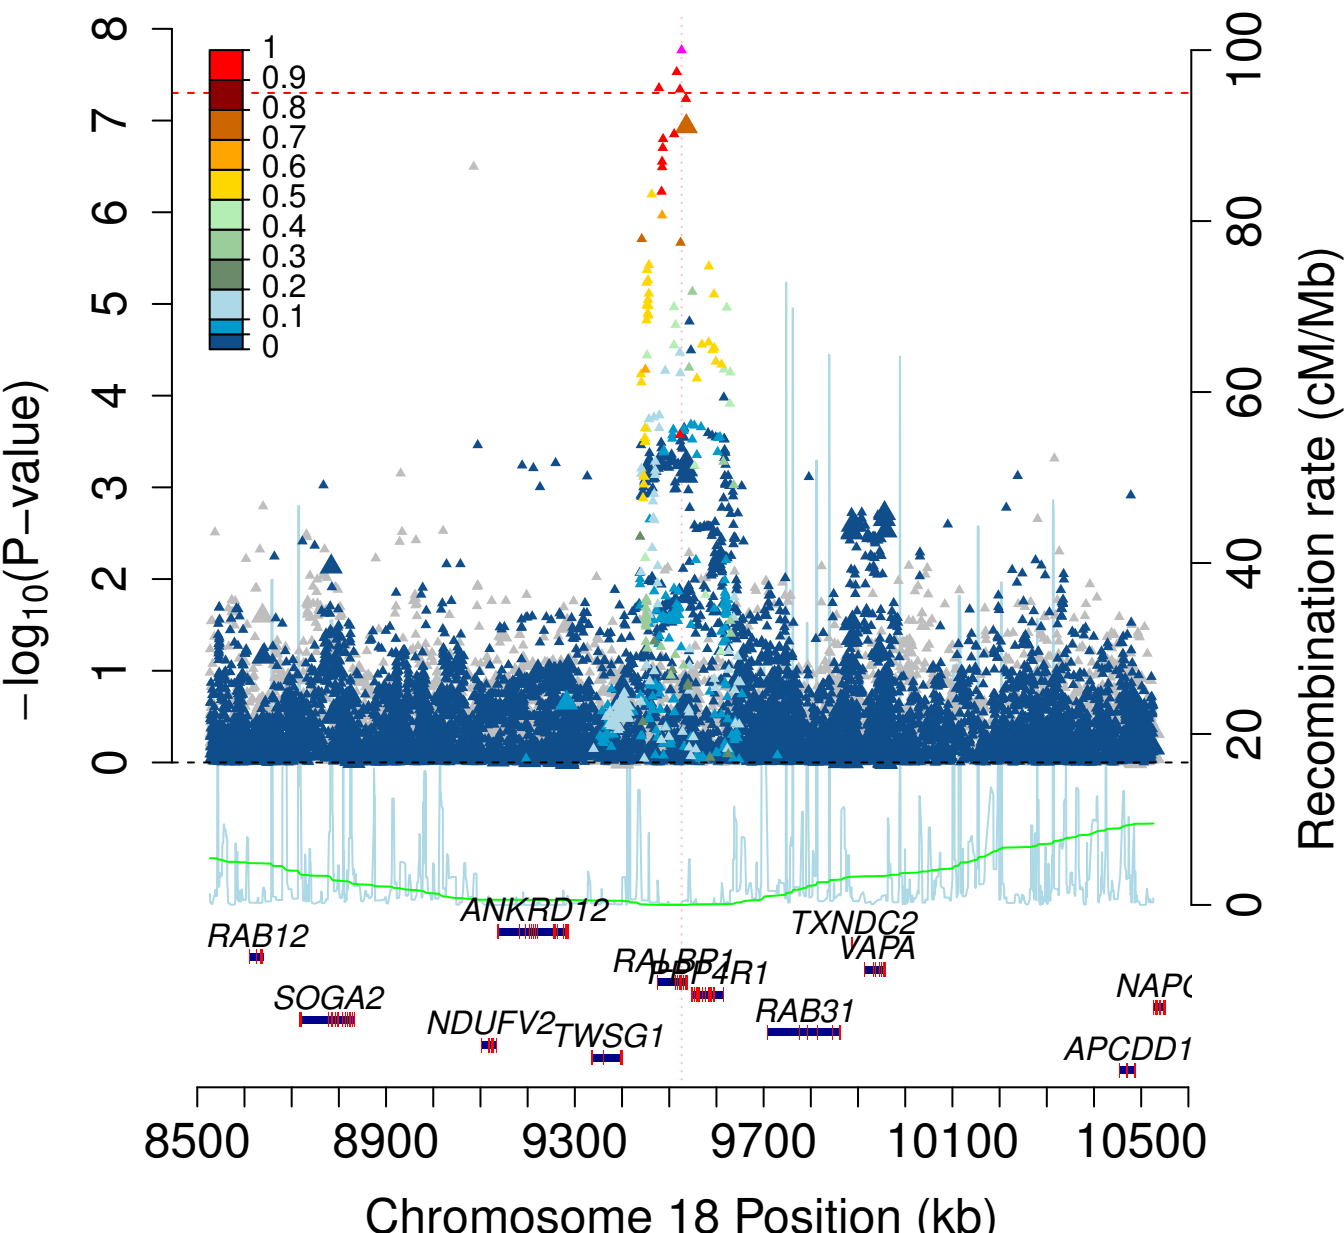

## rs941408 – TC GG

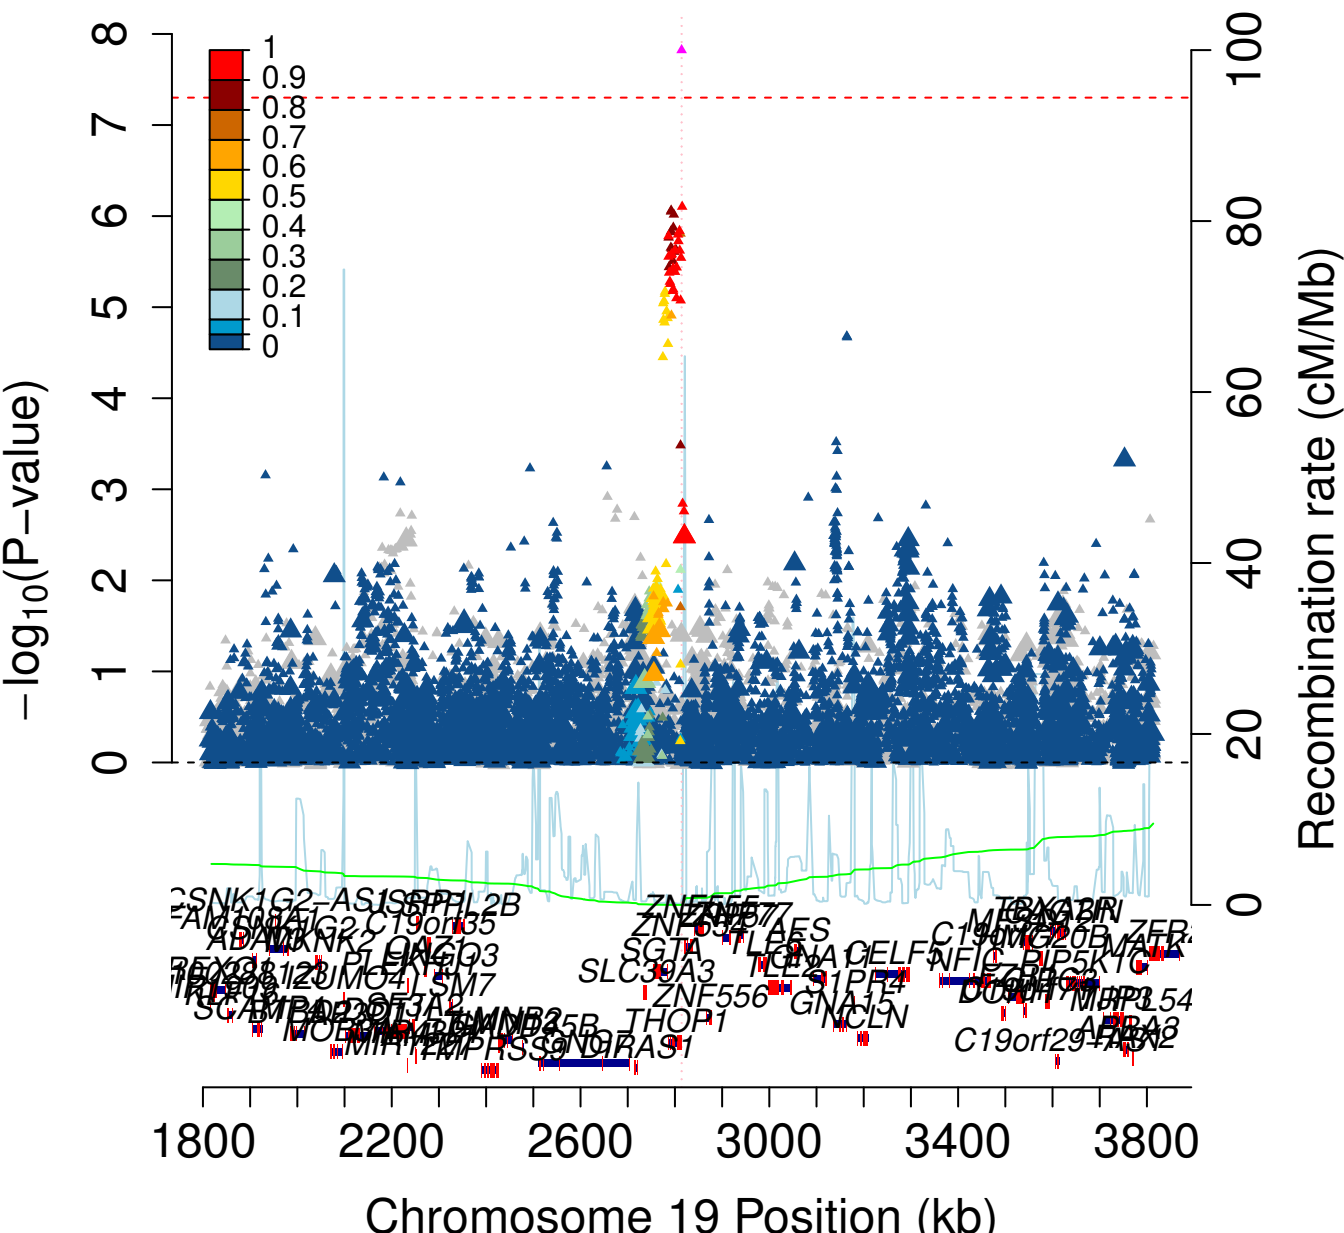



## rs59774409 – TG G

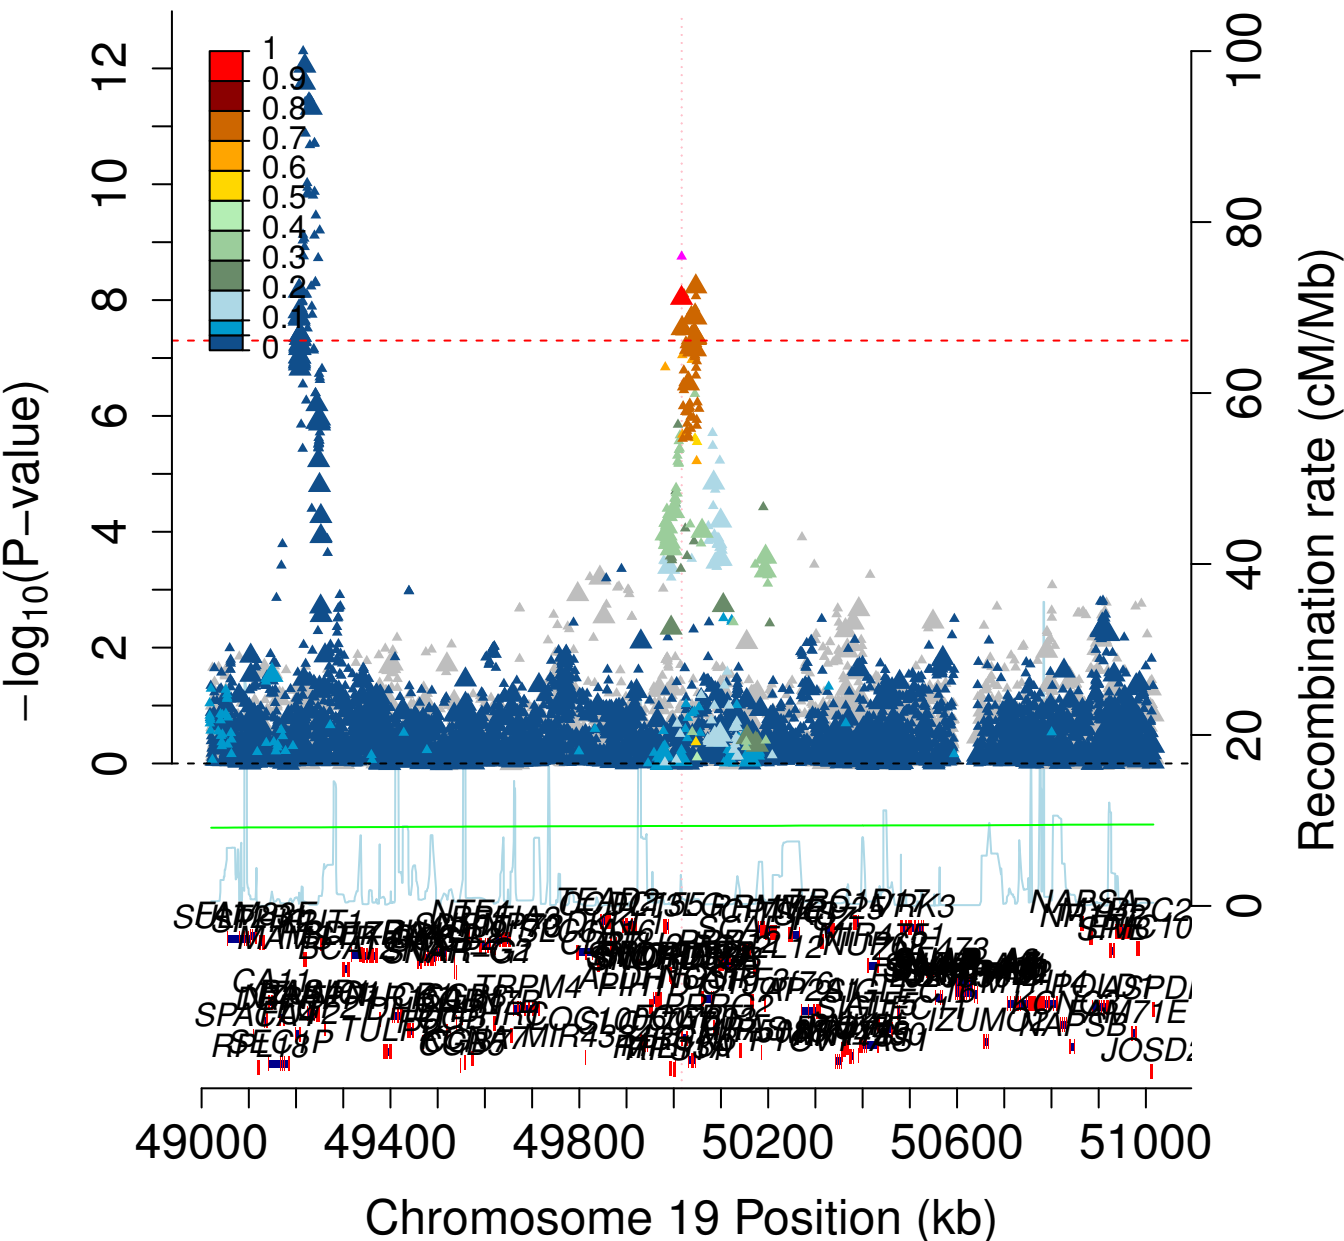

## rs6059988 – HDL GG

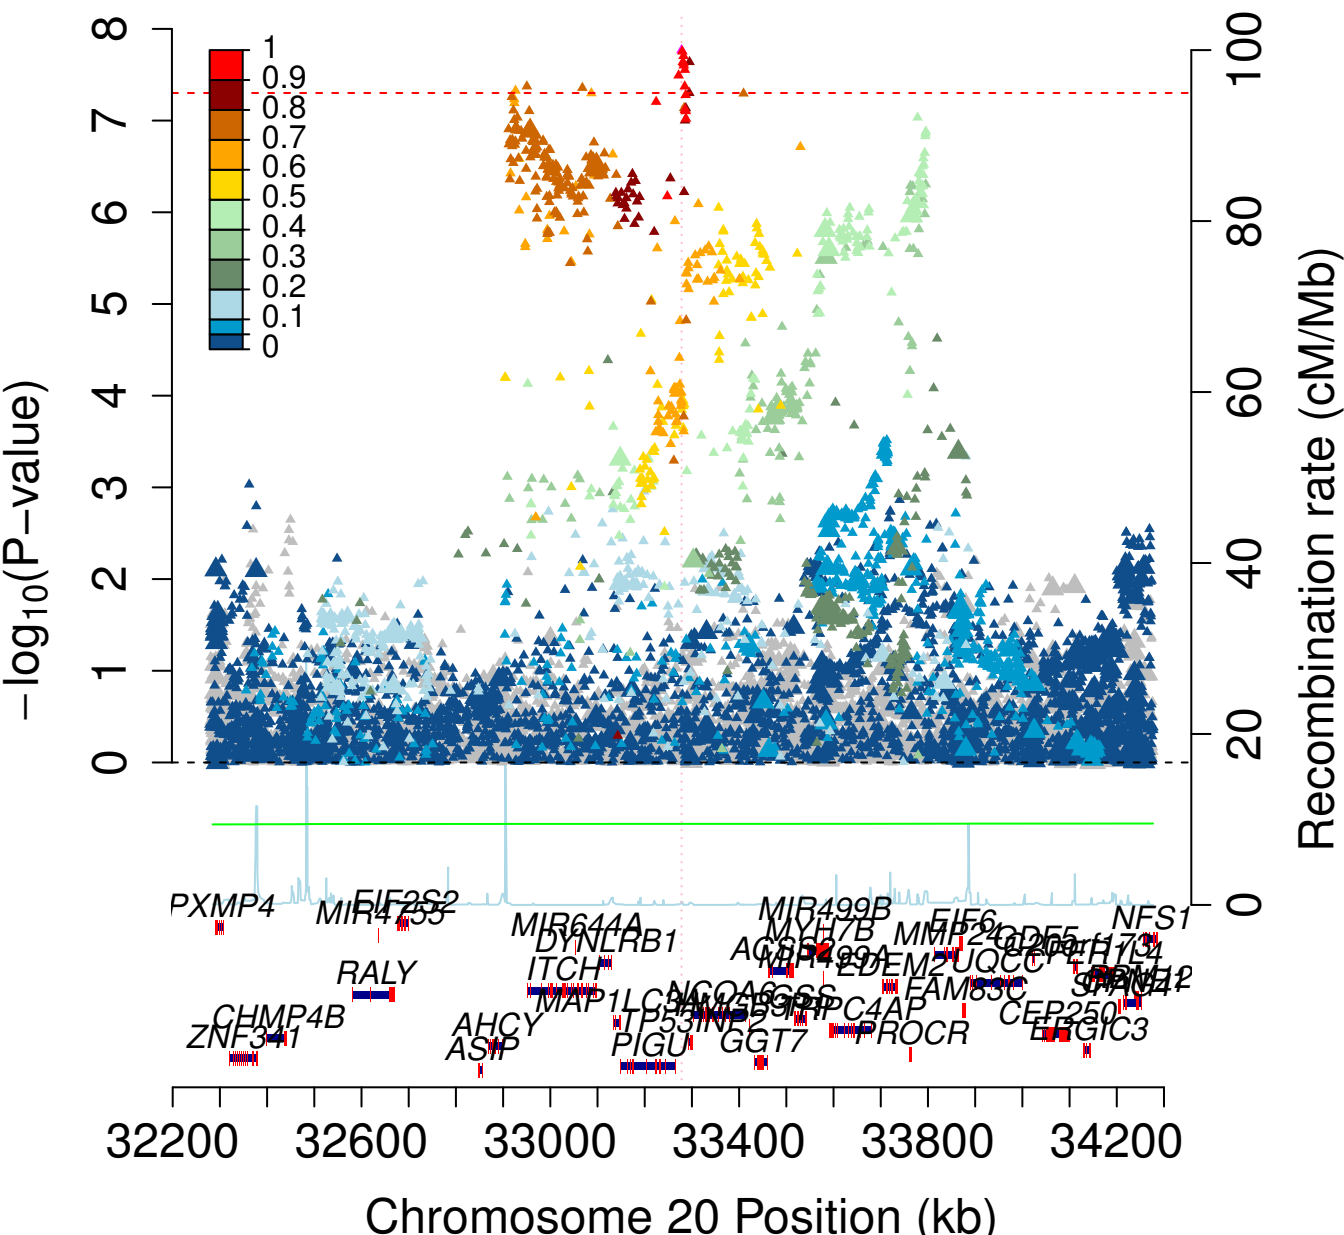

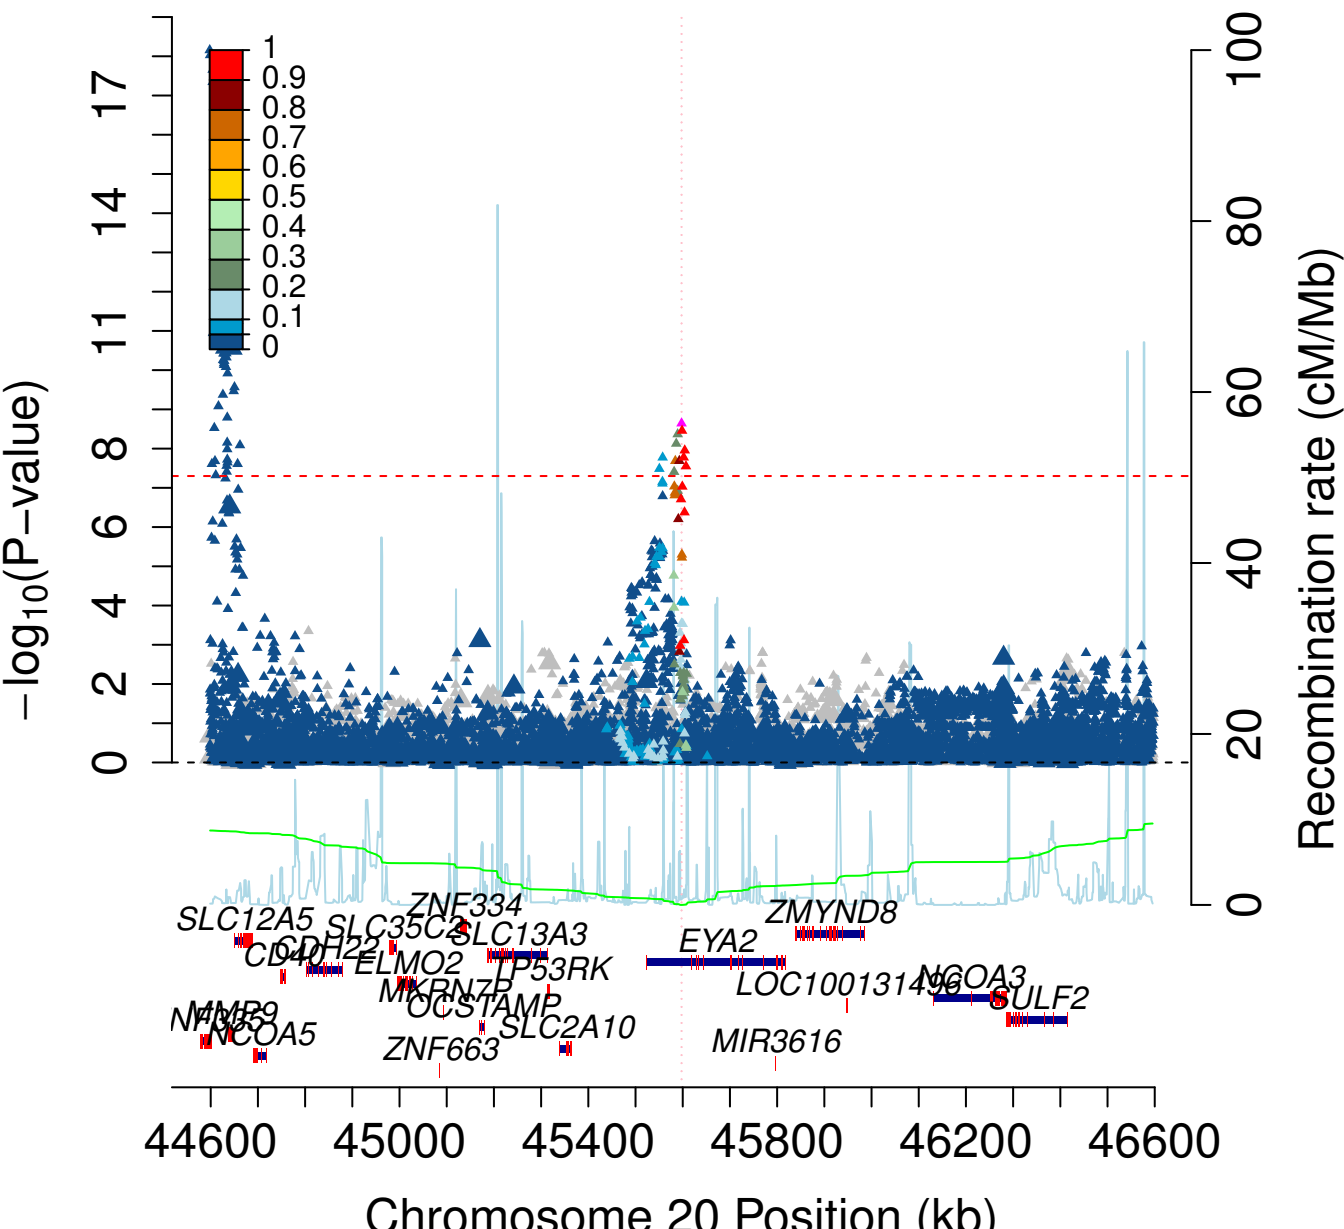

## chr20:46279836:D – HDL GG

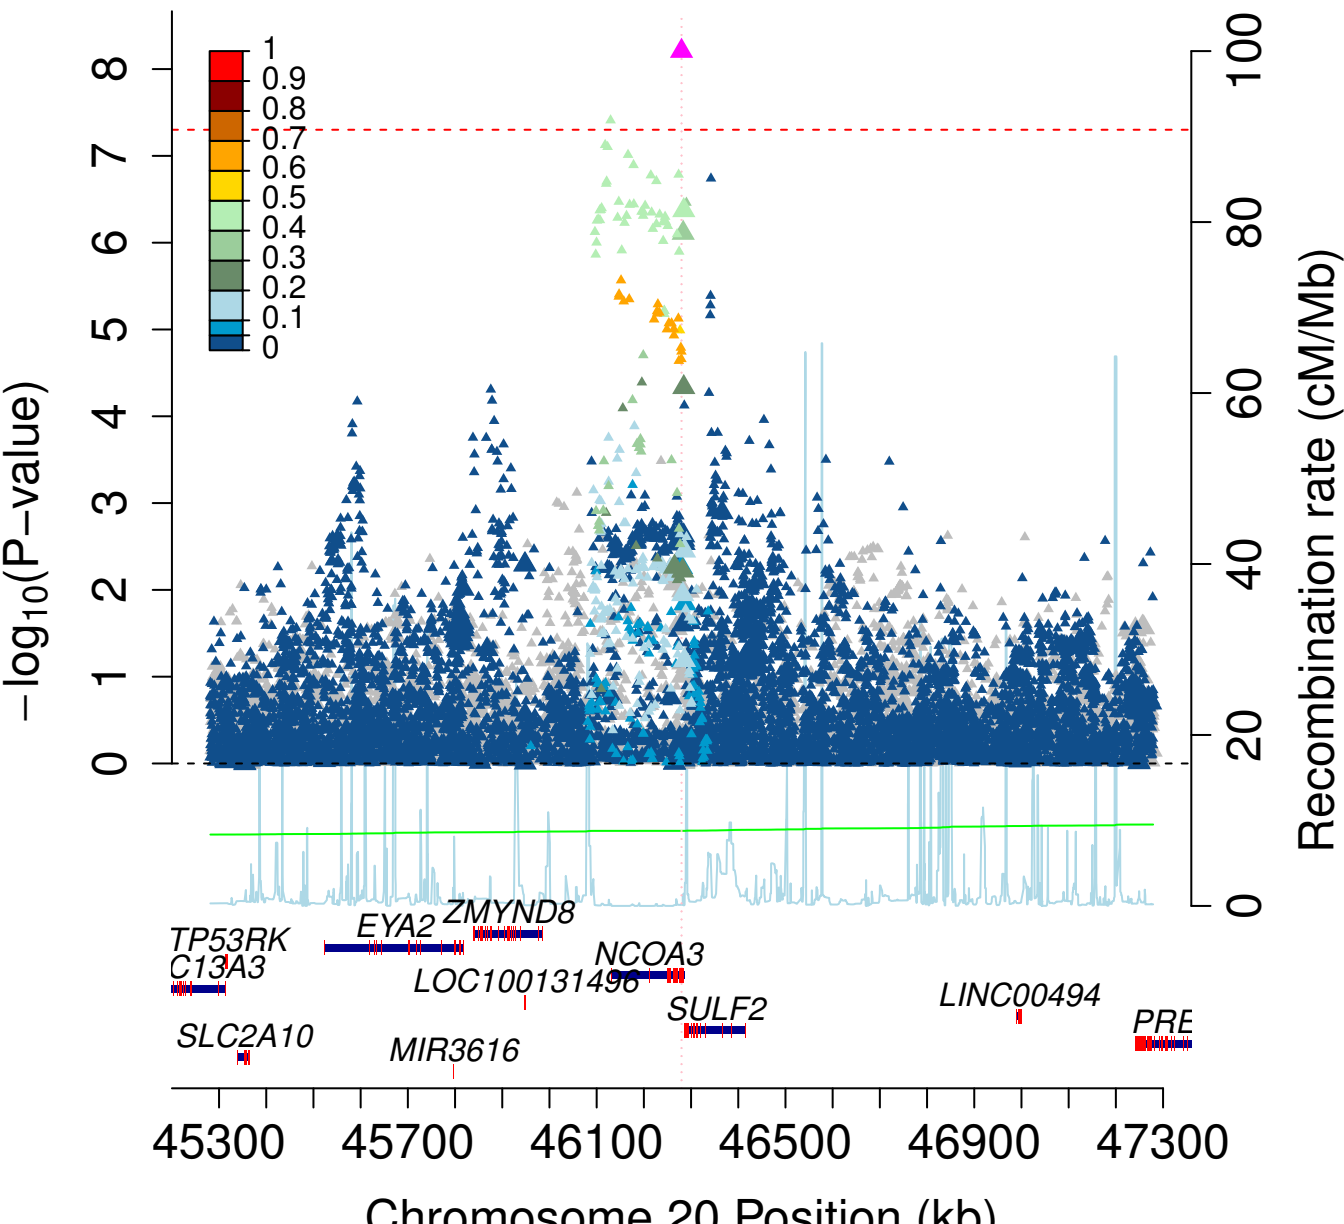











rs138331350 – HDL G

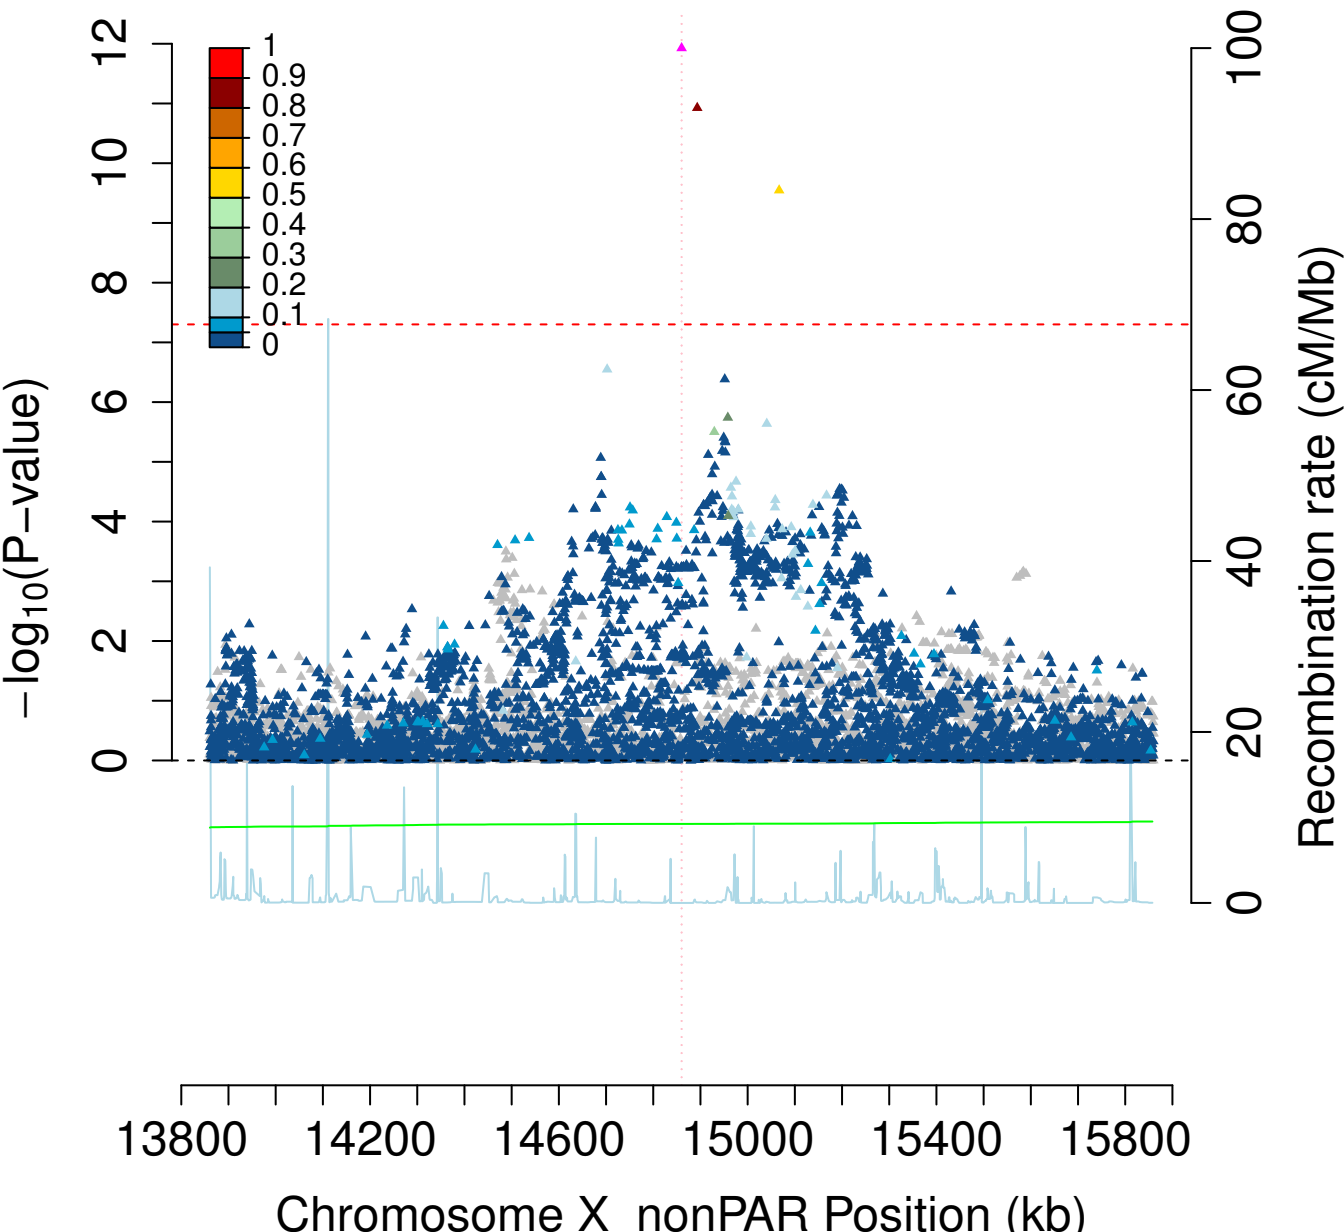

rs3859931 – TG G

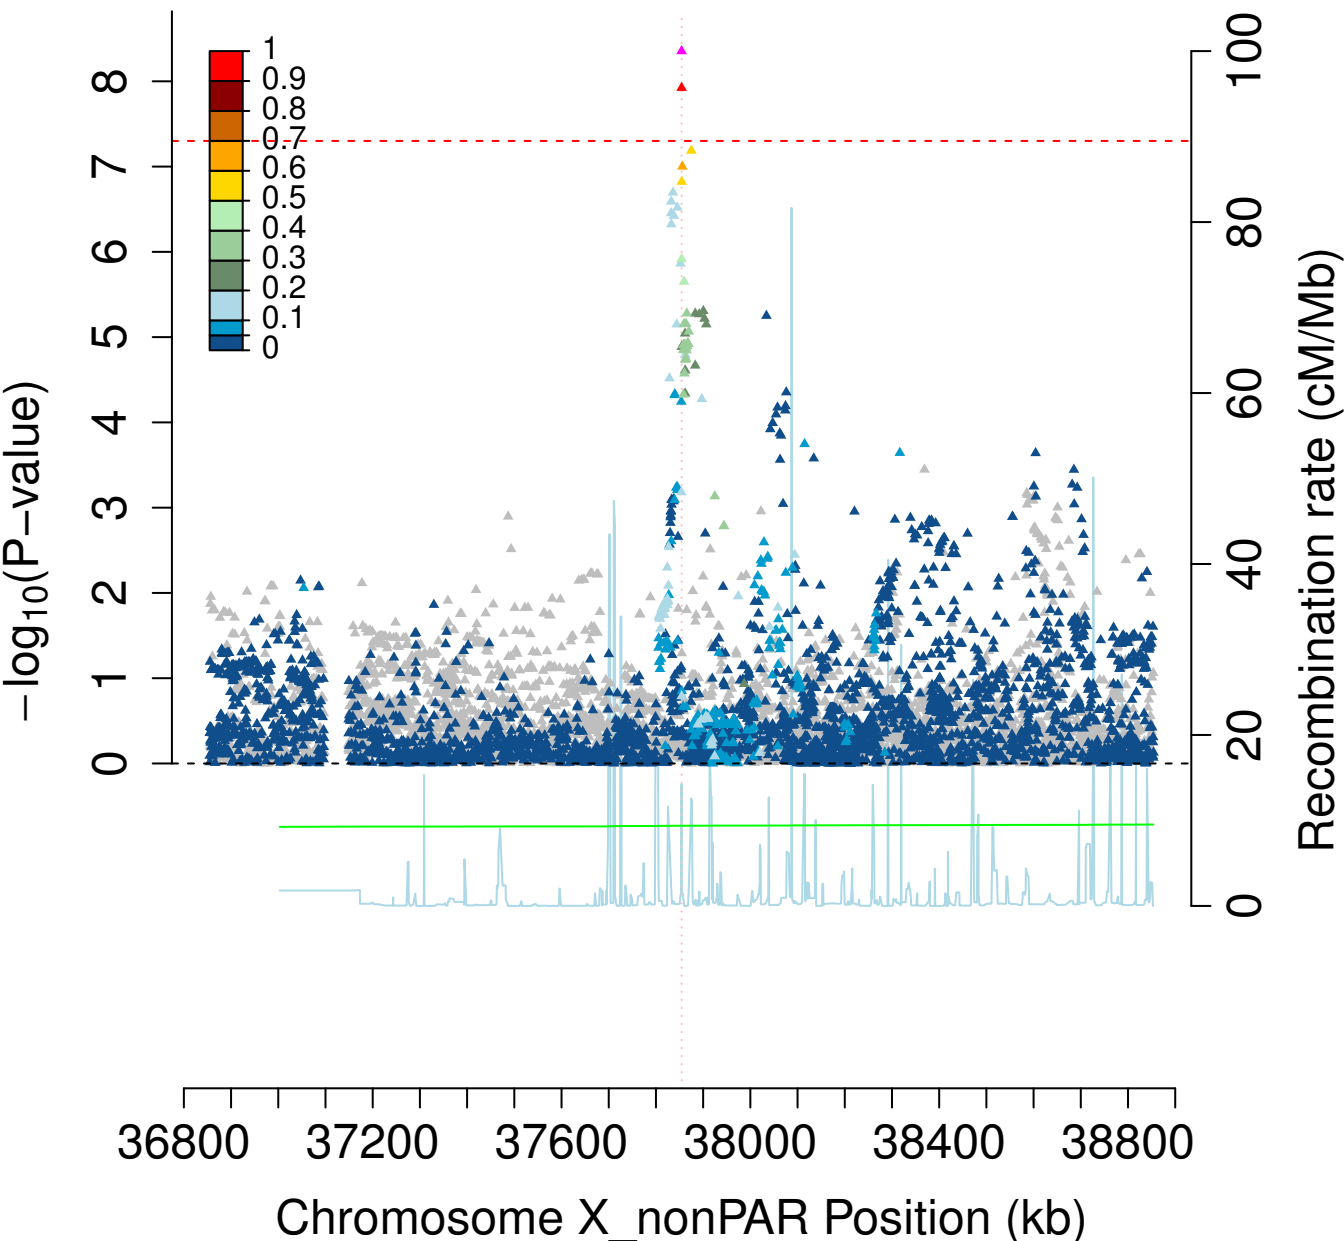

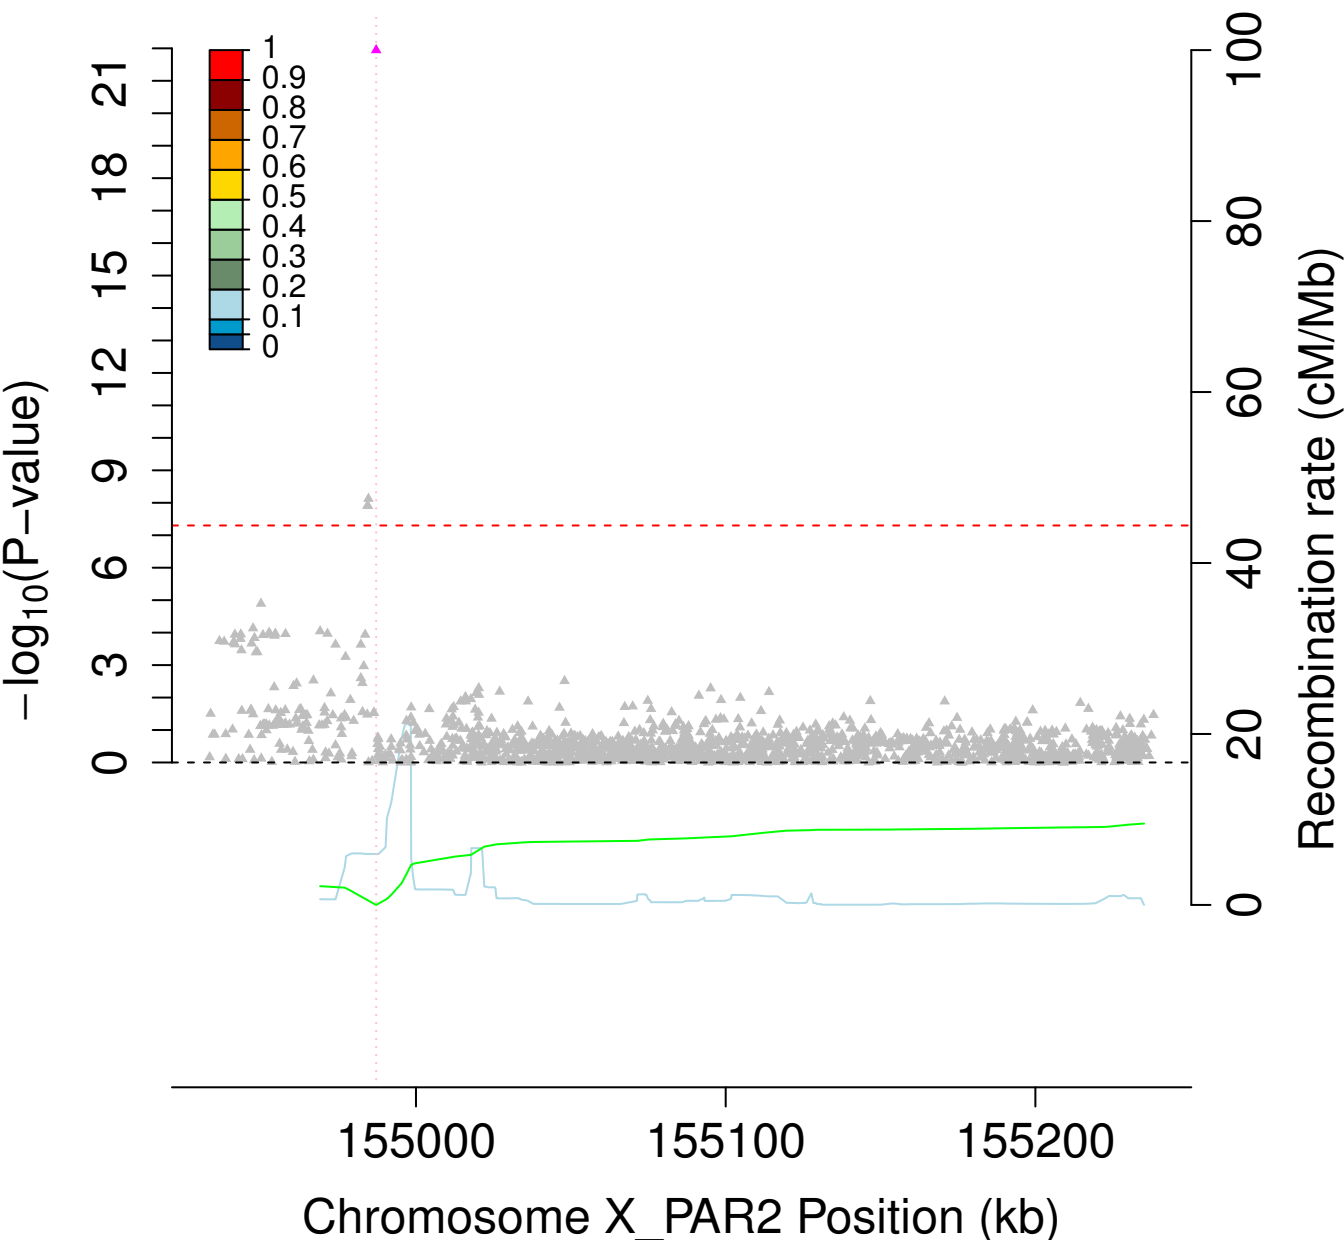

Supplement: NIHMS936300-supplement-3.pdf [file NIHMS936300-supplement-3.pdf]
